# Supplementary material for: Spatial transcriptomics reveals metabolic changes underly age-dependent declines in digit regeneration
Source: eLife. 2022 May 26;11:e71542. doi: 10.7554/eLife.71542 (PMC9135401; doi:10.7554/eLife.71542)
Supplement: Supplementary file 2. [file elife-71542-supp2.csv]

Table S2 DEGs preferentially expressed in the boundary
	p_val	avg_logFC	pct.1	pct.2	p_val_adj
Krt42	3.35E-08	1.33369223	0.829	0.645	0.000526069
Slc7a11	1.02E-13	1.2862438	0.371	0.099	1.61E-09
Krt90	1.33E-10	1.266173492	0.829	0.637	2.09E-06
Gpx2	4.72E-26	1.174348931	0.714	0.216	7.42E-22
Lama3	3.38E-14	1.105241132	0.4	0.111	5.31E-10
Tgfbi	1.08E-13	1.072832247	0.829	0.49	1.70E-09
Lamc2	8.06E-09	1.067328493	0.386	0.153	0.000126787
Sfr1	5.61E-15	1.06611324	0.557	0.203	8.82E-11
Fam162a	1.91E-12	1.031718496	0.786	0.5	3.00E-08
Col7a1	4.35E-14	1.02212923	0.586	0.235	6.84E-10
Lamb3	2.49E-12	0.99701253	0.5	0.192	3.92E-08
Nrep	4.19E-16	0.993823681	0.471	0.137	6.58E-12
Txndc17	5.43E-17	0.986880009	0.829	0.536	8.54E-13
Slc7a8	1.51E-29	0.974084908	0.543	0.099	2.37E-25
Prss23	2.67E-16	0.963143884	0.514	0.158	4.19E-12
Itga6	5.91E-13	0.935601623	0.657	0.292	9.29E-09
Odc1	3.23E-09	0.926316499	0.357	0.125	5.09E-05
Slc38a4	1.38E-17	0.925865435	0.457	0.116	2.17E-13
Duoxa1	6.76E-15	0.915255972	0.486	0.156	1.06E-10
Slc2a1	2.05E-17	0.906760323	0.714	0.301	3.22E-13
Itgb4	2.24E-11	0.902871364	0.643	0.324	3.52E-07
Bambi	8.79E-16	0.875210544	0.586	0.204	1.38E-11
Slc3a2	6.24E-17	0.874297348	0.7	0.273	9.81E-13
Fam167a	1.18E-17	0.857476739	0.557	0.171	1.86E-13
Col12a1	3.24E-10	0.845560574	0.571	0.247	5.09E-06
Gclm	1.40E-13	0.845016443	0.486	0.159	2.20E-09
Hif1a	7.94E-17	0.840947163	0.829	0.492	1.25E-12
Ltbp1	2.13E-19	0.820788535	0.543	0.148	3.35E-15
Msx2	4.76E-11	0.817075977	0.357	0.108	7.48E-07
Has3	2.18E-23	0.801012283	0.414	0.073	3.42E-19
Fst	3.05E-14	0.798392275	0.371	0.092	4.79E-10
Cwh43	5.53E-12	0.796722558	0.429	0.136	8.69E-08
Basp1	4.50E-22	0.796131386	0.343	0.054	7.08E-18
Tmsb10	3.58E-20	0.787708684	0.886	0.35	5.63E-16
2200002D01Rik	1.16E-17	0.78174683	0.5	0.14	1.82E-13
Txn1	1.04E-10	0.776978466	0.929	0.822	1.63E-06
Csrp2	8.83E-17	0.766995612	0.486	0.13	1.39E-12
Car2	2.76E-06	0.762493127	0.386	0.18	0.043436606
Tmsb4x	7.48E-16	0.762422521	1	0.949	1.18E-11
Trp63	6.62E-16	0.761048362	0.7	0.302	1.04E-11
Ppic	1.96E-18	0.751336794	0.6	0.174	3.08E-14
Cav2	1.10E-15	0.748320084	0.5	0.146	1.74E-11
Spink6	6.71E-12	0.747007501	0.714	0.359	1.05E-07
Gjb6	5.30E-11	0.74412262	0.471	0.169	8.33E-07
Dpysl3	7.02E-13	0.737904495	0.457	0.145	1.10E-08
Pmepa1	6.99E-10	0.730541001	0.5	0.208	1.10E-05
Igfbp3	1.64E-11	0.727817017	0.614	0.269	2.58E-07
Gsto1	2.32E-11	0.722657763	0.7	0.393	3.65E-07
Bcam	3.48E-08	0.718575478	0.457	0.202	0.000546916
Dst	8.30E-07	0.711703829	0.657	0.418	0.013055783
Snai2	5.80E-15	0.708863856	0.457	0.135	9.11E-11
En1	4.17E-12	0.703251515	0.414	0.131	6.55E-08
Cxcl14	8.41E-07	0.690520842	0.771	0.529	0.013223415
Pthlh	1.25E-08	0.683082797	0.2	0.047	0.000197251
Dsc2	6.95E-12	0.666763276	0.343	0.093	1.09E-07
Itga3	2.72E-14	0.665361184	0.4	0.107	4.28E-10
1810022K09Rik	1.59E-11	0.653348307	0.671	0.307	2.49E-07
Slc38a2	2.80E-12	0.643871069	0.857	0.523	4.40E-08
Arl4c	9.39E-07	0.635099995	0.357	0.154	0.01476111
Esd	1.16E-10	0.635016568	0.543	0.225	1.82E-06
Sp8	2.11E-10	0.634243939	0.329	0.097	3.31E-06
Bnip3	2.22E-11	0.630336889	0.4	0.13	3.49E-07
Phldb2	9.54E-21	0.626421576	0.3	0.043	1.50E-16
Cux1	1.99E-10	0.626023999	0.529	0.218	3.13E-06
Ajuba	4.68E-13	0.623525063	0.443	0.14	7.36E-09
Col5a2	1.90E-07	0.615378384	0.7	0.378	0.002992647
Hoxc13	4.65E-08	0.615199576	0.414	0.171	0.000730386
Cotl1	3.49E-11	0.609526322	0.4	0.125	5.49E-07
Nqo1	3.41E-14	0.605885149	0.329	0.075	5.36E-10
Adam9	3.36E-16	0.605489595	0.371	0.082	5.29E-12
Pdlim7	2.58E-16	0.604184763	0.543	0.159	4.06E-12
Dusp6	1.09E-11	0.595986473	0.371	0.107	1.71E-07
Klra4	4.19E-16	0.591397152	0.129	0.009	6.59E-12
Snhg18	9.14E-08	0.5884337	0.4	0.164	0.001437494
Nfe2l3	1.10E-07	0.587873097	0.229	0.066	0.001736935
Ptk7	1.83E-15	0.585472395	0.457	0.122	2.89E-11
Selenof	1.95E-13	0.582305571	0.7	0.29	3.07E-09
Fhl2	1.39E-12	0.579694088	0.486	0.162	2.18E-08
Ube2c	1.18E-10	0.574950317	0.386	0.123	1.86E-06
Itgb1	2.89E-12	0.56925011	0.671	0.293	4.54E-08
Gng5	2.71E-09	0.566819041	0.843	0.592	4.26E-05
Igfbp7	3.87E-07	0.56571928	0.871	0.699	0.006081574
Tax1bp3	8.98E-14	0.56137582	0.471	0.142	1.41E-09
Lima1	2.62E-10	0.559893714	0.557	0.245	4.12E-06
Lamb1	1.22E-08	0.557075139	0.371	0.132	0.00019212
Ccdc68	1.81E-14	0.554589911	0.229	0.036	2.85E-10
Eif3e	1.13E-11	0.54882993	0.7	0.315	1.78E-07
Rnd3	1.44E-08	0.546691707	0.371	0.138	0.000226558
Papss2	3.00E-14	0.545204908	0.3	0.061	4.72E-10
Actn1	2.34E-14	0.54397233	0.443	0.123	3.67E-10
Cbx3	1.06E-10	0.542931204	0.543	0.209	1.66E-06
Polr1d	3.79E-11	0.539086884	0.643	0.287	5.96E-07
Gmfb	6.25E-11	0.53680084	0.371	0.115	9.83E-07
Lsm6	4.98E-10	0.536094113	0.343	0.105	7.83E-06
Anxa3	5.42E-10	0.531069102	0.286	0.076	8.53E-06
Tbca	4.63E-10	0.530141906	0.614	0.28	7.27E-06
Ucp2	1.51E-09	0.530059194	0.529	0.224	2.37E-05
Capn2	1.42E-10	0.529661606	0.471	0.173	2.22E-06
2610528A11Rik	3.80E-08	0.527976652	0.214	0.055	0.000597953
Fras1	2.07E-12	0.526846222	0.271	0.058	3.25E-08
Tes	1.04E-10	0.523550491	0.257	0.061	1.64E-06
Mcee	1.16E-06	0.523037957	0.214	0.063	0.01817324
Plk2	3.53E-13	0.522335764	0.414	0.115	5.55E-09
Eif2s2	4.49E-09	0.519385638	0.543	0.253	7.06E-05
Ywhah	4.13E-09	0.519269298	0.543	0.24	6.49E-05
Dtymk	4.23E-09	0.516754084	0.314	0.096	6.65E-05
Cnn3	1.19E-08	0.5159148	0.457	0.189	0.000186992
Col18a1	1.20E-10	0.514710897	0.771	0.376	1.88E-06
Matn2	5.04E-07	0.512071394	0.4	0.164	0.007924702
Snrpe	4.52E-09	0.512004032	0.6	0.297	7.10E-05
Ywhaq	8.53E-09	0.510165024	0.671	0.361	0.000134062
Gsta4	9.56E-08	0.509992351	0.571	0.308	0.001502954
Cald1	1.18E-07	0.504277471	0.4	0.166	0.00186141
Sub1	4.20E-10	0.503475028	0.643	0.302	6.61E-06
Tnc	5.25E-07	0.502665036	0.429	0.18	0.008253486
Zmpste24	8.33E-10	0.499291845	0.4	0.14	1.31E-05
Agrn	1.89E-09	0.499153982	0.486	0.194	2.98E-05
Glo1	5.97E-08	0.499122673	0.8	0.49	0.000939009
S100a6	3.84E-08	0.496569114	0.971	0.906	0.000604574
Inafm2	5.67E-07	0.4932985	0.357	0.142	0.00891716
Vcl	9.59E-10	0.49273842	0.471	0.18	1.51E-05
Stom	1.39E-11	0.492583033	0.314	0.08	2.18E-07
Vdac3	1.96E-09	0.492243198	0.386	0.13	3.08E-05
Cav1	5.45E-12	0.491748338	0.657	0.266	8.57E-08
Abracl	9.80E-08	0.49154103	0.457	0.197	0.001540376
Ahcyl2	2.66E-08	0.488206583	0.343	0.121	0.000418105
Ak1	1.03E-12	0.48530655	0.443	0.135	1.62E-08
Svbp	3.77E-10	0.484333918	0.357	0.11	5.93E-06
Plp2	3.51E-09	0.482860644	0.557	0.25	5.52E-05
Psma2	5.20E-12	0.48195618	0.614	0.245	8.18E-08
Nuak1	2.43E-09	0.480313398	0.229	0.054	3.82E-05
Tcf7	1.10E-09	0.479066337	0.214	0.047	1.74E-05
Kif13a	6.23E-08	0.478422643	0.343	0.123	0.000979273
Anapc10	1.75E-10	0.478019435	0.243	0.056	2.76E-06
Atxn1	2.01E-10	0.476847071	0.343	0.101	3.16E-06
Fads3	4.62E-09	0.476602096	0.3	0.088	7.26E-05
Wls	1.00E-09	0.475392289	0.514	0.203	1.58E-05
Tpm1	4.32E-10	0.474346619	0.714	0.34	6.79E-06
Cdv3	3.28E-07	0.474276606	0.386	0.156	0.005163561
Rpl13a	8.18E-11	0.474013444	0.829	0.434	1.29E-06
Wnt10a	1.76E-09	0.472909607	0.343	0.108	2.77E-05
Hsbp1	3.88E-12	0.472234235	0.629	0.249	6.10E-08
Adarb1	2.80E-12	0.471437975	0.314	0.076	4.41E-08
Golim4	3.27E-07	0.471428526	0.371	0.147	0.005146179
Ppp1r14c	3.66E-08	0.470272097	0.357	0.13	0.000574862
Gja1	3.68E-07	0.469469474	0.886	0.787	0.005778594
Tmem167	1.54E-10	0.468634857	0.543	0.209	2.43E-06
Col4a5	6.72E-10	0.468357776	0.229	0.051	1.06E-05
Lad1	6.93E-09	0.468062361	0.586	0.268	0.000108936
1500015O10Rik	1.17E-06	0.467550233	0.414	0.177	0.018438687
Upk3bl	3.69E-12	0.465867582	0.129	0.013	5.81E-08
Aknad1	5.22E-10	0.46559664	0.229	0.051	8.21E-06
Tpm4	4.51E-10	0.465044879	0.657	0.304	7.09E-06
Mrpl20	1.01E-09	0.463513659	0.529	0.214	1.59E-05
Gpc3	1.41E-06	0.462397108	0.243	0.08	0.022105968
Dkk3	6.07E-08	0.460881325	0.4	0.156	0.000954227
Vti1b	5.16E-10	0.459683336	0.371	0.121	8.11E-06
Sdcbp	5.64E-11	0.458927685	0.571	0.223	8.87E-07
Skp1a	2.32E-07	0.458922338	0.514	0.25	0.0036449
Hsp90aa1	8.89E-09	0.457780359	0.557	0.25	0.00013978
Cdk2ap1	1.88E-10	0.457595597	0.529	0.204	2.96E-06
Itpr3	2.24E-08	0.45649516	0.557	0.268	0.000352787
Casp1	5.45E-10	0.455714162	0.3	0.082	8.56E-06
Sumo1	2.06E-09	0.454706202	0.471	0.181	3.25E-05
Msn	2.65E-11	0.453446752	0.6	0.252	4.17E-07
Nedd9	7.93E-10	0.451455769	0.314	0.09	1.25E-05
Ier3	4.51E-09	0.451296583	0.543	0.233	7.09E-05
Dync1li2	6.86E-11	0.449913153	0.443	0.149	1.08E-06
Cnih1	1.89E-09	0.448316639	0.429	0.154	2.97E-05
2010107E04Rik	4.93E-08	0.447350182	0.8	0.447	0.000775304
Dusp7	6.38E-07	0.445387442	0.357	0.144	0.01002993
Bax	2.80E-07	0.444646754	0.343	0.132	0.004409946
Atp6ap2	1.95E-08	0.443116444	0.5	0.218	0.000306619
Oaf	1.97E-08	0.441721143	0.257	0.071	0.000310096
Glrx3	3.16E-06	0.441304657	0.471	0.24	0.049649076
Cyr61	1.97E-08	0.440672586	0.343	0.115	0.000310286
Tma7	1.05E-08	0.439971024	0.7	0.348	0.000165854
Rnf7	5.30E-09	0.43926753	0.486	0.202	8.34E-05
Cacybp	1.26E-08	0.438428765	0.4	0.146	0.000197891
Pxdc1	2.15E-09	0.438178526	0.314	0.092	3.39E-05
Sec61b	4.46E-09	0.437967445	0.6	0.28	7.02E-05
Lxn	1.16E-09	0.437417966	0.271	0.071	1.82E-05
Akr1b8	1.61E-07	0.436684653	0.229	0.066	0.002526537
Gnb1	9.26E-09	0.435907128	0.814	0.423	0.000145667
C1d	5.05E-09	0.434330779	0.4	0.139	7.94E-05
Pigp	1.96E-06	0.43303666	0.286	0.106	0.030782011
Tbx18	1.06E-08	0.431975558	0.214	0.051	0.000166353
Bnc1	1.06E-09	0.431301043	0.229	0.053	1.66E-05
Rexo2	3.26E-09	0.431064431	0.486	0.194	5.13E-05
Cyfip1	1.47E-06	0.42929121	0.357	0.148	0.023039419
Cib2	2.32E-06	0.429108788	0.4	0.179	0.0364475
Tubb6	2.08E-06	0.429081021	0.271	0.099	0.032726271
Ebna1bp2	9.22E-07	0.428336875	0.343	0.135	0.01449208
Ier3ip1	7.34E-08	0.426040344	0.414	0.168	0.001153924
Cox7a2l	7.41E-11	0.425114725	0.7	0.315	1.16E-06
Txndc15	4.30E-08	0.424935133	0.271	0.082	0.000675705
Tomm5	2.44E-06	0.424573677	0.4	0.183	0.038422142
Snn	4.02E-07	0.424256343	0.357	0.143	0.006318545
Txnl4a	3.69E-07	0.42390128	0.314	0.114	0.005806713
Ndufa1	2.59E-09	0.423244826	0.657	0.308	4.07E-05
Uqcrb	1.59E-07	0.422946726	0.714	0.396	0.0025078
Set	8.14E-09	0.418879824	0.629	0.304	0.000128041
Snrpd1	2.75E-07	0.413506258	0.5	0.235	0.004321077
Slc39a6	1.71E-06	0.413211601	0.443	0.209	0.026830221
Ywhag	1.03E-06	0.413079572	0.471	0.229	0.016196529
Cd59a	2.53E-08	0.412503957	0.286	0.087	0.000398306
Hspe1	7.58E-08	0.411488756	0.686	0.364	0.001192135
Homer3	2.20E-09	0.410218598	0.229	0.054	3.46E-05
Pdcd6	1.77E-07	0.409932875	0.471	0.216	0.002791002
Pi4k2b	1.00E-06	0.405136735	0.171	0.044	0.015721618
Tmem238	6.21E-07	0.404698124	0.329	0.126	0.009770999
Tpst1	1.04E-08	0.404060689	0.271	0.076	0.000164217
Ost4	1.49E-07	0.403572007	0.657	0.348	0.002338228
Morf4l2	6.14E-09	0.403357402	0.657	0.316	9.65E-05
Casq2	1.03E-11	0.402144021	0.171	0.025	1.62E-07
Cct2	1.31E-09	0.402100112	0.629	0.28	2.06E-05
Rin1	2.21E-08	0.402009818	0.243	0.066	0.000347612
Ankrd10	1.06E-07	0.400913763	0.229	0.063	0.001661842
Slc7a5	1.13E-08	0.399675381	0.329	0.105	0.000178394
Rab31	1.24E-08	0.3982645	0.343	0.113	0.000195334
Scx	1.38E-06	0.398140424	0.2	0.058	0.021747931
Slc16a1	2.62E-07	0.397965825	0.357	0.137	0.004112036
Cbr2	3.36E-07	0.396798113	0.329	0.12	0.005282967
Cops9	6.09E-07	0.394106692	0.671	0.368	0.009579911
Pttg1	3.10E-06	0.393724733	0.243	0.083	0.048796856
Ccnd2	6.03E-07	0.391470512	0.357	0.137	0.009481768
Pdlim1	1.10E-08	0.390899872	0.514	0.217	0.000172447
Mrpl34	9.40E-07	0.390088878	0.314	0.118	0.014775946
Med21	3.04E-07	0.390030363	0.357	0.141	0.004777802
Pin4	2.84E-06	0.389428528	0.3	0.116	0.044601573
Ftl1	5.13E-09	0.388519058	0.986	0.754	8.07E-05
Clta	3.45E-09	0.388459316	0.629	0.291	5.42E-05
Marcksl1	7.52E-07	0.387172114	0.3	0.107	0.011828183
Ube2v2	5.33E-07	0.386581326	0.357	0.147	0.008385312
Rtraf	2.03E-08	0.386509576	0.571	0.263	0.000318623
Sp9	2.99E-10	0.385818613	0.2	0.039	4.70E-06
Smad2	5.10E-08	0.384587367	0.243	0.068	0.000801146
Serinc2	8.90E-07	0.383238045	0.271	0.093	0.013988478
Sertad4	2.41E-07	0.383106483	0.357	0.136	0.00378965
Tnfrsf12a	9.09E-07	0.382110256	0.357	0.146	0.014291934
Gm10076	6.80E-08	0.381122656	0.257	0.075	0.001069334
Vdac2	6.30E-09	0.380352423	0.543	0.239	9.91E-05
Ufm1	5.49E-08	0.37978637	0.414	0.163	0.00086284
Sorcs2	2.57E-07	0.379775489	0.229	0.066	0.004048365
Dnajb6	1.21E-06	0.378838122	0.443	0.213	0.019038577
Selenow	1.36E-07	0.3779696	0.729	0.41	0.002137885
Egln3	1.54E-06	0.377939307	0.371	0.156	0.024261719
Rab13	2.85E-15	0.377378481	0.171	0.018	4.48E-11
Ctnnb1	1.10E-08	0.377330596	0.9	0.64	0.000172789
Nsg1	2.68E-07	0.376923215	0.214	0.058	0.004215186
Egln1	4.86E-07	0.376902683	0.371	0.15	0.007634131
Tpm2	5.83E-08	0.374996114	0.586	0.271	0.00091643
Timm8b	2.45E-07	0.370448962	0.429	0.178	0.003856741
Srp19	1.63E-06	0.369817209	0.371	0.152	0.025667445
Tm9sf3	6.30E-08	0.368516948	0.543	0.254	0.000990517
Mrps21	2.33E-07	0.368086225	0.514	0.247	0.003661484
Cap1	3.37E-08	0.367545063	0.543	0.249	0.000530308
Trim8	8.91E-07	0.365253511	0.257	0.084	0.014010935
Cdh3	2.30E-06	0.365136031	0.257	0.089	0.036227024
Mcub	1.42E-08	0.363105681	0.171	0.035	0.000222683
Sema5a	3.02E-07	0.36084815	0.257	0.08	0.004744247
D16Ertd472e	2.24E-06	0.360615209	0.257	0.088	0.03528019
Sem1	9.19E-09	0.358770125	0.914	0.696	0.000144474
Dennd5a	1.42E-07	0.358351279	0.257	0.075	0.002240364
Zbtb8os	2.17E-06	0.3579126	0.243	0.082	0.034108249
Morf4l1	2.16E-08	0.357628884	0.714	0.383	0.000340249
Slc39a1	2.80E-06	0.357602468	0.443	0.212	0.04399689
Rbx1	5.32E-07	0.354965803	0.686	0.379	0.008357966
Ssu72	1.01E-06	0.354443475	0.443	0.202	0.015951206
Pcbp2	2.34E-07	0.352265175	0.729	0.4	0.003675366
Mrpl23	2.21E-07	0.351133895	0.4	0.161	0.003480529
Mrps35	2.81E-06	0.349068235	0.243	0.082	0.044166775
Hprt	6.73E-07	0.348981856	0.457	0.202	0.010576978
Glud1	1.70E-07	0.34857792	0.557	0.268	0.002671054
Ccdc50	2.36E-06	0.348533443	0.271	0.096	0.037038647
Mafa	3.09E-09	0.34842581	0.157	0.027	4.86E-05
Mapre1	3.09E-06	0.347235265	0.457	0.223	0.048612114
Fat1	3.13E-07	0.34546802	0.429	0.173	0.004928337
Cox4i2	5.50E-09	0.343886217	0.157	0.028	8.65E-05
Lurap1l	2.18E-06	0.34285208	0.214	0.066	0.034267022
Steap2	5.00E-08	0.342750537	0.186	0.042	0.000786346
Ube2w	1.11E-06	0.340974392	0.186	0.051	0.017466755
Mrpl13	1.57E-06	0.339766247	0.343	0.14	0.024620659
Ccng2	2.20E-06	0.338920008	0.286	0.103	0.034666299
Scp2	3.16E-08	0.338848317	0.657	0.323	0.00049715
Eif1ax	2.70E-06	0.33835661	0.514	0.258	0.042513887
Dynlrb1	5.47E-09	0.338289662	0.714	0.346	8.61E-05
Amfr	1.89E-06	0.337035541	0.386	0.163	0.029682264
Reep1	7.24E-07	0.337021494	0.114	0.02	0.01138949
Myl12a	7.38E-08	0.335386582	0.914	0.658	0.001161086
Dnaja1	1.91E-08	0.334856785	0.543	0.237	0.000300041
Hikeshi	1.98E-06	0.33465947	0.2	0.058	0.031175429
Selenok	2.02E-06	0.334302429	0.543	0.278	0.031789624
Trir	7.85E-07	0.333037414	0.486	0.229	0.01234577
Il12rb2	1.86E-07	0.33295752	0.157	0.034	0.002927112
Kif26b	6.80E-10	0.332453764	0.143	0.021	1.07E-05
Rab32	7.12E-07	0.331862793	0.186	0.049	0.011193828
Sf3b6	2.44E-07	0.329580807	0.543	0.266	0.003833306
Nenf	1.01E-07	0.329070175	0.586	0.28	0.001594714
Ybx1	1.11E-06	0.328539484	0.571	0.295	0.017453403
Usmg5	1.95E-06	0.327046073	0.829	0.502	0.030715319
Tmod3	3.97E-07	0.326906251	0.386	0.154	0.006237292
Cpped1	1.88E-07	0.326249853	0.186	0.045	0.002960195
Rpl21	1.75E-07	0.326134228	1	0.956	0.002753224
Banf1	1.06E-06	0.326025074	0.514	0.244	0.016641389
Arl1	1.78E-06	0.325922429	0.457	0.214	0.028056521
Prelid1	2.00E-07	0.32589449	0.857	0.606	0.003138855
Tomm22	2.17E-06	0.323362747	0.4	0.179	0.034096308
Crcp	1.87E-06	0.323062447	0.186	0.051	0.029395165
Zfhx3	1.25E-07	0.322478634	0.186	0.044	0.001972526
Cox20	2.79E-06	0.321469626	0.343	0.137	0.043919393
Hcfc1r1	3.48E-07	0.320600994	0.586	0.283	0.005466853
Ndufb11	1.11E-07	0.319393083	0.629	0.309	0.001738491
Trim32	1.52E-06	0.317962096	0.157	0.039	0.023864322
Ucn2	6.65E-08	0.316041885	0.143	0.027	0.001046426
Rnf150	1.57E-12	0.315844431	0.129	0.013	2.47E-08
Rpl41	4.06E-07	0.31579548	1	0.994	0.006386209
Cfap36	2.80E-07	0.3154568	0.2	0.051	0.004398481
Eid1	2.12E-06	0.314781584	0.286	0.102	0.033287264
Megf6	6.90E-07	0.312052059	0.357	0.133	0.010847884
Mrpl33	1.05E-06	0.30978793	0.557	0.284	0.016503319
Ndufb5	1.97E-06	0.308017855	0.529	0.267	0.030907498
Tcp1	1.00E-06	0.30797112	0.586	0.296	0.015759941
Mtcl1	1.27E-07	0.306163293	0.143	0.027	0.001992206
Uckl1	1.66E-07	0.304620431	0.157	0.033	0.002608993
Prkar1a	8.26E-07	0.303156479	0.543	0.259	0.01298443
Ndufb2	2.11E-06	0.302892054	0.529	0.262	0.033198165
Ssr3	4.85E-07	0.29974528	0.6	0.307	0.007621982
Spsb4	6.93E-11	0.299460682	0.114	0.012	1.09E-06
Rps20	4.46E-07	0.293241839	1	0.992	0.007005386
C1qtnf1	2.76E-06	0.291892488	0.171	0.045	0.043340243
Cdc42	2.60E-06	0.289548336	0.8	0.469	0.040831736
Wdr1	1.38E-06	0.288877135	0.629	0.326	0.021653081
Rpl10	9.13E-07	0.273380384	0.9	0.734	0.014357906
Slc25a4	1.29E-06	0.267641238	0.571	0.272	0.020258553
Ap2m1	2.45E-06	0.259659921	0.586	0.311	0.038582132
Ctso	7.96E-07	0.256085632	0.114	0.02	0.012522951
