# Supplementary material for: Spatial transcriptomics reveals metabolic changes underly age-dependent declines in digit regeneration
Source: eLife. 2022 May 26;11:e71542. doi: 10.7554/eLife.71542 (PMC9135401; doi:10.7554/eLife.71542)
Supplement: Supplementary file 4. [file elife-71542-supp4.csv]

Table S4 Blastema enriched genes identified from published scRNAseq and spatial transcriptomics.
This publication	Storer et al	Johnson et al	Johnson et al (cycling cluster excluded)
Edil3	Adamts16	Aldh1a2	Cntn1
Mmp14	Ddah1	Aldh1a3	Gpm6a
Chrdl1	Matn3	Anln	Dio2
Ptx3	Npr3	Arhgap11a	Nov
Bmp5	Nell2	Asf1b	Aldh1a2
Runx2	Csgalnact1	Aspm	Epha5
P4ha3	Fbn2	Aurka	Sod3
Atp6v0d2	Capn6	Aurkb	Aldh1a3
S1pr1	C130050O18Rik	Birc5	Pappa2
Clec12a	Col9a2	Bub1	Chil1
Gldn	Lrrc17	Bub1b	Ntrk2
Col23a1	Lrrc75b	C330027C09Rik	Scara5
Pdgfrl	Colq	Ccna2	Steap1
Igsf10	Grem1	Ccnb1	Steap4
Cthrc1	Gm2115	Ccnb2	Ramp2
Omd	Cbr2	Cdc20	Cck
Col8a2	Cdkn2a	Cdc25c	Enpp2
Gng11	C1qtnf3	Cdca3	Acan
Clec11a	Bcat1	Cdca8	Meg3
Nsg1	Cpne4	Cdk1	Ly6c1
Mdk	Arxes1	Cdkn3	Fgf10
Tnn	Slitrk6	Cenpe	Medag
Rbp4	Jph2	Cenpf	Mgst1
Col11a1	Serpina3g	Cenph	Thy1
Gpx8	Arxes2	Cenpm	Ifitm1
Lox	Galnt3	Cenpn	Masp1
Gpr137b	Ydjc	Cenpp	Mmp13
Masp1	Prss35	Cenpw	Bdnf
Cdh11	Prkg2	Chil1	Nr4a3
Cd302	2900026A02Rik	Ckap2	Fibin
Alpl	Apol9a	Ckap2l	Bpgm
Rac2	Phldb2	Clspn	Slc26a7
Fndc1	Serinc2	Cntn1	Gldn
P3h3	Gjb5	Depdc1a	Vcan
Fcer1g	Pla1a	Diaph3	Igfbp2
Msx1	Camk4	Dio2	Eln
Mt3	Sorcs2	Dlgap5	Igfbp3
Grb10	Gzme	Ect2	Ly6a
Ltbp2	Sema4f	Efemp1	Crlf1
Ogn	Col9a1	Epha5	Smoc2
Col8a1	Brinp3	Esco2	Tnfaip3
Itm2a	Ly75	Foxm1	Ccl2
Thbs2	Col24a1	Gmnn	Col7a1
Tyrobp	Wnt7b	Gpm6a	Rgs3
Gpr153	Pdia5	Hist1h1b	Cxcl2
Emilin1	Lca5l	Hist1h2ae	Apod
P3h1	Gzmc	Hist1h2ak	Efemp1
Svep1	Cdkn2b	Hist1h2ap	Ntrk3
1500015O10Rik	Etv4	Hmmr	Sned1
Spon1	Tmtc4	Kif11	Prg4
Cyr61	Wbscr17	Kif15	Tspan2
Ppic	Hpgd	Kif20a	Gbp5
Aspn	Ccbe1	Kif20b	Nell2
Csrp2	Plekhg4	Kif22	Wnt11
Gpx7	Arsi	Kif23	Lgr5
Plat	Guca1a	Kif4	Parm1
Twist1	Pycr1	Knl1	Has1
Mfap2	Ccdc167	Knstrn	Tnfrsf11b
Adamts2	Reln	Lmnb1	Gas2
Vcan	Akap12	Lockd	Nfatc2
C1qtnf6	Nnmt	Mad2l1	Lama2
Prrx2	Gale	Mastl	Ccl7
Kctd12	Cnn1	Melk	Adgrg6
Col12a1	Fhod3	Mis18bp1	Sulf1
Scarf2	Sec16b	Mki67	Stmn2
Crispld2	Gper1	Mxd3	Kif26b
Tnc	Myo7a	Ncapd2	Steap2
Chil1	Adam12	Ncapg2	Hk2
Olfml3	Grb14	Ndc80	Dkk2
Mfap5	Pafah1b3	Nov	P4ha2
Olfml2b	Ibsp	Ntrk2	Bmp3
Fbln2	Aqp5	Ntrk3	Slit2
Fbln5	Gzmd	Nuf2	Spp1
Prrx1	Gm17501	Nusap1	Adamtsl3
Efemp2	Ajuba	Pappa2	Plpp3
Satb2	Ctxn1	Pbk	Col8a1
Dbn1	Fam20a	Pclaf	Maff
Svbp	H19	Pimreg	C1qtnf3
Epdr1	Serp2	Plk1	Serpina3n
Il1b	Them6	Prc1	Adamts4
Plekhg4	Fblim1	Prg4	Nfil3
Fgf10	Mcpt8	Racgap1	Csrnp1
Ocstamp	Amacr	Rrm2	F2r
Pappa2	Zfp518b	Sapcd2	Matn4
Ccr1	Far2os1	Scara5	Gpm6b
Cxcl5	Angpt1	Sgo2a	Vcam1
Oscar	Podnl1	Shcbp1	Bmp5
St8sia6	Impa2	Ska1	Ptn
Ostn	Angpt4	Smc2	Cxcl14
Mest	Rab38	Sod3	Ptgs2
Itgb2	Ucn2	Spag5	Rarres2
Slc9b2	Igdcc4	Spc24	Rcan1
Sp7	Adam19	Spc25	Irf1
Itga11	Gas2	Steap1	Mest
Inhba	Gm13715	Tacc3	Nsg1
Fndc3b	Gm15446	Tk1	Ndnf
Kdelr3	Ptges3l	Top2a	Serpine2
Spi1	Cxcr6	Tpx2	Igf1
Cd68	Myh10	Trip13	Nfkb1
Loxl2	Cdh10	Ube2c	Ptx3
