# Supplementary material for: Spatial transcriptomics reveals metabolic changes underly age-dependent declines in digit regeneration
Source: eLife. 2022 May 26;11:e71542. doi: 10.7554/eLife.71542 (PMC9135401; doi:10.7554/eLife.71542)
Supplement: Supplementary file 5. [file elife-71542-supp5.csv]

Table S5 Blastema DEGs differentially expressed between young and aged mice
	p_val	avg_logFC	pct.1	pct.2	p_val_adj
Krtap11-1	2.26E-13	1.71942054	0.596	0.154	3.56E-09
Krt87	1.31E-09	1.547365214	0.587	0.268	2.06E-05
Krt81	1.02E-09	1.461158394	0.606	0.26	1.61E-05
2310061N02Rik	1.81E-09	1.413582828	0.431	0.114	2.84E-05
Mt4	3.47E-05	1.289957068	0.532	0.317	0.545051384
Krt83	3.12E-10	1.243716796	0.514	0.146	4.91E-06
Prr9	8.96E-08	1.150786648	0.367	0.098	0.001409251
Krt33b	5.03E-06	1.079651171	0.495	0.26	0.079079525
Krtap1-5	6.35E-08	1.061551653	0.514	0.228	0.000998634
Krt34	6.34E-06	1.059240922	0.532	0.309	0.099631862
2310034C09Rik	6.55E-08	1.058580969	0.367	0.098	0.001030601
Lrrc15	3.08E-05	1.016937864	0.697	0.593	0.484542282
AC103674.4	3.67E-05	1.006819803	0.45	0.228	0.577720645
Krt35	4.17E-06	1.001103872	0.339	0.106	0.065495781
Krt31	0.000172994	1.000546326	0.358	0.163	1
Krt33a	1.48E-06	0.987426599	0.385	0.138	0.02332023
Krtap8-1	3.56E-05	0.981491968	0.495	0.285	0.559591384
Krtap9-3	4.64E-06	0.972842179	0.404	0.163	0.073034698
Krtap13-1	3.85E-06	0.96920512	0.376	0.138	0.060556502
Krtap13	8.52E-06	0.967303304	0.385	0.171	0.133944357
Sprr2b	0.000276926	0.96571864	0.174	0.033	1
Krt86	1.18E-05	0.917670445	0.431	0.179	0.184796816
Krtap7-1	2.12E-05	0.904205873	0.385	0.171	0.333839447
Gm10229	6.92E-05	0.885258969	0.413	0.211	1
Spink12	7.20E-07	0.867717417	0.798	0.545	0.01132871
Spink6	2.79E-08	0.858141951	0.752	0.415	0.000438616
Krt9	0.000348643	0.854296185	0.349	0.179	1
Krtap4-1	1.44E-05	0.8520356	0.404	0.171	0.226368217
1110025L11Rik	2.81E-06	0.83948858	0.495	0.236	0.044238728
Krt36	0.000309135	0.836765326	0.495	0.325	1
Ibsp	0.001171268	0.808277377	0.55	0.35	1
Rgs5	0.001397846	0.805758558	0.606	0.488	1
Krtap6-3	2.69E-05	0.767888756	0.413	0.179	0.422792266
Cybrd1	1.29E-05	0.767238993	0.33	0.122	0.202103925
Krtap3-3	0.000162887	0.765441135	0.45	0.252	1
Krtap6-1	4.10E-06	0.721804285	0.385	0.13	0.064431208
Gm10228	2.12E-05	0.704581075	0.404	0.179	0.333016168
Gja1	5.65E-06	0.690328693	0.789	0.61	0.088822993
Krtap1-3	4.69E-05	0.68765793	0.339	0.138	0.737004875
Klk14	3.29E-06	0.67625038	0.202	0.016	0.051680402
Slc38a4	2.69E-05	0.663675898	0.339	0.13	0.423345846
Igfbp5	5.34E-06	0.663094083	0.89	0.813	0.083952726
Fabp4	0.040966787	0.652173918	0.248	0.154	1
Krtap6-5	5.06E-05	0.648378184	0.459	0.211	0.796332983
Gm11938	0.003024066	0.641649748	0.376	0.244	1
Wfdc18	5.03E-05	0.636096138	0.706	0.48	0.790293812
Slc7a11	0.024098119	0.634655617	0.257	0.154	1
Krtap6-2	0.000729604	0.622401397	0.358	0.195	1
Spp1	0.002551934	0.61016416	0.44	0.276	1
Krt17	0.001980414	0.608939721	0.651	0.553	1
Krtap2-4	0.00519485	0.594852972	0.294	0.171	1
Slc38a2	1.73E-07	0.584625655	0.725	0.455	0.002726508
Krt1	0.001204492	0.584321045	0.468	0.301	1
Krtap3-2	0.00152397	0.572962475	0.33	0.171	1
Gm11562	0.000557643	0.569490436	0.349	0.179	1
Krtap22-2	0.000770548	0.558754114	0.459	0.276	1
Krt84	0.003557825	0.550403468	0.495	0.325	1
Serpinb2	0.00837453	0.53187721	0.156	0.057	1
Thbs1	1.93E-05	0.528279904	0.578	0.333	0.303763588
Krtap3-1	0.000644145	0.524119241	0.505	0.317	1
Slc39a10	0.000531902	0.523592663	0.349	0.179	1
Txndc17	1.83E-05	0.506591981	0.807	0.65	0.287860437
Selenop	0.000124716	0.504727102	0.523	0.366	1
Perp	0.000321745	0.497304815	0.725	0.65	1
Mt3	0.042668047	0.481374991	0.33	0.228	1
Sptssa	1.16E-05	0.474398795	0.495	0.244	0.182578794
Selenbp1	0.049391939	0.467408054	0.183	0.106	1
Chrdl1	0.000758693	0.46238787	0.211	0.065	1
Rps27rt	0.000376278	0.457674868	0.541	0.341	1
Pkp1	0.005581643	0.45211503	0.495	0.358	1
Dusp1	0.005000663	0.438694918	0.312	0.179	1
2310046K23Rik	0.008990517	0.438409118	0.147	0.049	1
Tmem14c	1.92E-05	0.435678619	0.394	0.163	0.301822236
1600014C10Rik	0.001554449	0.43214867	0.431	0.244	1
Ccnd2	0.00054692	0.431399436	0.321	0.154	1
Lbp	0.010911789	0.430938996	0.33	0.211	1
1810022K09Rik	0.000128485	0.429082979	0.587	0.35	1
Sox9	0.006509415	0.424219012	0.294	0.163	1
Ppp1cb	1.74E-06	0.421904215	0.67	0.39	0.027395333
Tacstd2	0.000417838	0.419905916	0.495	0.293	1
Ppp1r2	0.000139047	0.416515186	0.486	0.26	1
Lox	1.95E-05	0.416105449	0.706	0.463	0.307108248
Gng5	6.34E-08	0.411911086	0.917	0.789	0.000996655
Dynll1	6.55E-08	0.410838633	0.954	0.805	0.001030437
Mt1	0.001550063	0.408353984	0.734	0.561	1
Jup	0.001395068	0.406911258	0.505	0.35	1
Dazap2	3.86E-05	0.406837314	0.56	0.35	0.60675492
Atxn1	0.000407326	0.406370659	0.275	0.106	1
Aspn	0.001209913	0.403697738	0.798	0.789	1
Mob1a	9.78E-05	0.398746907	0.413	0.211	1
Adipor1	0.000598539	0.39851387	0.477	0.285	1
Gas1	0.000330056	0.396888231	0.541	0.317	1
Fndc1	0.001617479	0.396267024	0.679	0.642	1
Adk	0.000184295	0.395117019	0.376	0.171	1
Cap1	7.06E-05	0.395114256	0.55	0.309	1
Iffo2	0.026977516	0.39506795	0.349	0.236	1
Sdcbp	2.77E-07	0.388314001	0.688	0.431	0.004348281
Hprt	0.0021211	0.387958556	0.358	0.22	1
Hr	0.02286578	0.386673607	0.239	0.13	1
Pdcl3	0.000464178	0.386170408	0.349	0.171	1
Antxr1	0.000106577	0.385001947	0.587	0.415	1
Hoxc13	0.020353444	0.384930184	0.257	0.154	1
Mal	0.001775044	0.384568432	0.183	0.057	1
Dynlt3	0.000562745	0.383233648	0.349	0.154	1
Psors1c2	0.005604251	0.382257389	0.183	0.073	1
Lyz2	0.00680631	0.374094303	0.835	0.707	1
B4galt1	0.001199023	0.372395893	0.385	0.236	1
1500015O10Rik	0.002917363	0.372038963	0.771	0.699	1
Krtap4-8	0.00869032	0.370860192	0.257	0.138	1
Gm11563	0.046290636	0.369193009	0.202	0.122	1
Ltbp2	0.002108642	0.368725849	0.431	0.276	1
Krtdap	0.026505374	0.368076948	0.606	0.455	1
Fabp5	0.023413918	0.366499662	0.835	0.748	1
Tm2d1	0.002535981	0.365792344	0.22	0.081	1
Slc30a4	0.000420303	0.365288447	0.156	0.024	1
Tmem9b	0.001448744	0.363367751	0.33	0.179	1
Slc30a1	0.001809147	0.362520852	0.229	0.089	1
Lap3	0.010752909	0.362154849	0.202	0.098	1
Entpd1	0.009113291	0.361546215	0.22	0.106	1
Gm11595	0.013397213	0.361358846	0.138	0.049	1
Sncg	0.008690827	0.361202407	0.147	0.049	1
Col12a1	0.000161652	0.359207387	0.963	0.911	1
Zfp185	0.000366973	0.358543898	0.275	0.106	1
Mgp	0.008833348	0.358057714	0.486	0.341	1
Sat1	0.001075753	0.357129402	0.569	0.398	1
Hif1a	0.004519608	0.356948237	0.661	0.593	1
Eif3e	0.000192335	0.356554337	0.56	0.366	1
Dcaf7	0.002563886	0.3547033	0.229	0.089	1
Arg1	0.00553326	0.352989414	0.156	0.049	1
Thbd	0.035381405	0.3527322	0.183	0.098	1
Cyb5a	0.00127506	0.351677956	0.541	0.398	1
Bnip3	0.016603882	0.347633458	0.239	0.13	1
Itm2b	6.45E-06	0.347036878	0.991	0.911	0.10137916
Fam25c	0.000836991	0.345310523	0.615	0.472	1
Unc45a	0.007940082	0.344222562	0.294	0.154	1
Bambi	0.003251599	0.343606577	0.523	0.398	1
Ppp2ca	0.003893938	0.343205434	0.468	0.325	1
Nedd4	1.39E-05	0.340084559	0.798	0.659	0.217996949
Zbtb4	0.00092467	0.339962273	0.202	0.057	1
Glo1	0.000343119	0.336887969	0.651	0.472	1
Ube2d3	4.01E-05	0.336403013	0.633	0.463	0.630389637
Dstn	2.03E-05	0.334730548	0.761	0.61	0.319899034
2310050C09Rik	0.008940133	0.333334667	0.156	0.057	1
Polr2g	0.003827534	0.331874326	0.248	0.114	1
Krtap21-1	0.002583063	0.33170001	0.156	0.041	1
Sfr1	0.02486377	0.330721125	0.468	0.382	1
Snai2	0.008330181	0.329547952	0.376	0.252	1
Lgals7	0.001988321	0.328043127	0.844	0.756	1
Cbx3	0.001591835	0.326792404	0.44	0.268	1
Serpinb5	0.014419286	0.326024808	0.404	0.252	1
Ids	0.025581472	0.325293534	0.321	0.211	1
Tmsb4x	1.62E-06	0.324133502	1	1	0.025448501
Commd6	0.01032348	0.323596545	0.239	0.122	1
Pxdc1	0.015589009	0.322640009	0.202	0.098	1
Slc16a1	0.016413492	0.321425234	0.275	0.163	1
Klf5	0.043575761	0.320754573	0.284	0.187	1
Dbi	0.002304781	0.319864459	0.642	0.504	1
Ogt	0.002992702	0.319031976	0.257	0.122	1
Uqcrc2	0.00631788	0.317434169	0.321	0.195	1
Col4a6	0.005985915	0.316028501	0.128	0.033	1
Zfp260	0.00369115	0.315136143	0.257	0.122	1
Fam120a	0.001930292	0.312375999	0.477	0.293	1
Junb	0.002581553	0.311964452	0.431	0.26	1
Mtdh	0.025683962	0.311530695	0.284	0.179	1
H3f3a	1.40E-06	0.311317063	0.982	0.878	0.022078931
Serpina3n	0.043486217	0.31074009	0.22	0.122	1
Krt10	0.012428531	0.310693266	0.697	0.569	1
Gpx2	0.001641051	0.308574362	0.514	0.317	1
Idi1	0.005088595	0.307374217	0.128	0.033	1
2810004N23Rik	0.005189488	0.306985926	0.128	0.033	1
Cwh43	0.04089234	0.306820436	0.284	0.187	1
Ywhaz	0.000113073	0.30640771	0.743	0.585	1
Lypla1	0.018997343	0.305909426	0.266	0.163	1
Ralgps2	0.00676398	0.305493951	0.11	0.024	1
Acap2	0.015545733	0.303814533	0.22	0.114	1
En1	0.00729951	0.303501516	0.22	0.098	1
Dhx36	0.005258813	0.303305494	0.193	0.081	1
BC005537	0.000187503	0.302937808	0.596	0.398	1
Eif2s3x	0.005892861	0.302716338	0.367	0.236	1
Tax1bp1	0.012764798	0.301981013	0.404	0.285	1
Hist1h2bc	0.009262859	0.301759927	0.312	0.195	1
Lyg1	0.026466445	0.300968272	0.606	0.463	1
Fmod	0.022419154	0.300060945	0.89	0.878	1
Higd2a	0.004026868	0.300060737	0.404	0.252	1
Tmem128	0.019110156	0.299744675	0.22	0.114	1
Ndufa3	0.00013465	0.299622233	0.706	0.545	1
Ace	0.008540095	0.299574939	0.202	0.089	1
Hsbp1	0.002262093	0.299264271	0.55	0.431	1
Arcn1	0.001427706	0.299014949	0.376	0.228	1
Vldlr	0.015720944	0.298256355	0.183	0.081	1
Uqcrb	0.001724087	0.297774508	0.633	0.537	1
Calm2	1.89E-05	0.296995659	0.771	0.512	0.297469503
Mff	0.012809235	0.296580454	0.266	0.154	1
Emp1	0.000732202	0.296341754	0.67	0.472	1
Capn7	0.004577972	0.295845401	0.147	0.041	1
Fos	0.020592236	0.295808865	0.266	0.163	1
Txn1	0.005121423	0.295136516	0.853	0.789	1
Selenos	0.003621823	0.294820309	0.376	0.236	1
Arf1	3.24E-05	0.292894966	0.798	0.626	0.509628751
Atp2c1	0.037385531	0.289880283	0.229	0.138	1
Timm8b	0.008047477	0.289394088	0.394	0.268	1
Hipk3	0.00901878	0.288425468	0.248	0.13	1
Arpc2	0.000447094	0.288284316	0.642	0.48	1
Nbl1	0.016595492	0.287728499	0.358	0.228	1
Pam	0.017704786	0.286728342	0.358	0.244	1
Emg1	0.020529293	0.286574631	0.275	0.171	1
Stx7	0.012771366	0.286176141	0.257	0.146	1
Trip10	0.003758811	0.285440993	0.193	0.073	1
Acvr1	0.008133446	0.285426178	0.165	0.065	1
Sarnp	0.040561005	0.285289091	0.294	0.211	1
Ankrd40	0.00636321	0.28499077	0.202	0.081	1
Tspan14	0.01938658	0.284866289	0.183	0.081	1
Dusp14	0.010865475	0.284751629	0.193	0.089	1
Pten	0.012705591	0.284465662	0.294	0.179	1
Fam162a	0.02560242	0.284159312	0.642	0.577	1
Flii	0.009595065	0.284042012	0.275	0.146	1
Lpp	0.031435421	0.28393575	0.22	0.13	1
Fstl1	0.002853443	0.283402626	0.826	0.813	1
Olfml2a	0.024062446	0.283258649	0.165	0.073	1
Zbtb38	0.004966577	0.28321192	0.22	0.089	1
Zfp36l1	0.00056413	0.283202823	0.55	0.317	1
Polr2j	0.028079839	0.282167389	0.266	0.179	1
Slc48a1	0.00661837	0.280789438	0.284	0.163	1
Btbd1	0.009599702	0.280726633	0.257	0.138	1
Tnn	0.006811641	0.280596966	0.716	0.602	1
Actr2	0.005149677	0.280517441	0.495	0.341	1
Caprin1	0.002441523	0.279385073	0.385	0.244	1
Fam3c	0.025881221	0.278259941	0.211	0.114	1
Bri3	0.010374364	0.27752167	0.477	0.341	1
Etfa	0.004889767	0.277441328	0.358	0.22	1
Dusp11	0.005726132	0.277338695	0.275	0.154	1
Pls3	0.011654273	0.277204669	0.385	0.26	1
Hspa2	0.001946999	0.276897714	0.147	0.033	1
Slc44a1	0.009677154	0.276834575	0.376	0.236	1
Dvl3	0.016643001	0.276268051	0.202	0.098	1
mt-Atp6	0.000518356	0.275893511	1	0.992	1
Sel1l	0.011759347	0.275560269	0.229	0.122	1
Cd109	0.009614257	0.27516195	0.294	0.163	1
Sumo2	0.000616831	0.274074617	0.706	0.537	1
App	2.75E-05	0.273335306	0.917	0.756	0.431903675
1110004F10Rik	0.001604865	0.273326402	0.459	0.285	1
Gpc3	0.020059713	0.272568299	0.257	0.13	1
Tulp4	0.014194839	0.272393536	0.239	0.13	1
Mtx2	0.022864998	0.272146741	0.202	0.106	1
Cttn	0.008786953	0.27214079	0.413	0.276	1
Slc2a1	0.049857786	0.271295712	0.413	0.317	1
Cd44	0.020806152	0.271091519	0.532	0.431	1
9530068E07Rik	0.002209472	0.270428555	0.505	0.374	1
Mfap3l	0.014545674	0.270413203	0.138	0.049	1
Scara5	0.003860819	0.269871329	0.138	0.033	1
Pcbp2	0.000260736	0.269841019	0.743	0.61	1
Nr2f2	0.049887649	0.269643971	0.193	0.114	1
Dusp7	0.025415966	0.269025781	0.275	0.179	1
Tmem30a	0.011240897	0.268403295	0.376	0.276	1
Pnrc1	0.009673589	0.267686186	0.275	0.154	1
Rab10	0.006533387	0.266653481	0.376	0.228	1
Rbbp8	0.027216493	0.266397716	0.128	0.049	1
Ifi202b	0.017531182	0.26626349	0.248	0.138	1
Trp63	0.03095715	0.266169311	0.385	0.268	1
Selenok	0.003320081	0.26599917	0.578	0.455	1
Pdlim5	0.044815526	0.265944364	0.257	0.171	1
Fhl2	0.034089579	0.264490387	0.275	0.187	1
Snrnp200	0.033173493	0.264465718	0.257	0.171	1
Ppp1r14c	0.045448867	0.263470112	0.128	0.057	1
Ostf1	0.006965715	0.263032392	0.44	0.317	1
Ntrk2	0.02200639	0.262709773	0.183	0.089	1
Mdk	0.040546991	0.262564492	0.523	0.48	1
Zfand6	0.026190594	0.261651066	0.211	0.114	1
Kcnk3	0.018591221	0.261569013	0.11	0.033	1
Ube2r2	0.005195532	0.261449348	0.349	0.195	1
Tmed2	0.000150793	0.261440663	0.743	0.569	1
Anxa3	0.01098833	0.26108391	0.257	0.138	1
Tbx18	0.03534363	0.260737291	0.165	0.081	1
Tspan31	0.018001941	0.259336262	0.321	0.22	1
Epdr1	0.033895374	0.257657113	0.22	0.122	1
Trabd	0.038067702	0.256964619	0.174	0.089	1
Lancl1	0.009702117	0.256880228	0.284	0.154	1
Cops9	0.001000354	0.256357912	0.679	0.602	1
Mpc1	0.009813515	0.256143414	0.376	0.236	1
Msn	0.00073736	0.256137553	0.67	0.512	1
St8sia6	0.01771724	0.256089233	0.11	0.033	1
Vsnl1	0.005220649	0.255648935	0.101	0.016	1
Pdcl	0.021487744	0.2556448	0.174	0.081	1
Actr10	0.016700431	0.25519412	0.321	0.211	1
Rab18	0.001668959	0.254720532	0.486	0.325	1
Fn1	0.014787539	0.254394427	0.936	0.935	1
Stk25	0.01444238	0.254297485	0.165	0.065	1
Spint2	0.044073976	0.25393135	0.211	0.122	1
Zbtb8os	0.020184807	0.253844815	0.202	0.106	1
Fubp3	0.015009967	0.253709783	0.183	0.081	1
Tmem64	0.028837176	0.253620451	0.183	0.098	1
Fndc3b	0.013061926	0.253305513	0.358	0.244	1
Hs2st1	0.011710097	0.25321001	0.266	0.146	1
Nudt22	0.023094758	0.252763011	0.248	0.146	1
Rit1	0.030139623	0.25220556	0.174	0.089	1
Cpne8	0.009721993	0.251493675	0.119	0.033	1
Sike1	0.020947672	0.250171132	0.165	0.073	1
Fam174a	0.011977065	0.249604849	0.183	0.081	1
Pgap1	0.007347755	0.249276124	0.11	0.024	1
Cdc42	0.001545901	0.24915779	0.716	0.626	1
Cd81	0.002116017	0.24905849	0.725	0.65	1
mt-Cytb	0.002616411	0.24903983	1	0.951	1
Tma7	0.000931456	0.248173593	0.697	0.537	1
Mbnl2	0.049238694	0.247719582	0.33	0.236	1
Rpl22l1	0.00344217	0.24707112	0.835	0.74	1
Tes	0.017979871	0.246892331	0.147	0.057	1
Mxra8	0.003723665	0.24533159	0.725	0.675	1
Ndufb4	0.001056148	0.245181758	0.606	0.463	1
Sorcs2	0.021341552	0.244993755	0.165	0.073	1
Gsto1	0.013489456	0.244421918	0.569	0.48	1
Mtpn	0.005210601	0.243945615	0.44	0.293	1
2900097C17Rik	0.003705195	0.243540201	0.495	0.366	1
Sp8	0.047310726	0.242952501	0.211	0.114	1
Fam26e	0.043421215	0.242666787	0.119	0.049	1
Wfdc2	0.012160447	0.242574954	0.101	0.024	1
Vps4b	0.008500072	0.242528218	0.33	0.195	1
Smad7	0.030139623	0.240690813	0.174	0.089	1
Celf1	0.025702821	0.240311661	0.239	0.146	1
Ktn1	0.043351061	0.239666809	0.202	0.114	1
Fcer1g	0.040837304	0.23957756	0.459	0.407	1
Eif4b	0.018005209	0.239505929	0.505	0.407	1
Diaph1	0.042188631	0.239079451	0.165	0.081	1
Sptbn1	0.024741455	0.238835722	0.385	0.301	1
Idh3b	0.045836662	0.238467866	0.321	0.228	1
Cpq	0.044215208	0.238137565	0.229	0.13	1
Arl4a	0.026348635	0.237904768	0.138	0.057	1
Foxp1	0.046240251	0.237839922	0.248	0.154	1
Vezf1	0.028273526	0.237109719	0.239	0.138	1
Ndufa6	0.001153126	0.236137367	0.706	0.52	1
Efhd2	0.035083081	0.235279044	0.339	0.26	1
Jpt2	0.044189372	0.23498585	0.128	0.057	1
Bmpr1a	0.038154475	0.2349124	0.202	0.114	1
Ptpn12	0.044327306	0.234852132	0.202	0.114	1
Trappc3	0.028764775	0.233505831	0.284	0.171	1
Usmg5	0.00547329	0.233215901	0.78	0.683	1
Klf10	0.033333554	0.232941155	0.211	0.114	1
Vgll3	0.042188631	0.232698129	0.165	0.081	1
Sp3	0.034281983	0.232682478	0.202	0.114	1
Mettl9	0.02753499	0.232381201	0.358	0.26	1
Cst3	0.046268342	0.231981081	0.89	0.935	1
Sqle	0.024278862	0.231771167	0.128	0.049	1
Actr3	0.003975588	0.23172584	0.56	0.439	1
Dsc3	0.034521949	0.231719415	0.33	0.211	1
Ptges3	0.025353314	0.231288997	0.431	0.317	1
Mrpl36	0.013277641	0.231105005	0.394	0.252	1
Atraid	0.037530526	0.230966715	0.312	0.228	1
Slc25a24	0.047849303	0.230507741	0.174	0.098	1
Ncstn	0.019321781	0.229954294	0.33	0.228	1
Lrrc58	0.010506887	0.229639948	0.45	0.366	1
Etfrf1	0.028288033	0.229475216	0.101	0.033	1
Tab2	0.046955588	0.229042748	0.229	0.146	1
Pcnp	0.029860321	0.228319452	0.312	0.211	1
Wif1	0.048054049	0.227161991	0.211	0.122	1
Ankrd11	0.018071752	0.227048616	0.147	0.057	1
Tenm2	0.027076439	0.226116899	0.128	0.049	1
Tra2b	0.024392898	0.226087893	0.404	0.276	1
Prdx1	0.000936156	0.225727933	0.936	0.87	1
Rhoa	0.000863709	0.225335659	0.661	0.512	1
Dctn1	0.037248878	0.224701166	0.22	0.13	1
Copa	0.022773192	0.224339373	0.514	0.423	1
Htra1	0.005138084	0.224081972	0.624	0.423	1
Tmco6	0.018369261	0.22349326	0.11	0.033	1
Amfr	0.025158942	0.223351764	0.284	0.179	1
Prrc2b	0.046051679	0.222920485	0.294	0.203	1
Ybx3	0.021335501	0.222752723	0.422	0.301	1
Lztfl1	0.031933822	0.222481707	0.147	0.065	1
Manbal	0.046502739	0.222448121	0.266	0.171	1
Pqlc3	0.019662088	0.221711014	0.22	0.114	1
St8sia4	0.028927322	0.221662421	0.119	0.041	1
Dlg5	0.035663911	0.221490653	0.147	0.065	1
Dpy30	0.028658864	0.221066983	0.294	0.195	1
Pgrmc1	0.029991383	0.220408295	0.339	0.244	1
L3hypdh	0.049410222	0.219751539	0.128	0.057	1
Ptp4a1	0.016919346	0.219645901	0.422	0.293	1
Anxa7	0.009830989	0.218692205	0.45	0.317	1
Bclaf1	0.04454146	0.218660112	0.193	0.106	1
Fat1	0.038510026	0.218212311	0.376	0.293	1
Atp6v0e	0.012173681	0.217594295	0.633	0.545	1
Skap2	0.041006944	0.217165798	0.156	0.073	1
Mid2	0.027632707	0.216981597	0.101	0.033	1
Arpc5l	0.039190329	0.2165645	0.22	0.13	1
Tspan3	0.008001027	0.216533524	0.532	0.39	1
Lima1	0.020775577	0.216450637	0.459	0.341	1
Smim15	0.046741708	0.21596142	0.156	0.081	1
Ccdc43	0.022475291	0.215866777	0.11	0.033	1
mt-Co1	0.004100041	0.215703391	1	1	1
Wdr1	0.004172184	0.214025111	0.615	0.463	1
Nptn	0.009169347	0.213826236	0.55	0.407	1
Csnk1d	0.041308249	0.213595214	0.312	0.203	1
C1d	0.032432539	0.213589801	0.385	0.293	1
Wasf2	0.017698334	0.213359018	0.33	0.211	1
Jun	0.049504974	0.213265607	0.303	0.203	1
Rtn4	0.026341774	0.212536367	0.624	0.512	1
Abracl	0.032238936	0.211868874	0.44	0.366	1
Serinc1	0.013865632	0.211752034	0.486	0.382	1
Eif4e	0.033182093	0.211542831	0.239	0.154	1
Rest	0.045156667	0.210877891	0.138	0.065	1
Rab22a	0.040995171	0.210637959	0.229	0.138	1
Sacm1l	0.027982665	0.210099526	0.193	0.098	1
Gabpa	0.048933122	0.210085853	0.138	0.065	1
Yipf3	0.028286877	0.209957999	0.367	0.268	1
Btg1	0.002273423	0.20990605	0.569	0.39	1
Lamp2	0.016612205	0.209663318	0.56	0.439	1
Ssx2ip	0.049807153	0.209286717	0.138	0.065	1
Rpl17	0.000256854	0.208928008	0.991	0.992	1
Rpl23a	0.001585951	0.208213607	0.991	0.992	1
Cd9	0.0009497	0.207656932	0.844	0.691	1
Ddr1	0.045219397	0.207569411	0.239	0.138	1
Usf3	0.039120653	0.206536127	0.119	0.049	1
Syngr2	0.035168744	0.2052295	0.376	0.26	1
Rcn2	0.028799847	0.205143363	0.339	0.22	1
Arpc5	0.003648295	0.204004126	0.615	0.553	1
Alkbh5	0.021088039	0.203564009	0.22	0.106	1
Ctnnb1	0.000832192	0.203077443	0.881	0.715	1
Smim8	0.04560544	0.202824581	0.119	0.049	1
Sh3glb1	0.028746468	0.202645973	0.523	0.431	1
Tpd52	0.030916811	0.202174726	0.294	0.187	1
Steap2	0.044284063	0.201977211	0.119	0.049	1
Got1	0.048058538	0.201524096	0.128	0.057	1
Uba1	0.018141669	0.201452445	0.376	0.236	1
Cox20	0.041365039	0.201046723	0.284	0.195	1
Afap1l2	0.04254922	0.199877703	0.11	0.041	1
Srsf6	0.037470312	0.199821608	0.44	0.366	1
Sem1	0.000558082	0.199751364	0.927	0.878	1
Cox7a2l	0.019050139	0.199431752	0.578	0.488	1
Nfkbib	0.031770577	0.198234629	0.101	0.033	1
Tm9sf3	0.011959898	0.197565083	0.55	0.439	1
Rpl12	0.001753525	0.197452024	0.991	0.984	1
Mapk1	0.019387769	0.19713703	0.358	0.228	1
Ctdsp2	0.005255771	0.196840349	0.486	0.358	1
Polr2k	0.034899408	0.196244709	0.404	0.293	1
Tram1	0.02641496	0.195067584	0.44	0.35	1
Pet100	0.009226903	0.194693171	0.431	0.276	1
Tpt1	0.000193878	0.193284975	1	0.984	1
BC031181	0.025189889	0.193259122	0.33	0.228	1
Prkar1a	0.010334506	0.193178385	0.587	0.447	1
Nop10	0.043815475	0.19305881	0.413	0.317	1
Ypel3	0.018705349	0.191454725	0.422	0.285	1
Zfand5	0.021803338	0.190010398	0.376	0.268	1
Klk8	0.036396844	0.189341401	0.165	0.073	1
Mrpl21	0.041217609	0.18866423	0.22	0.13	1
mt-Co3	0.013234815	0.188098389	1	0.992	1
Sqstm1	0.01870881	0.187994954	0.477	0.366	1
Rac1	0.000511898	0.187662985	0.853	0.813	1
Rps27	0.002468596	0.185809777	0.991	0.976	1
Serinc3	0.03137699	0.182640767	0.569	0.472	1
Eif4g2	0.000422709	0.181663826	0.844	0.707	1
Cd151	0.041815784	0.181507193	0.376	0.301	1
Ctsb	0.031563468	0.1809243	0.945	0.878	1
Paip2	0.010881269	0.180910015	0.45	0.325	1
Nckap1	0.047184465	0.180797821	0.33	0.228	1
Ywhaq	0.001389356	0.180676495	0.697	0.569	1
Slc31a1	0.034920564	0.180250086	0.22	0.122	1
Csde1	0.011422526	0.179907621	0.505	0.407	1
Rtraf	0.014794355	0.179884884	0.523	0.439	1
Ndufs5	0.017669518	0.179848142	0.587	0.512	1
Palld	0.037018785	0.177120355	0.422	0.325	1
S100a16	0.011506887	0.176790877	0.532	0.39	1
Calm1	0.008818437	0.176253283	0.872	0.764	1
Morf4l1	0.015345602	0.176060181	0.771	0.667	1
Rps27l	0.006083006	0.175327186	0.826	0.667	1
Chchd2	0.003829058	0.175122501	0.872	0.813	1
Rpl26	0.009213318	0.174935927	0.963	0.927	1
Atp5f1	0.008560744	0.173030572	0.67	0.569	1
Skp1a	0.007805728	0.17250485	0.45	0.317	1
Csnk1a1	0.020023049	0.171906091	0.495	0.333	1
Uqcrh	0.013022082	0.17108702	0.872	0.74	1
Srp9	0.014900472	0.170938927	0.477	0.35	1
Tpm4	0.002122485	0.168211951	0.734	0.553	1
S100a10	0.023142555	0.16811363	0.853	0.764	1
Cald1	0.036725223	0.166568609	0.578	0.463	1
Dynlrb1	0.023439342	0.165942655	0.532	0.455	1
Rpl37	0.000136688	0.164971164	1	1	1
Vdac2	0.046699076	0.164803864	0.486	0.431	1
Rps26	0.003282738	0.163691875	1	1	1
Gpx8	0.046785979	0.161863479	0.495	0.415	1
Rap1a	0.038853858	0.160530973	0.358	0.26	1
Dkk3	0.040442953	0.160069481	0.541	0.431	1
Ywhae	0.020964959	0.15793295	0.688	0.577	1
Srp14	0.033049527	0.149989466	0.459	0.35	1
Ssr3	0.046050139	0.149675388	0.688	0.585	1
Kctd1	0.03993226	0.146905556	0.321	0.228	1
Ost4	0.027303148	0.145034707	0.835	0.707	1
Ctnna1	0.035874848	0.144137377	0.477	0.39	1
Sri	0.026555864	0.143144978	0.55	0.463	1
Atp1b3	0.014213339	0.140778506	0.679	0.528	1
Ywhah	0.026685623	0.139355015	0.505	0.423	1
Rpl7	0.007890126	0.138018486	1	0.967	1
Eef1a1	0.00034377	0.135655772	1	1	1
Anxa1	0.005954617	0.133095768	0.853	0.74	1
Marcks	0.038504326	0.132676124	0.697	0.585	1
Myl12a	0.013587945	0.13106353	0.945	0.854	1
Tmem123	0.046746164	0.128333687	0.44	0.35	1
Rpl34	0.005786779	0.127037512	1	1	1
S100a6	0.033213047	0.124409273	1	0.992	1
Rpl39	0.033456702	0.124036168	1	0.992	1
Ppic	0.014800158	0.121806809	0.789	0.675	1
Wls	0.045117962	0.12097924	0.468	0.366	1
Aff4	0.037847875	0.120494545	0.266	0.154	1
Rps28	0.046877851	0.119173728	1	0.976	1
Clta	0.033537172	0.113514602	0.642	0.561	1
Eif1	0.011711294	0.105727098	0.872	0.813	1
Romo1	0.003412749	0.105017023	0.706	0.593	1
Tomm7	0.036827413	0.104841477	0.606	0.561	1
Myl6	0.018333334	-0.115825559	0.982	0.992	1
Eef2	0.045696836	-0.148051976	0.991	0.984	1
Rpl14	0.009760248	-0.151297783	1	0.992	1
Plin3	0.049894928	-0.153433612	0.037	0.106	1
Gnl2	0.048891107	-0.156267602	0.037	0.106	1
Actb	0.023289438	-0.163066576	1	1	1
Socs2	0.047150951	-0.164558622	0.046	0.122	1
Ctla2a	0.007889272	-0.168164317	0.266	0.472	1
Osmr	0.033764151	-0.170928388	0.101	0.22	1
Aurkb	0.035177636	-0.173138461	0.037	0.114	1
Kat6a	0.049894928	-0.174417985	0.037	0.106	1
Pcyt2	0.034994445	-0.176287919	0.037	0.114	1
Tcirg1	0.04013804	-0.177522131	0.257	0.439	1
Dpm1	0.03724455	-0.18067157	0.037	0.114	1
Psen1	0.043167221	-0.180706793	0.055	0.138	1
Trpv4	0.036292793	-0.182080247	0.037	0.114	1
Pfkfb3	0.046455494	-0.182149633	0.037	0.106	1
Pnkp	0.047174956	-0.182786479	0.037	0.106	1
Sil1	0.049894659	-0.184076628	0.037	0.106	1
Babam2	0.046704733	-0.184709859	0.046	0.122	1
Slc25a16	0.038218339	-0.185077391	0.037	0.114	1
Cln6	0.045980832	-0.185186886	0.037	0.106	1
Ncoa2	0.049368616	-0.18531735	0.055	0.138	1
Mthfd1	0.045822954	-0.185368724	0.046	0.122	1
Ppid	0.036684826	-0.185584293	0.083	0.187	1
Gmds	0.048395324	-0.186236369	0.037	0.106	1
Ift22	0.035823527	-0.188219097	0.046	0.13	1
Glul	0.032231343	-0.188539521	0.055	0.146	1
Rps15	0.002659104	-0.189337553	1	0.992	1
Wdr48	0.035177636	-0.189559941	0.037	0.114	1
Ncam1	0.046262075	-0.190338183	0.046	0.122	1
Rcc1	0.046704733	-0.190949271	0.046	0.122	1
Bcl2l1	0.034091658	-0.192030438	0.037	0.114	1
Alg2	0.042771284	-0.192876926	0.037	0.106	1
Cc2d1a	0.045974085	-0.193223601	0.055	0.138	1
Kcnab2	0.040596271	-0.193972387	0.037	0.106	1
Mfsd10	0.037765988	-0.195612407	0.092	0.203	1
Hps1	0.034450356	-0.195731399	0.037	0.114	1
Ngrn	0.044351915	-0.19590128	0.055	0.138	1
Fam53a	0.034812475	-0.196475197	0.037	0.114	1
Zfp592	0.031004607	-0.197258436	0.037	0.114	1
Nme2	0.043075346	-0.197339268	0.073	0.171	1
Tmem110	0.022083373	-0.198196804	0.028	0.106	1
Tomm6	0.034812475	-0.198447989	0.037	0.114	1
Rom1	0.042434816	-0.198796552	0.046	0.122	1
Smap2	0.041720008	-0.199056407	0.064	0.154	1
Srrm1	0.039710056	-0.199404232	0.092	0.195	1
Rogdi	0.049894928	-0.199991425	0.037	0.106	1
Paxip1	0.023413355	-0.200161823	0.028	0.106	1
Nmt2	0.023413355	-0.200350533	0.028	0.106	1
Taok2	0.030352342	-0.200661816	0.037	0.114	1
Kat8	0.022607099	-0.201225799	0.028	0.106	1
Tsc2	0.035017407	-0.20150141	0.055	0.146	1
Gpaa1	0.046704511	-0.202252606	0.046	0.122	1
Drg2	0.038256922	-0.202292605	0.064	0.154	1
Podnl1	0.042009381	-0.202414419	0.055	0.138	1
Nsmf	0.035304237	-0.202518416	0.073	0.171	1
Gfer	0.033754828	-0.202625207	0.055	0.146	1
Arid5a	0.037381407	-0.202741292	0.046	0.122	1
Armc8	0.031669249	-0.203400663	0.037	0.114	1
Sdf2l1	0.047904294	-0.203422762	0.037	0.106	1
Ciz1	0.038760239	-0.203756461	0.064	0.154	1
Hpf1	0.044864933	-0.204258278	0.073	0.171	1
Cbr3	0.042392373	-0.204410182	0.055	0.138	1
Ppp2r3d	0.034698001	-0.205033639	0.055	0.146	1
Thoc2	0.03062326	-0.205095854	0.046	0.13	1
Unc119	0.020332019	-0.20532089	0.028	0.106	1
Tmem11	0.049390878	-0.20534362	0.037	0.106	1
Esrra	0.031335511	-0.205383173	0.037	0.114	1
Polr3d	0.022873241	-0.205671876	0.028	0.106	1
Rptor	0.030677079	-0.206016806	0.037	0.114	1
Rpp25l	0.042026588	-0.207600024	0.046	0.122	1
Ecsit	0.031335511	-0.208344436	0.037	0.114	1
Rpl21	0.014562013	-0.208875045	0.991	0.984	1
Fbxo7	0.028772421	-0.209262918	0.037	0.114	1
Actg2	0.045980832	-0.209296771	0.037	0.106	1
Slc35a1	0.044955241	-0.209537895	0.046	0.122	1
Cisd3	0.021067187	-0.209861341	0.028	0.106	1
Meaf6	0.046455494	-0.209916485	0.037	0.106	1
Pde4b	0.037565838	-0.210101057	0.046	0.122	1
Adsl	0.032345878	-0.210337583	0.037	0.114	1
Amdhd2	0.032231195	-0.210591941	0.055	0.146	1
Cdc25b	0.022649068	-0.210835634	0.037	0.122	1
Pigt	0.014775113	-0.211404998	0.046	0.146	1
Ranbp2	0.01594026	-0.211498278	0.055	0.163	1
Myct1	0.043679677	-0.211611595	0.046	0.122	1
Zfp414	0.022895064	-0.211979012	0.037	0.122	1
Gins4	0.045156859	-0.212299206	0.055	0.138	1
Slitrk6	0.019854431	-0.212620416	0.028	0.106	1
Speg	0.019854431	-0.21308113	0.028	0.106	1
Lrrcc1	0.028847839	-0.213388629	0.046	0.13	1
Stxbp1	0.029082759	-0.213624886	0.037	0.114	1
Slc12a4	0.032255388	-0.214495595	0.128	0.252	1
Eml3	0.045823627	-0.214939131	0.073	0.163	1
Hcls1	0.03940959	-0.215246859	0.055	0.138	1
Ptges2	0.049894928	-0.215626263	0.037	0.106	1
Yeats2	0.014944269	-0.215885711	0.028	0.114	1
Ing4	0.048128719	-0.216072213	0.073	0.163	1
Zfp703	0.044939718	-0.216338898	0.083	0.179	1
Ncln	0.041496339	-0.216396878	0.165	0.301	1
Senp2	0.031335511	-0.216453159	0.037	0.114	1
Arhgef5	0.022405371	-0.21669946	0.037	0.122	1
Arih2	0.049316981	-0.21678702	0.073	0.163	1
Clasrp	0.028560695	-0.217334764	0.046	0.13	1
Kif20a	0.027079178	-0.217396353	0.064	0.163	1
Pa2g4	0.041183603	-0.217660082	0.083	0.179	1
Ccnb2	0.049312836	-0.217818264	0.101	0.203	1
Tnfsf12	0.03564651	-0.217822184	0.073	0.163	1
Nudt5	0.010847111	-0.2180374	0.046	0.154	1
Mdga1	0.021317337	-0.218787665	0.028	0.106	1
Twf2	0.043703213	-0.21947831	0.092	0.195	1
Tbrg4	0.013245045	-0.219517771	0.028	0.114	1
Dcps	0.049317322	-0.220633658	0.073	0.163	1
S100a4	0.032218758	-0.221005845	0.798	0.902	1
Znhit2	0.032438566	-0.221109958	0.073	0.171	1
Mmp2	0.009073003	-0.22112747	0.826	0.919	1
Pds5b	0.047600749	-0.221406802	0.046	0.122	1
Sema7a	0.014072094	-0.221471067	0.028	0.114	1
Thoc1	0.014415423	-0.221600994	0.028	0.114	1
Ruvbl2	0.016501302	-0.221763807	0.037	0.13	1
Tmem268	0.04062366	-0.221945035	0.046	0.122	1
Naa10	0.049442712	-0.22235925	0.119	0.236	1
Nolc1	0.031753946	-0.222526465	0.073	0.171	1
Zfp865	0.023413182	-0.222829404	0.028	0.106	1
Eml1	0.016411512	-0.222932854	0.073	0.187	1
Prim1	0.032006031	-0.22293411	0.037	0.114	1
Sptlc1	0.026712379	-0.223011404	0.055	0.146	1
Pip5k1c	0.02157007	-0.223046476	0.028	0.106	1
Ccnk	0.020091986	-0.22307314	0.028	0.106	1
Atp6v0b	0.014444372	-0.223217237	0.385	0.585	1
Ahnak2	0.027993785	-0.223241631	0.046	0.13	1
Nol6	0.013736002	-0.223910299	0.028	0.114	1
Dll4	0.02157007	-0.224064656	0.028	0.106	1
Tanc1	0.02942959	-0.224504847	0.046	0.13	1
Fam58b	0.021118148	-0.22599428	0.046	0.138	1
Cdk19	0.019871607	-0.22631805	0.037	0.122	1
Gabpb1	0.008536488	-0.22663213	0.018	0.106	1
Matk	0.013570519	-0.227360389	0.028	0.114	1
Robo1	0.014072094	-0.227429455	0.028	0.114	1
Dcaf15	0.02307477	-0.22805429	0.046	0.13	1
Cry2	0.007868258	-0.22836593	0.018	0.106	1
Ctps	0.023061966	-0.228648011	0.064	0.171	1
Uhrf1	0.027571135	-0.229070126	0.064	0.163	1
Med24	0.021924809	-0.229428262	0.037	0.122	1
Ogfod2	0.00808566	-0.229649259	0.018	0.106	1
Tab1	0.019056435	-0.229807286	0.046	0.138	1
Gjb3	0.008421722	-0.229816727	0.018	0.106	1
Chst14	0.024040071	-0.230335535	0.055	0.146	1
Gtpbp1	0.044955241	-0.230813238	0.046	0.122	1
Mtap	0.048036148	-0.231058295	0.083	0.179	1
Cul7	0.032074133	-0.231426184	0.092	0.203	1
Ap5s1	0.037865804	-0.231894106	0.101	0.203	1
Kifc3	0.025467506	-0.232131544	0.055	0.146	1
Lbh	0.020669191	-0.232263904	0.064	0.171	1
Ift172	0.022904861	-0.233107515	0.046	0.138	1
Magt1	0.043679677	-0.233142632	0.046	0.122	1
Rabl6	0.045910218	-0.233211396	0.092	0.195	1
Tmtc2	0.045822954	-0.233648328	0.046	0.122	1
Armcx2	0.028024072	-0.233830989	0.092	0.195	1
Tpi1	0.030384984	-0.234108297	0.532	0.691	1
Pgp	0.020759269	-0.234116627	0.055	0.154	1
Ppp1r16a	0.022405371	-0.234189246	0.037	0.122	1
Mrps18b	0.018090587	-0.234370345	0.055	0.163	1
AC160336.1	0.048517422	-0.234577767	0.211	0.374	1
Fhl3	0.015565514	-0.23475735	0.046	0.146	1
Dapk3	0.035665587	-0.234784898	0.064	0.154	1
Cdk10	0.014206886	-0.23479433	0.037	0.13	1
Elp3	0.047195645	-0.235198008	0.101	0.203	1
Tysnd1	0.021453241	-0.235436785	0.037	0.122	1
Hmgcl	0.048005777	-0.235554423	0.064	0.146	1
Vat1	0.024839655	-0.235785139	0.073	0.179	1
Metrn	0.009675097	-0.235848989	0.037	0.138	1
Arrb2	0.020091986	-0.236913243	0.028	0.106	1
Slc1a5	0.029320992	-0.237292058	0.101	0.22	1
Cdkn2d	0.044221729	-0.237526865	0.092	0.187	1
St3gal3	0.011719134	-0.237989603	0.028	0.114	1
Tle2	0.013507339	-0.23828464	0.037	0.13	1
Hnrnpul1	0.03532637	-0.238406366	0.128	0.244	1
Lig3	0.007656266	-0.238415473	0.018	0.106	1
Atic	0.011575463	-0.23866324	0.028	0.114	1
Tsku	0.008085576	-0.238755116	0.018	0.106	1
Nasp	0.023364564	-0.238848967	0.073	0.179	1
Ppdpf	0.045183738	-0.23911353	0.202	0.358	1
Mrps12	0.034131672	-0.239118639	0.128	0.252	1
Zkscan17	0.032006031	-0.239557102	0.037	0.114	1
Bptf	0.026085163	-0.239591778	0.083	0.187	1
Uhrf2	0.024094829	-0.239878957	0.083	0.195	1
Gga1	0.049409587	-0.240851536	0.138	0.252	1
Tbx2	0.032570911	-0.240946886	0.211	0.366	1
Hist1h4i	0.019655638	-0.241022255	0.046	0.138	1
Grk6	0.041146896	-0.241057196	0.073	0.163	1
Fdxr	0.013660034	-0.241655175	0.037	0.13	1
Ergic1	0.045890379	-0.241874611	0.165	0.285	1
Ptbp2	0.013356061	-0.2421976	0.037	0.13	1
Aldh16a1	0.038257077	-0.24226329	0.064	0.154	1
Ppp1r7	0.034450557	-0.242303828	0.037	0.114	1
Crcp	0.012338408	-0.242444619	0.037	0.13	1
Skiv2l	0.02871771	-0.242933666	0.083	0.187	1
Cdip1	0.006858284	-0.243103045	0.018	0.106	1
Pold2	0.008585541	-0.243861369	0.028	0.122	1
Sharpin	0.022982271	-0.243937099	0.064	0.163	1
Nat6	0.012911174	-0.244016607	0.037	0.13	1
Slc25a1	0.046165918	-0.244052172	0.101	0.203	1
Fkbp4	0.031509632	-0.244063408	0.138	0.276	1
Scube1	0.030623283	-0.244422787	0.055	0.138	1
Ddx56	0.01486061	-0.244430809	0.064	0.179	1
Lonp1	0.031160035	-0.244463647	0.11	0.236	1
Nans	0.032899042	-0.244623566	0.165	0.309	1
Ift27	0.017650783	-0.244731001	0.064	0.171	1
Nr2c2ap	0.009133811	-0.244773394	0.028	0.122	1
Sik3	0.020559697	-0.244906405	0.055	0.154	1
Plpp5	0.01699953	-0.245131057	0.064	0.171	1
Mzt2	0.018843453	-0.24537759	0.064	0.171	1
Rusc2	0.01360449	-0.245514013	0.055	0.163	1
Pcolce	0.005285487	-0.245674818	0.798	0.935	1
Snrnp25	0.00902172	-0.245792537	0.028	0.122	1
Gsk3a	0.035330783	-0.245926064	0.092	0.195	1
Rnf146	0.013020791	-0.246346317	0.046	0.146	1
Topbp1	0.032438566	-0.246364198	0.073	0.171	1
Pias4	0.008801217	-0.246416028	0.028	0.122	1
Mrpl45	0.012478401	-0.246980129	0.046	0.146	1
Nomo1	0.016276154	-0.24838498	0.11	0.244	1
Cfp	0.037924627	-0.248617743	0.064	0.154	1
Tmco1	0.042872292	-0.248623874	0.165	0.309	1
Cox6a1	0.036092164	-0.24913018	0.789	0.878	1
Cisd2	0.018339913	-0.249347212	0.092	0.22	1
Inppl1	0.022144252	-0.249370943	0.083	0.195	1
Fip1l1	0.024020817	-0.249858772	0.092	0.203	1
Dnajc9	0.021924669	-0.250032158	0.037	0.122	1
Ddx24	0.048282657	-0.250324855	0.092	0.187	1
Tie1	0.009121157	-0.250798428	0.073	0.195	1
Riox2	0.007148325	-0.250918129	0.018	0.106	1
Sod1	0.049320729	-0.250977345	0.303	0.439	1
Kcnn4	0.009031546	-0.250977683	0.037	0.138	1
Slc9a8	0.008168312	-0.251092949	0.028	0.122	1
Serpinh1	0.039352371	-0.251483872	0.954	0.886	1
Cyp4f16	0.008469887	-0.252093726	0.055	0.171	1
Acot7	0.012883274	-0.252136379	0.046	0.146	1
Ncaph2	0.015455028	-0.252319929	0.147	0.301	1
Dnm3os	0.008673573	-0.253308356	0.11	0.26	1
Pwp1	0.005113221	-0.253696349	0.018	0.114	1
Carm1	0.024958018	-0.254052985	0.064	0.163	1
Fes	0.022147907	-0.254073515	0.092	0.211	1
Bcl3	0.008066882	-0.254933229	0.028	0.122	1
Blvra	0.014275327	-0.255158964	0.083	0.203	1
Tmem98	0.013159605	-0.255371467	0.046	0.146	1
Ptrhd1	0.009001804	-0.255403779	0.064	0.187	1
Igsf8	0.02941838	-0.255493648	0.092	0.195	1
Golga3	0.022982271	-0.255532936	0.064	0.163	1
S100a1	0.040349026	-0.256772757	0.128	0.244	1
Rbm14	0.021403385	-0.257567024	0.083	0.195	1
Traf4	0.007966581	-0.257733105	0.028	0.122	1
Ccna2	0.022864998	-0.257757639	0.092	0.203	1
Sympk	0.016839946	-0.258370465	0.064	0.171	1
Snapc2	0.002370987	-0.258576833	0.009	0.106	1
Adprh	0.026818486	-0.258905436	0.101	0.211	1
Glg1	0.01473162	-0.258951141	0.055	0.163	1
Olfml3	0.048151556	-0.259232335	0.789	0.805	1
Cdk2	0.013507339	-0.259445791	0.037	0.13	1
Cdk2ap2	0.02546246	-0.259702851	0.138	0.268	1
BC003331	0.007387887	-0.260136289	0.028	0.122	1
Fcf1	0.017650868	-0.260526937	0.064	0.171	1
Flrt2	0.011131249	-0.260566257	0.037	0.13	1
Iqcc	0.004704738	-0.260748061	0.018	0.114	1
Mesd	0.030296486	-0.261058932	0.119	0.236	1
Rexo4	0.011088601	-0.26145598	0.046	0.146	1
Cdk9	0.039674707	-0.261898178	0.147	0.26	1
Wwc2	0.008524747	-0.262102121	0.037	0.138	1
Cpne2	0.009456177	-0.262138469	0.037	0.138	1
Ifi27	0.036873236	-0.262860024	0.165	0.301	1
Rps2	0.002159735	-0.262970427	0.991	1	1
Tbc1d16	0.018282375	-0.263064145	0.046	0.138	1
Psmc4	0.02968121	-0.263089599	0.193	0.333	1
Tmem160	0.024399075	-0.263657699	0.128	0.26	1
Cdt1	0.004387157	-0.263757164	0.018	0.114	1
Myo18a	0.049317322	-0.264223372	0.073	0.163	1
Cdk5rap2	0.011864383	-0.264261536	0.028	0.114	1
Utp14a	0.005113221	-0.265542724	0.018	0.114	1
Gapdh	0.000967641	-0.265635106	0.936	0.967	1
Wnt9a	0.002190695	-0.265937586	0.009	0.106	1
Pigq	0.015683222	-0.267084177	0.073	0.187	1
Meis3	0.00902172	-0.267281585	0.028	0.122	1
Alx4	0.026085328	-0.267292129	0.046	0.13	1
Sdhaf1	0.020690912	-0.267365021	0.046	0.138	1
Cbr2	0.035064659	-0.267559475	0.138	0.26	1
Itga5	0.033475171	-0.267676628	0.138	0.268	1
Il4ra	0.03283191	-0.267758835	0.128	0.252	1
Timp1	0.028169232	-0.267901605	0.661	0.772	1
Fam98a	0.018928899	-0.268069513	0.055	0.154	1
Arl6ip4	0.013651113	-0.268086103	0.092	0.22	1
Ap1m1	0.013177488	-0.26824585	0.083	0.203	1
Chd8	0.018665895	-0.269410666	0.046	0.138	1
Slc25a28	0.004206065	-0.269610334	0.018	0.114	1
Smc4	0.017775979	-0.269671156	0.092	0.211	1
Csf1	0.009653784	-0.269759247	0.083	0.22	1
Mid1	0.002225715	-0.269856905	0.009	0.106	1
Tsg101	0.037086965	-0.269915622	0.138	0.268	1
Scamp2	0.009899903	-0.27040484	0.083	0.203	1
Golga4	0.006296082	-0.271039313	0.037	0.146	1
Flnc	0.00813778	-0.271057957	0.037	0.138	1
Lig1	0.00215618	-0.271198758	0.009	0.106	1
Asxl1	0.013334896	-0.271790088	0.055	0.163	1
Col22a1	0.04538735	-0.272053339	0.046	0.122	1
Clic1	0.046698627	-0.272183816	0.514	0.667	1
mt-Nd4l	0.026836054	-0.272206334	0.064	0.163	1
Auts2	0.012011227	-0.272249612	0.028	0.114	1
Cd74	0.040367172	-0.272444104	0.367	0.537	1
Plk1	0.012452132	-0.272638026	0.073	0.187	1
N4bp3	0.027560276	-0.273270545	0.037	0.114	1
1700021F05Rik	0.003206494	-0.2733608	0.028	0.138	1
Tubb6	0.034020184	-0.273437662	0.294	0.463	1
Ddhd2	0.007586776	-0.273613119	0.037	0.138	1
Zfp428	0.001959351	-0.273951409	0.009	0.106	1
Nup107	0.002225715	-0.274111222	0.009	0.106	1
Mical1	0.009762167	-0.274412722	0.083	0.211	1
Nfix	0.017986976	-0.274783424	0.165	0.317	1
Yif1b	0.028017394	-0.274944346	0.211	0.366	1
Rpl7l1	0.018039308	-0.274999654	0.138	0.276	1
Fbl	0.014943983	-0.275525126	0.119	0.26	1
Tcf19	0.004147225	-0.275704704	0.018	0.114	1
Erg28	0.030652249	-0.275832042	0.064	0.154	1
Map2k4	0.003511202	-0.27617044	0.028	0.138	1
Slc20a1	0.001928198	-0.276234961	0.009	0.106	1
Sec16b	0.007069457	-0.276292065	0.037	0.138	1
Ifitm3	0.038253571	-0.276581641	0.725	0.764	1
Etv5	0.007498266	-0.27708458	0.037	0.138	1
Emilin2	0.017486016	-0.277420422	0.064	0.171	1
Ccnb1	0.012418796	-0.277440564	0.11	0.26	1
Dpep1	0.007755275	-0.277518111	0.046	0.154	1
Gmnn	0.004691409	-0.277618659	0.028	0.13	1
U2af1	0.040226695	-0.277668837	0.229	0.382	1
Tlr2	0.012926598	-0.278199857	0.028	0.114	1
Cmc2	0.013582307	-0.278424334	0.064	0.171	1
Rangap1	0.016343766	-0.278445564	0.101	0.228	1
AI837181	0.019518025	-0.278467926	0.092	0.203	1
Bccip	0.027546303	-0.279203832	0.083	0.187	1
Slc19a1	0.014415423	-0.280647102	0.028	0.114	1
Dolk	0.002606406	-0.280801278	0.018	0.122	1
Pbxip1	0.007937445	-0.281600435	0.11	0.252	1
Cyba	0.047230619	-0.282121647	0.394	0.593	1
Gamt	0.004770698	-0.28270043	0.018	0.114	1
Eif5a	0.028602678	-0.283294385	0.743	0.886	1
Supt6	0.00823596	-0.283377443	0.064	0.187	1
Cpt1c	0.037511677	-0.284256728	0.073	0.163	1
Axin1	0.003654784	-0.284733584	0.037	0.154	1
Gsn	0.039250022	-0.285093359	0.257	0.39	1
Klhl26	0.004610439	-0.285554391	0.046	0.163	1
Lsm6	0.015750319	-0.28560823	0.174	0.35	1
Lrrc17	0.041563511	-0.285644677	0.183	0.317	1
Parp8	0.031349348	-0.286035486	0.073	0.171	1
Inpp5k	0.023301705	-0.286829274	0.064	0.163	1
Tmx4	0.003610812	-0.286874292	0.037	0.154	1
Nek6	0.014275327	-0.287253197	0.083	0.203	1
Mrpl58	0.015590949	-0.287691499	0.119	0.252	1
Ntmt1	0.007875338	-0.288003749	0.073	0.203	1
Thsd4	0.027488987	-0.288703124	0.064	0.154	1
Vps39	0.001362214	-0.288811661	0.009	0.114	1
Znhit6	0.001632958	-0.288829499	0.018	0.13	1
Kif22	0.006459099	-0.289150895	0.073	0.203	1
Tyms	0.011814311	-0.289394926	0.055	0.163	1
Cops4	0.01592664	-0.290592381	0.101	0.236	1
Ifi27l2a	0.005798898	-0.29078565	0.037	0.146	1
Vps18	0.005042989	-0.290796574	0.018	0.114	1
Prpf31	0.004631411	-0.293257128	0.028	0.13	1
Glipr2	0.013303399	-0.293875981	0.092	0.22	1
Ptdss2	0.004511782	-0.294051507	0.018	0.114	1
Rfc2	0.007606143	-0.294162165	0.11	0.26	1
Ints11	0.007966581	-0.295680653	0.028	0.122	1
Loxl3	0.006030598	-0.295990274	0.165	0.341	1
Tbcd	0.00385882	-0.296870534	0.055	0.187	1
Plod2	0.019662301	-0.296982185	0.101	0.22	1
Pdxk	0.004455434	-0.297636836	0.028	0.13	1
Mcm6	0.006794379	-0.297966131	0.073	0.211	1
Nudc	0.008925802	-0.298407032	0.128	0.293	1
Rasip1	0.007453853	-0.298493228	0.064	0.187	1
Dnpep	0.014923888	-0.298672566	0.128	0.268	1
Fbxw8	0.036071035	-0.298777866	0.119	0.236	1
Git2	0.00146682	-0.29996308	0.028	0.154	1
Plod3	0.041365344	-0.3004121	0.229	0.35	1
Vhl	0.000818711	-0.300636795	0.009	0.122	1
Tspan4	0.041693999	-0.301118555	0.431	0.577	1
Tmem97	0.003973945	-0.302167657	0.064	0.195	1
Errfi1	0.042542248	-0.302389969	0.202	0.333	1
Tbc1d20	0.003237801	-0.302433087	0.092	0.26	1
Zzef1	0.001806194	-0.302613683	0.018	0.13	1
Gm14005	0.00597169	-0.304650075	0.073	0.203	1
Nckap1l	0.003334004	-0.304962691	0.028	0.138	1
Gmppb	0.008711294	-0.305002261	0.092	0.228	1
Slc35e1	0.00385882	-0.30598709	0.055	0.187	1
Gpx3	0.015126885	-0.306544553	0.596	0.74	1
Chd2	0.005465744	-0.306825834	0.037	0.146	1
Nfic	0.027478907	-0.307000772	0.284	0.48	1
Focad	0.000498543	-0.307700524	0	0.106	1
Snrnp70	0.016020864	-0.307931026	0.128	0.26	1
Nelfe	0.004663233	-0.308550451	0.046	0.163	1
Haus4	0.00145377	-0.310003862	0.018	0.13	1
Bckdk	0.008350684	-0.310217181	0.11	0.26	1
Rnf187	0.01302904	-0.310393441	0.229	0.382	1
Col6a3	0.018552517	-0.310443173	0.853	0.927	1
Rcn3	0.011356081	-0.31158486	0.688	0.829	1
Chd3	0.010215799	-0.312210818	0.092	0.228	1
Idnk	0.002426194	-0.312825882	0.018	0.122	1
Alg5	0.006637245	-0.312845892	0.064	0.187	1
Cox4i1	0.000727079	-0.314267154	0.927	0.976	1
Slc39a7	0.045217733	-0.315111676	0.349	0.496	1
Aimp2	0.005045197	-0.315467051	0.055	0.179	1
Ptges	0.006807624	-0.317005364	0.064	0.187	1
Ccl2	0.007481638	-0.317229469	0.028	0.122	1
Megf8	0.010546118	-0.318037682	0.083	0.211	1
Ift57	0.001755049	-0.319434079	0.018	0.13	1
Nuf2	0.000502854	-0.319448275	0.009	0.13	1
Pcmt1	0.007398814	-0.319493422	0.073	0.203	1
Pcna	0.0039	-0.319692199	0.092	0.252	1
Aldh18a1	0.00932565	-0.320458756	0.083	0.211	1
Prrx2	0.03751869	-0.320760282	0.514	0.65	1
Mrto4	0.007196234	-0.320996723	0.064	0.187	1
Nfam1	0.001760413	-0.321197024	0.037	0.163	1
Eri3	0.021735479	-0.321230646	0.229	0.398	1
Pkd1	0.030098348	-0.321471102	0.202	0.341	1
Gatb	0.000498553	-0.323889092	0	0.106	1
Gramd1a	0.005258589	-0.324021047	0.083	0.228	1
Ube2m	0.006726904	-0.324734051	0.174	0.358	1
Kif23	0.000780058	-0.325032482	0.009	0.122	1
Acd	0.000673442	-0.325091027	0.018	0.146	1
Eif3b	0.04269051	-0.326480839	0.303	0.447	1
Cenps	0.000293363	-0.327466363	0	0.114	1
Psme2	0.045665351	-0.327522556	0.229	0.374	1
Scamp3	0.008085846	-0.328036493	0.147	0.293	1
Maged1	0.025733652	-0.328904166	0.624	0.724	1
Tmem132a	0.007824911	-0.329178242	0.083	0.22	1
Mrps16	0.021118619	-0.329237683	0.248	0.447	1
Srrm2	0.005570575	-0.329238454	0.138	0.309	1
Tmem26	0.003336923	-0.330070339	0.037	0.154	1
Sec61a1	0.023236637	-0.330154742	0.523	0.715	1
Lgals1	0.00072311	-0.330560306	0.817	0.919	1
Anapc15	0.002798778	-0.330676366	0.018	0.122	1
Tacc3	0.002558066	-0.332544169	0.046	0.179	1
Per1	0.000867407	-0.33270488	0.018	0.138	1
Mosmo	0.001283107	-0.332858616	0.028	0.154	1
Get4	0.013769486	-0.333044324	0.147	0.293	1
Atp5g1	0.021905667	-0.333269605	0.459	0.634	1
Psmb9	0.000857255	-0.333392172	0.028	0.163	1
Miip	0.000990391	-0.333980154	0.018	0.138	1
Rps6ka4	0.006593196	-0.335144886	0.165	0.333	1
Plbd2	0.001965675	-0.335707134	0.11	0.293	1
Rrbp1	0.001361299	-0.336897077	0.569	0.74	1
Rpsa	8.02E-11	-0.337443893	1	1	1.26E-06
Cyp26b1	0.004994998	-0.340352923	0.092	0.236	1
Dnmt1	0.006136306	-0.340622647	0.083	0.22	1
Rpa2	0.001335994	-0.340875195	0.037	0.171	1
Rac3	0.001621539	-0.341087365	0.055	0.203	1
Fus	0.006181486	-0.341363722	0.193	0.398	1
Rab1b	0.027074228	-0.341530934	0.22	0.358	1
Rbmxl1	0.002204648	-0.341887333	0.037	0.163	1
Capns1	0.031900604	-0.342453533	0.55	0.699	1
Vamp5	0.005163581	-0.343463219	0.046	0.163	1
Agpat2	0.002993773	-0.344006479	0.083	0.236	1
Nme6	0.000498543	-0.344400249	0	0.106	1
Arhgef25	0.00898451	-0.344890136	0.119	0.26	1
Polr2e	0.011095344	-0.345286104	0.202	0.358	1
Vps16	0.000644287	-0.345452435	0.018	0.146	1
Cherp	0.001952657	-0.346361893	0.046	0.179	1
Rnaseh2a	0.000533136	-0.349745673	0.028	0.171	1
Rrp7a	0.000173429	-0.354976985	0.009	0.146	1
Fstl3	0.008256957	-0.355450313	0.101	0.236	1
Micu2	0.008271109	-0.35661946	0.083	0.211	1
P4hb	0.000260085	-0.357925675	0.752	0.862	1
Selenoh	0.023618413	-0.358567399	0.211	0.358	1
Lrwd1	0.000312813	-0.35907368	0.028	0.171	1
Hnrnpdl	0.01762011	-0.3601837	0.211	0.358	1
Esam	0.012122099	-0.362355821	0.165	0.317	1
Zc3h7a	0.002020275	-0.3625107	0.073	0.228	1
Ddx49	0.000339404	-0.362748211	0.028	0.179	1
Rrm1	0.002625264	-0.364954121	0.138	0.325	1
Ranbp1	0.008462676	-0.365599351	0.339	0.537	1
Rrp1	0.026955331	-0.366000842	0.138	0.268	1
Tspan17	0.001185551	-0.36613317	0.046	0.187	1
Arhgef15	0.000173429	-0.366213133	0.009	0.146	1
Rnaseh2c	0.002176478	-0.36791192	0.138	0.325	1
Lsm4	0.005376683	-0.368092874	0.211	0.407	1
Slc25a10	0.000848688	-0.368213679	0.064	0.228	1
Med29	0.001371258	-0.368887949	0.064	0.22	1
Mmp14	0.026798512	-0.368927616	0.248	0.407	1
Mvb12a	0.013384795	-0.370566055	0.101	0.228	1
Ccnl2	0.00754255	-0.371016828	0.174	0.325	1
Ptms	0.002739036	-0.371327483	0.523	0.748	1
Man1b1	0.001101927	-0.373541065	0.046	0.187	1
Zfp787	0.001070908	-0.374555525	0.055	0.211	1
Preb	0.001348697	-0.374891649	0.064	0.22	1
Il3ra	0.000130803	-0.376703363	0.009	0.146	1
Ddx39	0.004980605	-0.377877936	0.119	0.276	1
Lsm2	0.002066788	-0.380659673	0.11	0.285	1
Coq8a	0.002491688	-0.383383364	0.064	0.203	1
Ifitm1	0.013993387	-0.383624402	0.193	0.333	1
Ddx5	0.002310393	-0.385045202	0.661	0.772	1
H2-Q7	0.00019798	-0.385368152	0.028	0.179	1
Npepl1	0.008363483	-0.38611824	0.064	0.179	1
Stmn1	0.000947956	-0.389779563	0.055	0.211	1
Alyref	0.003664	-0.391200952	0.193	0.398	1
Xist	0.001572769	-0.391872184	0.083	0.244	1
H2-Ab1	0.023176978	-0.393427849	0.349	0.512	1
Mcm7	0.00021743	-0.396923937	0.037	0.195	1
Tmem214	0.001030121	-0.397857262	0.11	0.301	1
Mcm5	0.000466325	-0.400273076	0.064	0.236	1
Ptp4a3	0.003650362	-0.400641335	0.11	0.26	1
Tubb5	9.77E-06	-0.402757966	0.908	0.886	0.153653385
Pgls	0.009632504	-0.40316236	0.33	0.52	1
Numa1	0.000669505	-0.403297602	0.073	0.244	1
Evl	0.001056267	-0.403431819	0.073	0.236	1
Tpm3	0.004054507	-0.404598777	0.211	0.398	1
H2afj	0.013497296	-0.406106248	0.33	0.504	1
Aprt	0.003641296	-0.413132355	0.303	0.537	1
Mmp3	0.000113869	-0.416072438	0.101	0.317	1
Pth1r	0.001747701	-0.416242447	0.404	0.634	1
Dctpp1	0.001060672	-0.416766072	0.064	0.22	1
Lmna	6.43E-05	-0.417963629	0.807	0.951	1
Nisch	0.003232048	-0.422405292	0.404	0.593	1
Rnf19b	0.000583356	-0.42712511	0.073	0.252	1
Mlf2	0.006175747	-0.431811198	0.321	0.496	1
Bst2	7.66E-05	-0.432374777	0.018	0.179	1
Mif	0.000388892	-0.435822697	0.55	0.748	1
Cdk1	0.000303524	-0.436408669	0.11	0.325	1
Chst2	0.000448882	-0.443614401	0.046	0.203	1
Ckap4	0.001015312	-0.444609012	0.367	0.602	1
Psmd13	0.000544662	-0.445284043	0.147	0.374	1
Tubb4b	0.000500576	-0.449945207	0.349	0.593	1
Mbd3	0.002416318	-0.455461149	0.193	0.374	1
Sh3glb2	5.19E-05	-0.456162882	0.037	0.22	0.816089439
Cuedc2	6.47E-05	-0.461225674	0.101	0.333	1
Eif4a1	3.12E-06	-0.471705878	0.661	0.878	0.049096002
Cdk5rap3	3.55E-05	-0.477424426	0.11	0.358	0.558706705
Fmnl3	0.000131714	-0.478463005	0.11	0.341	1
Birc5	3.48E-05	-0.478883854	0.11	0.374	0.54657876
Idh2	0.000728592	-0.481497624	0.193	0.423	1
Pkm	5.51E-07	-0.486248842	0.881	0.976	0.008668695
Eno1	0.00060794	-0.487393327	0.248	0.48	1
Arfgap1	0.000149927	-0.489812954	0.073	0.268	1
Arhgdia	0.001161517	-0.494176674	0.514	0.74	1
Spc24	5.39E-06	-0.502383295	0.055	0.301	0.084802332
Atp5d	0.000181332	-0.505588704	0.468	0.74	1
Lgals3bp	0.002148406	-0.508235525	0.138	0.317	1
Gpihbp1	1.56E-05	-0.517756226	0.028	0.22	0.245678341
Ccdc124	8.14E-05	-0.525468025	0.119	0.35	1
C4b	0.022383418	-0.534592346	0.11	0.22	1
H2-Eb1	0.000404285	-0.549044529	0.092	0.276	1
Impdh2	2.32E-05	-0.554661424	0.174	0.455	0.365031158
Tuba1b	2.05E-05	-0.560120129	0.661	0.829	0.322776316
Ube2s	4.72E-05	-0.573129608	0.294	0.561	0.741908246
Lars2	0.011034008	-0.573456172	0.174	0.317	1
H2-K1	4.41E-05	-0.60384554	0.505	0.764	0.692785457
Prcp	3.34E-07	-0.606168255	0.009	0.236	0.005258023
Hba-a1	0.029752804	-0.718316902	0.128	0.244	1
Gm42418	5.09E-05	-0.962278714	0.367	0.61	0.8004142
Prg4	1.57E-09	-1.517988806	0.193	0.553	2.47E-05
