# Supplementary material for: Spatial transcriptomics reveals metabolic changes underly age-dependent declines in digit regeneration
Source: eLife. 2022 May 26;11:e71542. doi: 10.7554/eLife.71542 (PMC9135401; doi:10.7554/eLife.71542)
Supplement: Supplementary file 6. [file elife-71542-supp6.csv]

Table S6 Spatial DEGs differentially expressed between control and OAA-treated mice
Gene	P-value	Log FC	Treatment	Region
Krtap8-1	3.35E-08	1.688044299	Cont	Fibro
Krtap6-1	4.94E-07	1.600311476	Cont	Fibro
Krtap9-1	0.001437087	1.556095075	Cont	Bone
Gm10229	1.67E-07	1.515841714	Cont	Fibro
1110025L11Rik	1.00E-06	1.486657467	Cont	Fibro
Krtap13-1	7.93E-07	1.482317436	Cont	Bone
Krt33a	4.95E-06	1.44080548	Cont	Bone
2310061N02Rik	9.84E-06	1.409262353	Cont	Bone
Thbs2	1.71E-07	1.382588149	Cont	Bone
Krtap1-5	1.37E-10	1.373770056	Cont	Fibro
Krtap4-7	3.84E-07	1.347096246	Cont	Bone
Krtap6-5	1.67E-09	1.343503991	Cont	Fibro
Krtap3-1	1.59E-10	1.335973892	Cont	Fibro
Krtap1-3	1.11E-07	1.315528746	Cont	Bone
Krtap16-3	4.24E-09	1.309068884	Cont	Fibro
Krtap9-3	3.51E-08	1.2782995	Cont	Bone
Sfrp2	7.64E-17	1.24911695	Cont	Fibro
Krtap9-3	4.00E-11	1.227946293	Cont	Fibro
Krtap3-3	1.16E-08	1.222423011	Cont	Bone
Krtap11-1	1.66E-05	1.220606357	Cont	Bone
Krtap7-1	5.50E-07	1.215160862	Cont	Fibro
Gm11562	4.89E-11	1.20653719	Cont	Fibro
Krtap3-2	1.83E-06	1.198089532	Cont	Bone
Gm10228	2.10E-06	1.184334629	Cont	Fibro
Krtap3-1	1.68E-05	1.183372556	Cont	Bone
Krtap7-1	0.00108286	1.173726474	Cont	Bone
Krtap22-2	1.19E-07	1.142238333	Cont	Fibro
Col12a1	4.92E-05	1.137152852	Cont	Bone
Krtap3-3	1.14E-08	1.132643994	Cont	Fibro
Krt83	2.14E-05	1.122476643	Cont	Bone
Igfbp2	3.83E-10	1.118565809	Cont	Bone
Krtap6-2	8.22E-06	1.100515475	Cont	Fibro
Krt86	2.06E-06	1.088090352	Cont	Bone
Krtap4-16	0.000664588	1.084703548	Cont	Bone
Slc7a11	0.000872557	1.084438373	Cont	Bone
Igfbp4	9.61E-19	1.081667958	Cont	Fibro
Gm11559	3.37E-05	1.059875255	Cont	Bone
Krtap3-2	2.16E-07	1.059478273	Cont	Fibro
Krtap1-5	0.000103447	1.053815226	Cont	Bone
2310061N02Rik	2.26E-12	1.053786689	Cont	Fibro
Gm11938	4.42E-08	1.049855983	Cont	Fibro
Gm11562	6.29E-05	1.048246108	Cont	Bone
Krt34	2.35E-07	1.043599718	Cont	Fibro
Krtap2-4	4.42E-07	1.042232731	Cont	Fibro
Mmp13	0.004654842	1.036026935	Cont	Bone
Col8a2	2.46E-17	1.034304636	Cont	Fibro
Psors1c2	0.002229831	1.019114377	Cont	Bone
Krtap8-1	0.008776589	1.014555936	Cont	Bone
Gm11938	7.54E-06	1.002129985	Cont	Bone
Krt81	6.06E-05	0.999350175	Cont	Bone
Lrrc15	1.74E-05	0.996505709	Cont	Bone
Krtap4-1	3.74E-05	0.995546012	Cont	Bone
Gpx3	6.30E-09	0.993805809	Cont	Fibro
Gm11567	0.00337315	0.986344357	Cont	Bone
Ltbp2	1.44E-11	0.974297576	Cont	Fibro
Krtap1-3	1.92E-08	0.972206084	Cont	Fibro
Krtap11-1	2.26E-06	0.971763326	Cont	Fibro
Krt87	1.14E-07	0.965760377	Cont	Fibro
Eln	3.72E-14	0.960445561	Cont	Fibro
Krtap17-1	0.00807533	0.932954208	Cont	Bone
Krtap13-1	5.09E-12	0.925584711	Cont	Fibro
Mfap4	3.73E-18	0.916922797	Cont	Fibro
Col5a2	5.82E-06	0.912805456	Cont	Bone
Krtap2-4	0.002847704	0.901814503	Cont	Bone
Krt33b	3.25E-08	0.898587803	Cont	Fibro
Cpxm1	0.000142415	0.896710477	Cont	Bone
Ap1s2	0.008897773	0.886572718	Cont	Bone
Igfbp3	0.000305924	0.876436886	Cont	Bone
Krtap4-1	0.0004771	0.875410577	Cont	Fibro
Krt86	2.66E-07	0.860011326	Cont	Fibro
Krtap4-2	0.000593472	0.841857969	Cont	Bone
Lum	7.97E-06	0.841475695	Cont	Bone
Krt34	0.001518624	0.837433764	Cont	Bone
Krt33b	1.15E-05	0.826109485	Cont	Bone
Dusp14	5.83E-06	0.819108662	Cont	Bone
Gm11563	0.00973692	0.819036697	Cont	Bone
Col11a1	0.00235963	0.810841873	Cont	Bone
Aebp1	7.79E-09	0.807603869	Cont	Fibro
Ndufab1	0.004806851	0.793377953	Cont	Bone
Gm10228	0.000548255	0.787643284	Cont	Bone
Mmp9	0.011596291	0.783803143	Cont	Bone
Col6a1	0.000526766	0.781810457	Cont	Bone
Tnfrsf19	1.76E-07	0.781026762	Cont	Bone
Gas6	5.62E-09	0.781018207	Cont	Fibro
Cpxm1	4.66E-10	0.768968644	Cont	Fibro
Chac1	0.001676127	0.766262128	Cont	Bone
Mdk	0.002357881	0.761459216	Cont	Bone
Gm11568	0.004254395	0.760241894	Cont	Bone
Bglap2	0.001023078	0.759848684	Cont	Bone
Col8a2	0.03329682	0.752856871	Cont	Bone
Col7a1	0.000225333	0.736602796	Cont	Bone
Krt31	0.00017743	0.735044946	Cont	Bone
Nid1	0.00188874	0.732545372	Cont	Bone
Krtap6-3	7.96E-05	0.732383432	Cont	Fibro
Rpl26	2.62E-09	0.731832939	Cont	Bone
Ecrg4	0.0009096	0.724508016	Cont	Bone
Sfrp2	3.19E-05	0.71635429	Cont	Bone
Dapl1	0.000309626	0.710894094	Cont	Bone
Col3a1	0.00099547	0.709707049	Cont	Bone
Prr9	6.73E-07	0.708470125	Cont	Fibro
Krt42	5.28E-11	0.695690867	Cont	Fibro
Mmp23	1.02E-09	0.689434657	Cont	Fibro
Krt84	0.000212339	0.687908802	Cont	Fibro
Msx2	0.008230305	0.68707734	Cont	Bone
Pdgfrl	0.000535755	0.685625369	Cont	Bone
Fbln2	0.002185256	0.681189825	Cont	Bone
Cgref1	0.035808696	0.680785833	Cont	Bone
Igfbp3	6.28E-07	0.68037513	Cont	Fibro
Dlx3	0.000698427	0.677587684	Cont	Bone
Krtap4-6	0.00035938	0.672203768	Cont	Bone
Decr1	0.112888731	0.671000367	Cont	Bone
Gpnmb	1.50E-06	0.670418907	Cont	Bone
Sfrp1	0.000493212	0.668525271	Cont	Bone
Krt81	0.00286672	0.663414241	Cont	Fibro
Bglap3	0.013842215	0.660339533	Cont	Bone
S100a3	0.019276328	0.655982947	Cont	Bone
Col5a1	0.000387453	0.651272612	Cont	Bone
Grk6	0.47591006	0.651187964	Cont	Bone
Krtap6-2	0.034050019	0.649627275	Cont	Bone
Rab24	0.106341138	0.649087575	Cont	Bone
Miat	0.001322395	0.64860475	Cont	Bone
Ube2g1	0.009694146	0.648325324	Cont	Bone
Krt83	2.88E-05	0.644688274	Cont	Fibro
Ndufa4l2	9.52E-06	0.644399233	Cont	Bone
Ctsk	0.006042902	0.643140291	Cont	Bone
Aebp1	0.011002574	0.642506626	Cont	Bone
Krtap19-9b	5.96E-05	0.639447313	Cont	Fibro
Pdlim5	0.014293276	0.637596424	Cont	Bone
Ccn1	0.015400592	0.635663029	Cont	Bone
Ep400	0.110832546	0.632183287	Cont	Bone
Col7a1	2.26E-07	0.628910951	Cont	Fibro
Lsp1	7.49E-14	0.628407791	Cont	Fibro
Prr9	2.81E-05	0.626251483	Cont	Bone
Mpz	0.000651589	0.624522862	Cont	Fibro
Col12a1	2.70E-07	0.621876428	Cont	Fibro
Pmp22	1.49E-05	0.615831124	Cont	Fibro
Lrrc15	1.60E-07	0.614648103	Cont	Fibro
Pdgfrb	0.057127666	0.61392454	Cont	Bone
Krt33a	3.85E-07	0.612418603	Cont	Fibro
Itm2a	0.025463251	0.607304191	Cont	Bone
Csdc2	0.000313639	0.605391632	Cont	Bone
Cd302	0.04703076	0.604146141	Cont	Bone
Krt90	3.95E-07	0.603221405	Cont	Fibro
Col6a2	0.004039989	0.596097156	Cont	Bone
Ibsp	0.33372027	0.5916144	Cont	Bone
Scp2	0.001351111	0.58808189	Cont	Bone
Psmb6	0.065764066	0.583617732	Cont	Bone
Krt87	0.001383943	0.583007852	Cont	Bone
Fbln1	2.48E-08	0.582238343	Cont	Fibro
Cadm1	0.23831991	0.581259496	Cont	Bone
Man2b1	0.024165921	0.580479516	Cont	Bone
Tyrobp	0.052611503	0.579163351	Cont	Bone
Chmp2b	0.038381705	0.576726658	Cont	Bone
Fgfr2	0.02141414	0.575984061	Cont	Bone
Wdr45b	0.001768794	0.574926492	Cont	Bone
Mfsd12	0.067842502	0.574676332	Cont	Bone
Lum	1.03E-06	0.572001615	Cont	Fibro
Postn	0.001230244	0.571583798	Cont	Bone
Itgb5	0.00036561	0.569654263	Cont	Bone
Gas6	6.88E-05	0.565026097	Cont	Bone
Cpq	0.050958353	0.564971457	Cont	Bone
Pea15a	0.034163766	0.563364481	Cont	Bone
Mfap2	0.001471492	0.561003347	Cont	Bone
Park7	5.48E-05	0.559522651	Cont	Bone
Sptan1	0.017166659	0.55883089	Cont	Bone
Fbn1	2.46E-08	0.555815875	Cont	Fibro
Twist1	0.00833914	0.554961456	Cont	Bone
Spink12	7.27E-06	0.554890376	Cont	Fibro
Col4a2	1.51E-07	0.550859957	Cont	Fibro
Adamts2	0.338677618	0.548754889	Cont	Bone
Htra1	0.001550052	0.547952379	Cont	Bone
Mmp23	0.034107903	0.547140834	Cont	Bone
Ndfip1	8.25E-05	0.544978323	Cont	Bone
Fxr2	0.150945167	0.54236842	Cont	Bone
Smoc2	0.004099484	0.541143407	Cont	Bone
Wfdc18	0.000295375	0.539516963	Cont	Fibro
Mmp13	0.000896885	0.535471228	Cont	Fibro
Col8a1	0.001324525	0.535431938	Cont	Bone
Cdc42ep3	0.000214103	0.534755288	Cont	Bone
Ccdc43	0.018088431	0.534199851	Cont	Bone
Gm11563	4.33E-07	0.530056633	Cont	Fibro
Thbs1	0.090619997	0.529126037	Cont	Bone
Tnn	0.169588576	0.528894732	Cont	Bone
Gprc5d	0.005414957	0.528591156	Cont	Bone
Svep1	0.031151811	0.528448446	Cont	Bone
Nedd4	0.010128202	0.527662761	Cont	Bone
Btg1	0.00361115	0.526650061	Cont	Bone
Wnt5a	7.90E-11	0.526420638	Cont	Fibro
Krtap6-5	0.066958703	0.52638129	Cont	Bone
Mest	0.000130515	0.525648317	Cont	Bone
Gpm6a	0.01585045	0.524453065	Cont	Bone
Fbln5	7.63E-10	0.522706211	Cont	Fibro
Psors1c2	2.29E-07	0.522030634	Cont	Fibro
Fndc1	0.077529689	0.519674379	Cont	Bone
Col4a1	0.197181413	0.518445068	Cont	Bone
Svep1	2.04E-07	0.517983801	Cont	Fibro
Ddx50	0.269205793	0.517372611	Cont	Bone
Ptk7	0.141515211	0.516658065	Cont	Bone
AI837181	0.012587495	0.515665309	Cont	Bone
Vsig8	0.08640804	0.514934358	Cont	Bone
Fndc1	4.63E-07	0.514632591	Cont	Fibro
Dipk2a	0.242650677	0.514436086	Cont	Bone
Me1	0.000737348	0.512174465	Cont	Bone
Tent5a	0.74818675	0.510808199	Cont	Bone
Bmp4	8.35E-05	0.510563856	Cont	Bone
Dpt	0.027024479	0.5081091	Cont	Bone
Eif4b	0.033882046	0.504379326	Cont	Bone
Timp2	0.00449077	0.503343645	Cont	Bone
Nkd2	0.007931809	0.501359883	Cont	Bone
Cybrd1	0.040882527	0.500839228	Cont	Bone
Slc48a1	0.008860967	0.500459847	Cont	Bone
Oip5os1	0.292415907	0.500251089	Cont	Bone
Maco1	0.108965782	0.499039139	Cont	Bone
Thbs3	0.021900883	0.497887099	Cont	Bone
Ccn4	0.012739684	0.497763087	Cont	Bone
Gpat4	0.004457792	0.497354391	Cont	Bone
Clk3	0.020602576	0.49725644	Cont	Bone
Snx2	0.14962062	0.496425258	Cont	Bone
Cyb5a	0.161066471	0.496306402	Cont	Bone
Lamb1	0.072409877	0.494474416	Cont	Bone
Col16a1	5.21E-06	0.493951679	Cont	Fibro
Hagh	0.017263792	0.493854924	Cont	Bone
Ankrd22	0.004686726	0.492499727	Cont	Bone
Ckb	0.002436468	0.492447576	Cont	Bone
Gm14137	0.041336141	0.491686821	Cont	Bone
Ctsa	0.001825931	0.491238133	Cont	Bone
Cul3	0.000479356	0.491197345	Cont	Bone
Cnn2	2.98E-07	0.489102681	Cont	Fibro
Cpe	0.056279474	0.487561184	Cont	Bone
Ndufb4	0.006979055	0.486775924	Cont	Bone
Cald1	0.100300806	0.482963486	Cont	Bone
Acox1	0.19527235	0.482650234	Cont	Bone
Cd248	4.43E-09	0.482457367	Cont	Fibro
Tmsb10	0.001596712	0.482334814	Cont	Bone
Ybx1	0.05524311	0.482267989	Cont	Bone
Ogn	0.001959084	0.4805012	Cont	Bone
Col16a1	0.013167427	0.48040568	Cont	Bone
Bc1	0.005252483	0.478949088	Cont	Fibro
Cxcl14	1.86E-11	0.478931024	Cont	Fibro
Aldh9a1	0.08633573	0.47736482	Cont	Bone
Rtl8a	0.010205772	0.474037759	Cont	Bone
S100a8	0.029041771	0.473558648	Cont	Bone
Krt35	0.391679231	0.471237389	Cont	Bone
Klc1	0.432025485	0.469496304	Cont	Bone
Pdlim4	0.000146044	0.469094006	Cont	Bone
Vwf	0.641583894	0.468973866	Cont	Bone
C1ra	0.09753586	0.467560427	Cont	Bone
Emilin1	0.206905294	0.466060593	Cont	Bone
Fstl1	1.98E-06	0.464980879	Cont	Fibro
Ufsp2	0.01624508	0.464394233	Cont	Bone
Zcchc24	4.16E-09	0.463850364	Cont	Fibro
Cdc42bpa	0.784462065	0.463465009	Cont	Bone
Ahr	0.011825216	0.462926242	Cont	Bone
Rtn4rl1	0.001772532	0.462803081	Cont	Bone
Col4a1	7.03E-05	0.462488688	Cont	Fibro
Krtap4-6	4.51E-05	0.461558368	Cont	Fibro
Ppic	0.061409841	0.461340809	Cont	Bone
Eln	0.064093665	0.460126669	Cont	Bone
Cxcl12	0.00038281	0.458835915	Cont	Fibro
Krtap6-1	0.113589136	0.455213452	Cont	Bone
Scn1b	0.051873817	0.451098619	Cont	Bone
Sparc	0.00041476	0.450698853	Cont	Bone
C1ra	2.59E-06	0.45057088	Cont	Fibro
Cisd1	0.14962062	0.450400396	Cont	Bone
Mios	0.008547092	0.4503086	Cont	Bone
Mir205hg	0.042818036	0.449509478	Cont	Bone
Ndrg1	0.007209696	0.448298974	Cont	Bone
Hexb	0.021166942	0.447243916	Cont	Bone
Elp1	0.00414037	0.447223582	Cont	Bone
Ascc2	0.121867615	0.445901096	Cont	Bone
Atp6v1c1	0.041055837	0.445820522	Cont	Bone
Ogt	0.326081944	0.444752186	Cont	Bone
Hectd1	0.011581444	0.444172461	Cont	Bone
Eaf1	0.000400506	0.443721807	Cont	Bone
Hephl1	0.001573286	0.440663995	Cont	Bone
Bnip3	0.000124855	0.439504773	Cont	Bone
Supt20	0.023274239	0.438821803	Cont	Bone
Rfc1	0.044735777	0.438511465	Cont	Bone
Gm5444	0.004164195	0.43807587	Cont	Bone
Tmem11	0.125367502	0.437404732	Cont	Bone
Slc39a7	1.10E-08	0.436533987	Cont	Fibro
Copz2	0.396398723	0.436377926	Cont	Bone
Mff	0.045183138	0.435459732	Cont	Bone
Srpx2	0.108118017	0.435298362	Cont	Bone
Eif3i	0.000303288	0.434397767	Cont	Bone
Stxbp2	0.75176488	0.433699915	Cont	Bone
Pex6	0.676212413	0.433190848	Cont	Bone
Txndc17	0.000507679	0.432761841	Cont	Bone
Tubb6	0.010743959	0.432300362	Cont	Bone
Lpin3	0.011584152	0.431169101	Cont	Bone
Ell2	0.030796182	0.430530542	Cont	Bone
Sec24c	0.145942451	0.429692967	Cont	Bone
Gsta3	0.01107252	0.428828075	Cont	Bone
Copg1	4.60E-12	0.428229148	Cont	Fibro
Xiap	0.00786643	0.427449013	Cont	Bone
Uggt1	0.159734474	0.426170314	Cont	Bone
Pak1	0.215174178	0.425109857	Cont	Bone
Sys1	0.001579571	0.42507458	Cont	Bone
Emc2	0.003880707	0.423327172	Cont	Bone
Nid2	0.003496132	0.422703898	Cont	Bone
Selenop	0.053003112	0.422480768	Cont	Bone
Ypel3	0.011619975	0.422408812	Cont	Bone
Zfp185	0.332290419	0.422206882	Cont	Bone
Lix1l	0.020838889	0.419755345	Cont	Bone
Srpx	0.002820968	0.419184283	Cont	Bone
Anxa5	0.000651835	0.419086548	Cont	Bone
Itpkb	0.118174446	0.417199092	Cont	Bone
Cuedc1	0.02263849	0.416211673	Cont	Bone
Zcchc14	0.084669704	0.414775857	Cont	Bone
Vta1	0.01537021	0.414640973	Cont	Bone
Pgk1	0.000134211	0.414518096	Cont	Bone
Slmap	0.245326927	0.414426052	Cont	Bone
Nfix	0.007606502	0.413769104	Cont	Bone
Crabp1	0.011982955	0.413607788	Cont	Bone
Ube2b	0.068018676	0.413584248	Cont	Bone
Bcam	0.000106703	0.413252477	Cont	Fibro
Dpep1	0.007670646	0.413156909	Cont	Bone
Loxl3	0.082465259	0.413031214	Cont	Bone
Chmp1b	0.040798138	0.412808331	Cont	Bone
Smarcd3	0.016277498	0.412163998	Cont	Bone
Tnc	0.164312566	0.411483945	Cont	Bone
1600014C10Rik	0.023681611	0.411266403	Cont	Fibro
Fyn	0.04267455	0.410508756	Cont	Bone
Mical3	0.202515652	0.410005425	Cont	Bone
Gm10229	0.615167511	0.409257534	Cont	Bone
Prkcd	0.101976578	0.408508485	Cont	Bone
Col6a2	0.000276563	0.408026604	Cont	Fibro
Dmpk	0.097043303	0.408003833	Cont	Bone
Ryk	0.02225504	0.407090645	Cont	Bone
Flot1	0.475272763	0.406499108	Cont	Bone
Zfp521	0.03132305	0.406284254	Cont	Bone
Npm3	0.15905124	0.404972823	Cont	Bone
Thbs1	1.33E-05	0.404705814	Cont	Fibro
Irf2	0.004164195	0.404618909	Cont	Bone
Rai14	0.00509886	0.404609041	Cont	Bone
Gm11569	0.002053985	0.403676234	Cont	Bone
Arpp19	0.001435182	0.403363721	Cont	Bone
Itga11	0.005988565	0.402947991	Cont	Bone
Selenom	3.10E-05	0.401550206	Cont	Fibro
Smpdl3a	0.011223312	0.400170743	Cont	Bone
Notch3	4.51E-07	0.399214011	Cont	Fibro
Mdk	6.03E-06	0.399128984	Cont	Fibro
Metap2	0.039146146	0.399049705	Cont	Bone
Rab31	0.064475209	0.398113346	Cont	Bone
Selenbp1	0.119238411	0.398012405	Cont	Bone
Vps4a	0.257076455	0.396695316	Cont	Bone
Rhoc	0.180816707	0.393832206	Cont	Bone
Plcd1	0.05808688	0.3936262	Cont	Bone
H2afv	0.554367883	0.392876704	Cont	Bone
Galnt1	0.102808438	0.392679852	Cont	Bone
Col1a1	0.001839894	0.392203673	Cont	Bone
Fn1	0.023285408	0.392129814	Cont	Bone
Vim	0.011507991	0.391525467	Cont	Bone
Sfrp1	6.58E-06	0.391386231	Cont	Fibro
Fcer1g	0.010251809	0.39134967	Cont	Bone
Tmem234	0.212696118	0.391316988	Cont	Bone
Fbln5	0.007324477	0.388986638	Cont	Bone
Krtap4-9	0.0064508	0.388656037	Cont	Bone
Slc40a1	0.037441194	0.388612258	Cont	Bone
Ccar2	0.008695459	0.38854157	Cont	Bone
Uap1l1	2.38E-07	0.388269979	Cont	Fibro
Rock2	0.016794112	0.388206466	Cont	Bone
Mid1ip1	0.282040291	0.387498168	Cont	Bone
Dync1h1	0.250472528	0.387255416	Cont	Bone
Sec13	0.016624612	0.386872444	Cont	Bone
Nck2	0.004119416	0.386645957	Cont	Bone
Gpm6b	0.000287948	0.386579672	Cont	Bone
Cpe	0.000894973	0.386386918	Cont	Fibro
Nfe2l1	0.829657022	0.385283336	Cont	Bone
Tgfbr2	0.025296003	0.384297365	Cont	Bone
Rplp1	6.85E-05	0.38263229	Cont	Bone
Ltbp1	4.04E-06	0.382100373	Cont	Fibro
Lap3	0.017473351	0.381867024	Cont	Bone
Zfp282	0.083149362	0.381189215	Cont	Bone
Ripk1	0.016714623	0.381126376	Cont	Bone
Gpr137	0.45493944	0.379600721	Cont	Bone
Scpep1	0.728823342	0.379383802	Cont	Bone
Txnip	0.113258922	0.379154618	Cont	Bone
Pdha1	0.013818633	0.378510577	Cont	Bone
Rbbp6	0.01209468	0.378508422	Cont	Bone
Gm26916	0.000241595	0.378488595	Cont	Bone
Crabp1	1.09E-06	0.377881829	Cont	Fibro
Rmnd5a	0.08552427	0.377127148	Cont	Bone
Cars	0.246502152	0.376890183	Cont	Bone
C4b	0.025890205	0.376807738	Cont	Fibro
Masp1	0.000103591	0.3752756	Cont	Fibro
Npr2	0.110070603	0.37510459	Cont	Bone
Spin1	0.007397796	0.374083608	Cont	Bone
Eif2s1	0.038612391	0.374042655	Cont	Bone
R3hdm4	0.108889657	0.373907586	Cont	Bone
Mxd4	0.141941176	0.373311056	Cont	Bone
Smap1	0.039788143	0.373248264	Cont	Bone
Sirpa	0.036561008	0.372929313	Cont	Bone
Csnk1g3	0.028766974	0.372454361	Cont	Bone
Gas1	0.124006472	0.3720401	Cont	Bone
Actn1	0.09170997	0.371948303	Cont	Bone
Gosr2	0.11797956	0.371331988	Cont	Bone
Cldn1	0.002028466	0.370916759	Cont	Bone
Tmem208	0.539838528	0.370835982	Cont	Bone
Ddx39	0.705413596	0.369098987	Cont	Bone
Selenos	0.01408625	0.368927854	Cont	Bone
Ulk1	0.105053064	0.368911958	Cont	Bone
Ndufa3	0.004666566	0.368879226	Cont	Bone
Xist	1.19E-08	0.367621066	Cont	Fibro
Smox	0.012619216	0.367236021	Cont	Bone
Tmem54	0.079378192	0.367217592	Cont	Bone
Mfap4	0.048062711	0.366710556	Cont	Bone
Erlec1	0.073714294	0.366448722	Cont	Bone
Lman1	0.394714159	0.366070674	Cont	Bone
Wnt5a	0.025507509	0.365993106	Cont	Bone
Pum3	0.136103902	0.365067186	Cont	Bone
Omd	0.12457629	0.364231078	Cont	Bone
Calcoco1	0.013938971	0.363550587	Cont	Bone
Mkln1	0.07139263	0.362643157	Cont	Bone
Acadl	0.068811946	0.362270541	Cont	Bone
Krtap4-7	0.022072665	0.362048195	Cont	Fibro
Lrrc1	0.060148894	0.361598825	Cont	Bone
Mxd4	8.98E-09	0.361393438	Cont	Fibro
Cdc16	0.009604231	0.360756336	Cont	Bone
Krtap13	0.000154438	0.360627473	Cont	Fibro
Adprh	0.189768052	0.360473346	Cont	Bone
Higd1a	0.001545861	0.360308243	Cont	Bone
Tent2	0.000103746	0.359792749	Cont	Bone
Elavl1	0.037800901	0.359594984	Cont	Bone
Golph3	0.350210616	0.357869767	Cont	Bone
Tusc2	0.003550176	0.357785166	Cont	Bone
Isca1	0.033374402	0.357104573	Cont	Bone
Tpra1	0.018037347	0.356801538	Cont	Bone
Vdac3	0.530351571	0.35654992	Cont	Bone
1110025L11Rik	0.09945569	0.356257585	Cont	Bone
Lrrc17	0.03945574	0.356146077	Cont	Bone
Lamc1	0.010670813	0.355981306	Cont	Bone
Gon4l	0.106192023	0.355902704	Cont	Bone
Col1a2	0.00578663	0.355622228	Cont	Bone
Eef2	6.91E-09	0.354044484	Cont	Fibro
Tmem192	0.009750974	0.353888851	Cont	Bone
Krtap9-1	0.00272062	0.353353099	Cont	Fibro
Leprot	0.026494023	0.352678099	Cont	Bone
Rsrc1	0.000673535	0.352488744	Cont	Bone
Gpsm2	0.135400763	0.35202092	Cont	Bone
Crispld2	1.41E-06	0.35128126	Cont	Fibro
Vcp	0.012182369	0.351188656	Cont	Bone
Mapk3	0.109002047	0.350745959	Cont	Bone
Mxra8	0.081659477	0.350271996	Cont	Bone
Ppp2cb	0.047176395	0.349725244	Cont	Bone
Grasp	0.16208173	0.349320737	Cont	Bone
Cdh11	1.06E-05	0.3480588	Cont	Fibro
Ifi27	0.231698538	0.347652566	Cont	Bone
Nucb1	2.82E-06	0.347556381	Cont	Fibro
Mpzl1	0.062220738	0.347508374	Cont	Bone
Crot	0.014408538	0.347136608	Cont	Bone
Ddx17	0.014865781	0.34687104	Cont	Bone
Vmp1	0.275827915	0.346165587	Cont	Bone
Laptm4b	1.63E-08	0.345978489	Cont	Fibro
Id2	0.062801433	0.345202021	Cont	Bone
Rpl21	0.002571691	0.344620183	Cont	Bone
Ccnd1	6.93E-05	0.344578231	Cont	Fibro
Epas1	4.97E-06	0.344552856	Cont	Fibro
Ndrg3	0.168969825	0.344529401	Cont	Bone
Lpar1	0.111986976	0.34386357	Cont	Bone
Fam162a	0.030789975	0.343776187	Cont	Bone
Loxl1	2.88E-06	0.343026722	Cont	Fibro
Stx5a	3.57E-06	0.342897094	Cont	Fibro
Gsk3b	0.810288653	0.341995641	Cont	Bone
Acp5	0.028665767	0.341197232	Cont	Bone
Ube2q2	0.118857803	0.340959695	Cont	Bone
Nckap5l	0.070452273	0.340333501	Cont	Bone
Marcks	0.018640528	0.3395587	Cont	Bone
Otulinl	0.009239531	0.339349518	Cont	Bone
Smg7	0.130395587	0.339000395	Cont	Bone
Klf13	0.019309983	0.338175837	Cont	Bone
H2-Aa	9.02E-05	0.337701224	Cont	Fibro
Mfap1b	0.000451546	0.337090725	Cont	Bone
Zc3h4	0.112929589	0.337023369	Cont	Bone
Atn1	1.32E-06	0.336814042	Cont	Fibro
Zfand2b	0.072567399	0.336674861	Cont	Bone
Lfng	3.38E-07	0.335505749	Cont	Fibro
Apoe	0.204770766	0.333237497	Cont	Bone
Fap	0.274037686	0.3331853	Cont	Bone
Grhl1	0.055819094	0.332866984	Cont	Bone
Col5a2	0.00016777	0.332849155	Cont	Fibro
Leprotl1	0.343871851	0.332225704	Cont	Bone
Itga5	0.092772495	0.332077749	Cont	Bone
Sec23a	0.029854192	0.332009033	Cont	Bone
Ndufa6	0.203859052	0.331759219	Cont	Bone
Galnt10	0.077511957	0.331170876	Cont	Bone
Calu	1.02E-05	0.330805118	Cont	Fibro
Pbx1	0.04019086	0.330724525	Cont	Bone
Man2a2	0.363194856	0.330665732	Cont	Bone
Brk1	0.178988838	0.330527543	Cont	Bone
Bola2	0.822629447	0.329787137	Cont	Bone
Ythdf3	0.029051067	0.329486427	Cont	Bone
Rpl22l1	0.005570635	0.329293505	Cont	Bone
Slc38a10	0.305429337	0.329264956	Cont	Bone
Mrps35	0.387680793	0.328942079	Cont	Bone
Adh5	0.143669813	0.328597027	Cont	Bone
Cped1	0.084417487	0.327881937	Cont	Bone
Bgn	0.138916144	0.327550404	Cont	Bone
C1qtnf6	0.098133014	0.326741324	Cont	Bone
Pafah1b3	0.008767974	0.326657994	Cont	Bone
Tmed2	0.011290409	0.32616178	Cont	Bone
Csf1r	0.055337549	0.325877645	Cont	Bone
Rgs10	0.050616658	0.325749729	Cont	Bone
Bambi	3.02E-06	0.325338723	Cont	Fibro
Tpp2	0.367529984	0.325187354	Cont	Bone
Epn1	0.161944028	0.325108308	Cont	Bone
Bag1	0.173627196	0.324950205	Cont	Bone
Tcp11l2	0.001504026	0.324895228	Cont	Bone
Cux1	1.51E-06	0.324342731	Cont	Fibro
Mycbp2	0.057889039	0.323867856	Cont	Bone
Fam3c	0.042068071	0.323294159	Cont	Bone
Eif3m	0.211498943	0.323026789	Cont	Bone
Fgfr1	0.144817173	0.322977115	Cont	Bone
D630033O11Rik	0.013348023	0.322757564	Cont	Bone
Zfp865	0.245660316	0.3227457	Cont	Bone
Ttc3	0.011167027	0.322682108	Cont	Bone
Emc6	0.062541347	0.322670413	Cont	Bone
Ctnnb1	0.030075027	0.322658646	Cont	Bone
Pcnx3	0.018076065	0.322228173	Cont	Bone
Gm11595	0.000249523	0.321983121	Cont	Bone
Ccdc80	0.000106101	0.32152487	Cont	Fibro
Tmf1	0.006099394	0.32102119	Cont	Bone
Slc39a1	0.129987077	0.320873992	Cont	Bone
Phactr4	0.002861749	0.320860683	Cont	Bone
Nudcd2	0.027644512	0.320766954	Cont	Bone
Fst	0.042364205	0.32074762	Cont	Bone
Rgs5	8.59E-05	0.320284133	Cont	Fibro
Ptprd	0.034233952	0.319989111	Cont	Bone
Bicc1	0.063842299	0.319795885	Cont	Bone
Cald1	3.51E-05	0.319548635	Cont	Fibro
Rit1	0.200020807	0.319491893	Cont	Bone
Ncoa6	0.005939327	0.319018707	Cont	Bone
Gdi1	0.281315281	0.319016941	Cont	Bone
Myl9	1.27E-05	0.318974307	Cont	Fibro
Mrc2	0.446367037	0.31890655	Cont	Bone
Podxl2	0.310719584	0.318768881	Cont	Bone
Prg4	0.145949685	0.318488737	Cont	Bone
Taf13	0.186735	0.316986149	Cont	Bone
Aurkaip1	0.001926087	0.316596788	Cont	Bone
Hnrnpa1	0.062568716	0.316379698	Cont	Bone
Mcam	0.000266733	0.31634994	Cont	Fibro
Aplp1	0.000759032	0.316251457	Cont	Bone
Gnas	0.018757272	0.31612156	Cont	Bone
Cabin1	0.24857652	0.316098515	Cont	Bone
Mt3	0.472418972	0.3160283	Cont	Bone
Mrc2	6.03E-05	0.314938794	Cont	Fibro
Med14	0.02369788	0.314596774	Cont	Bone
Clpx	0.017030377	0.313292346	Cont	Bone
H2-K1	0.017848787	0.313027071	Cont	Bone
Dusp14	9.24E-07	0.312351706	Cont	Fibro
Slc7a11	6.02E-05	0.310887567	Cont	Fibro
Klk14	0.003159001	0.310862702	Cont	Bone
Os9	0.019040985	0.310823024	Cont	Bone
Ccnd2	5.01E-06	0.310622993	Cont	Fibro
Sypl	0.160298541	0.310420282	Cont	Bone
Zzef1	0.024072364	0.310333146	Cont	Bone
Snx12	0.04062705	0.309412093	Cont	Bone
Egfl7	3.61E-05	0.309397179	Cont	Fibro
Hmg20b	0.024957394	0.309391784	Cont	Bone
Gpx3	0.22929685	0.309390676	Cont	Bone
Wdr33	0.775140192	0.309230503	Cont	Bone
Abcg1	0.000700987	0.309139118	Cont	Bone
Krt31	0.001306878	0.308778812	Cont	Fibro
Capg	0.069084545	0.308260236	Cont	Bone
Tfrc	0.376704319	0.307803973	Cont	Bone
Mlf2	0.031359859	0.307454123	Cont	Bone
Pxdn	0.158985278	0.307398735	Cont	Bone
Tnfaip2	0.316664206	0.307291894	Cont	Bone
Plbd2	6.12E-06	0.30669977	Cont	Fibro
Pwwp2b	0.02388905	0.306600684	Cont	Bone
Jade2	0.122704653	0.30657793	Cont	Bone
Prelid1	0.013471047	0.306011495	Cont	Bone
Ankrd17	0.012696002	0.305242882	Cont	Bone
Cpz	0.586764796	0.305113648	Cont	Bone
Bc1	0.025064963	0.305071023	Cont	Bone
Wdfy2	0.679952123	0.30485986	Cont	Bone
Cadm4	0.034206781	0.304725194	Cont	Bone
Kat6a	0.27462408	0.304350306	Cont	Bone
Cxcl14	0.040788974	0.304300343	Cont	Bone
Prss53	0.00297384	0.304220191	Cont	Bone
Plekhg2	0.038533063	0.30409334	Cont	Bone
Snhg18	0.164128322	0.303826058	Cont	Bone
Epn1	1.12E-05	0.303696429	Cont	Fibro
2700038G22Rik	0.000834691	0.303361989	Cont	Bone
Tomm6	0.016627094	0.30321437	Cont	Bone
2310034C09Rik	0.000993559	0.30297091	Cont	Fibro
Cd74	0.047916552	0.302890033	Cont	Bone
Exosc4	0.059692474	0.302870296	Cont	Bone
Terf2	0.040221452	0.301230287	Cont	Bone
Col8a1	3.04E-05	0.300924824	Cont	Fibro
Fyttd1	1.63E-08	0.299909536	Cont	Fibro
Ralgps2	0.071269864	0.299826342	Cont	Bone
Gm49425	0.121235163	0.299748681	Cont	Bone
Pkig	0.047325612	0.298696301	Cont	Bone
Snn	0.013206933	0.298278421	Cont	Bone
St5	2.51E-06	0.298018117	Cont	Fibro
Lrrfip1	0.023938501	0.298003659	Cont	Bone
Ids	0.04821218	0.297611467	Cont	Bone
Ensa	0.929653506	0.297257762	Cont	Bone
Spon1	0.059616198	0.297083712	Cont	Bone
Zfp260	0.236840556	0.296974443	Cont	Bone
Tmed9	0.037646709	0.29644556	Cont	Bone
Telo2	0.002834336	0.295758491	Cont	Bone
Napa	0.036188899	0.295681465	Cont	Bone
Alg10b	0.127140752	0.295281023	Cont	Bone
Wls	0.032803141	0.294652088	Cont	Bone
Pqlc2	0.02522676	0.294629795	Cont	Bone
Dap	0.041278004	0.293239148	Cont	Bone
Dynll2	0.00125889	0.293064768	Cont	Fibro
Itpripl2	0.196916478	0.293053165	Cont	Bone
Mydgf	0.308756818	0.292053049	Cont	Bone
Mrpl4	0.608631109	0.291964309	Cont	Bone
Fbxw4	0.001790417	0.291555946	Cont	Bone
Lyg1	0.032136909	0.291510203	Cont	Fibro
Tox4	0.007510039	0.291490147	Cont	Bone
Lgals3bp	0.000117288	0.290914892	Cont	Fibro
Dlgap4	0.102799459	0.290804587	Cont	Bone
Gna11	0.102650052	0.290750961	Cont	Bone
Grn	0.000154663	0.290216388	Cont	Fibro
Nedd8	0.003519256	0.28998658	Cont	Bone
Ccdc115	0.124719044	0.289690975	Cont	Bone
Cdh5	0.174742231	0.289431311	Cont	Bone
Mfap5	0.001988183	0.289427204	Cont	Fibro
Fuca1	6.70E-06	0.289396887	Cont	Fibro
Me2	0.020047254	0.289311452	Cont	Bone
Thbs2	0.000403676	0.289057249	Cont	Fibro
Uri1	0.665041425	0.289004669	Cont	Bone
Lsm12	0.088834101	0.288859857	Cont	Bone
Zcchc24	0.097650696	0.28878786	Cont	Bone
Naa80	0.852497996	0.288697267	Cont	Bone
Tmem205	0.328695542	0.288646466	Cont	Bone
Sparcl1	1.59E-05	0.288501955	Cont	Fibro
Nfatc4	0.000566244	0.288501955	Cont	Fibro
Cdo1	0.478502333	0.288318765	Cont	Bone
Col27a1	0.099613446	0.287584534	Cont	Bone
Atp6v0e	0.00833519	0.287517989	Cont	Bone
Anapc11	0.173861502	0.286951905	Cont	Bone
Htra3	0.040830153	0.286888888	Cont	Bone
Sfi1	0.154075313	0.286864728	Cont	Bone
Ntn1	0.017162021	0.28668326	Cont	Bone
Axl	3.92E-05	0.286658255	Cont	Fibro
Scarf2	0.000180628	0.286527297	Cont	Fibro
Arl4c	0.002557402	0.286291231	Cont	Bone
Ppfibp1	0.003308933	0.286225061	Cont	Bone
Zc3h11a	0.174080605	0.285859503	Cont	Bone
Csrp2	0.002236169	0.285665562	Cont	Bone
Ubfd1	0.018812358	0.285549326	Cont	Bone
Lbh	0.350900495	0.285366914	Cont	Bone
Grb10	0.062860605	0.285129699	Cont	Bone
Atp5g2	0.003738458	0.284455303	Cont	Bone
Rbfox2	0.160344742	0.283937784	Cont	Bone
Tmem266	0.004636881	0.283778589	Cont	Bone
Cgnl1	0.060543284	0.283194988	Cont	Bone
Adgra2	0.008016787	0.282678157	Cont	Bone
Ass1	0.043480147	0.281685384	Cont	Bone
C1s1	0.000731487	0.281340894	Cont	Fibro
Vamp2	0.577921354	0.280110639	Cont	Bone
Tmem179b	0.270410695	0.280106481	Cont	Bone
Igsf10	0.000347556	0.279196941	Cont	Fibro
Nbdy	0.053049325	0.279156342	Cont	Bone
Elk4	0.108679086	0.27914065	Cont	Bone
Dnajc13	0.223546943	0.278604937	Cont	Bone
Megf6	0.000792173	0.2785665	Cont	Fibro
Tmem59	0.020010939	0.278523699	Cont	Bone
Gcn1	0.286992557	0.277775394	Cont	Bone
Spon1	0.000376514	0.277285725	Cont	Fibro
Slc24a3	0.003987668	0.276958543	Cont	Bone
Inhba	0.091362459	0.2763653	Cont	Bone
Spink6	0.103436647	0.276308662	Cont	Fibro
Hsbp1	0.707659896	0.275660071	Cont	Bone
Wipf1	0.199525803	0.275327992	Cont	Bone
Ptprb	1.32E-06	0.275038548	Cont	Fibro
Rpn2	0.005807776	0.274938915	Cont	Bone
Hdac7	0.047071194	0.274760395	Cont	Bone
Ldhb	0.256194932	0.274450429	Cont	Bone
Scarf2	0.123725188	0.274415116	Cont	Bone
Tap2	0.076750096	0.273917872	Cont	Bone
Mea1	0.219853072	0.273847368	Cont	Bone
Slc20a2	0.008584046	0.273833855	Cont	Bone
Grcc10	0.198669118	0.273325345	Cont	Bone
Gmfb	0.038580007	0.273126236	Cont	Bone
Yipf5	0.027635668	0.272926527	Cont	Bone
Ptges	0.181524074	0.272846363	Cont	Bone
Gde1	0.504750368	0.27224625	Cont	Bone
Sh3bp1	0.874987041	0.272074856	Cont	Bone
Kirrel	0.104293791	0.27203802	Cont	Bone
Igsf10	0.052944018	0.272016409	Cont	Bone
App	0.118493228	0.271980213	Cont	Bone
Ahr	1.66E-06	0.271940112	Cont	Fibro
Rab34	0.114241008	0.271806886	Cont	Bone
Slc6a6	6.49E-05	0.271163583	Cont	Fibro
Dpf2	0.090378935	0.270903015	Cont	Bone
Col6a1	0.019796089	0.270602659	Cont	Fibro
Lamp2	0.040407146	0.270339274	Cont	Bone
Krtap16-3	0.315393166	0.270177413	Cont	Bone
Ppp2ca	0.005681375	0.270104426	Cont	Bone
C1qtnf6	0.003321033	0.269875939	Cont	Fibro
Mbp	0.018604387	0.269407448	Cont	Fibro
Ppp2r2d	0.552361387	0.269152648	Cont	Bone
Fes	3.30E-05	0.269035151	Cont	Fibro
Fam89b	0.595105636	0.26888472	Cont	Bone
Epb41l2	0.316409416	0.268532702	Cont	Bone
Sh3bgrl	0.169551453	0.268449049	Cont	Bone
Fastk	0.266184951	0.268414896	Cont	Bone
Cmtm3	5.84E-05	0.268230916	Cont	Fibro
Col4a2	0.230546262	0.267664117	Cont	Bone
Dbnl	0.273947357	0.267339687	Cont	Bone
Ptn	0.066486539	0.266765206	Cont	Bone
Srp14	0.151241221	0.266708743	Cont	Bone
Eci2	0.809252601	0.266604064	Cont	Bone
Cpm	0.060985033	0.266311202	Cont	Bone
Gmpr2	0.073024637	0.266241129	Cont	Bone
Flna	9.34E-06	0.265534146	Cont	Fibro
Tango2	0.004538628	0.26542221	Cont	Bone
Gm49890	0.018088431	0.265317364	Cont	Bone
Tax1bp3	0.133138009	0.26510601	Cont	Bone
Commd8	0.023384823	0.264801089	Cont	Bone
Ftl1	0.038964891	0.264296875	Cont	Bone
Trim28	0.05299786	0.263962468	Cont	Bone
Aup1	0.83782424	0.263915842	Cont	Bone
Faf2	0.210237907	0.263322913	Cont	Bone
Pdlim2	0.556991404	0.263151586	Cont	Bone
Polr2a	0.050842624	0.262358554	Cont	Bone
Igfbp4	0.249388086	0.262191467	Cont	Bone
Akap8l	0.000103961	0.262068807	Cont	Fibro
Tatdn2	0.149082128	0.261819984	Cont	Bone
Duox1	0.000608415	0.261644048	Cont	Fibro
Cygb	0.000325456	0.261513505	Cont	Fibro
Inppl1	0.256424791	0.261397572	Cont	Bone
Mrpl30	0.14943977	0.261229815	Cont	Bone
Gprc5d	5.83E-05	0.260595958	Cont	Fibro
Tpst1	0.068154624	0.260502583	Cont	Bone
Luc7l3	0.632210392	0.260325415	Cont	Bone
Gm10061	0.062955693	0.259559476	Cont	Bone
Adamts2	0.000345538	0.259542924	Cont	Fibro
Rnpepl1	0.01792064	0.259525757	Cont	Bone
Rab7b	0.029275004	0.259505694	Cont	Bone
Rrbp1	0.000993784	0.258943412	Cont	Fibro
Zfand5	0.256868887	0.258316289	Cont	Bone
Fhl1	0.689427384	0.258205221	Cont	Bone
Efna4	0.347679722	0.258122682	Cont	Bone
Pbrm1	2.17E-06	0.258048634	Cont	Fibro
Fam171a1	0.091519609	0.258015987	Cont	Bone
Gtf2i	5.64E-05	0.257219569	Cont	Fibro
Slc37a2	0.305921149	0.256547638	Cont	Bone
Cox7c	0.019407421	0.256205114	Cont	Bone
Lbr	0.083906613	0.256193608	Cont	Bone
Synpo	2.91E-05	0.255907678	Cont	Fibro
Ptk7	7.51E-05	0.255790372	Cont	Fibro
Snrpc	0.08819807	0.25568272	Cont	Bone
Ccnd3	0.38667953	0.255652112	Cont	Bone
Cdv3	0.529577059	0.255583564	Cont	Bone
Cic	0.794587881	0.255244877	Cont	Bone
Zmym2	0.029197142	0.2551641	Cont	Bone
Cpt1a	0.006916276	0.254954195	Cont	Bone
Fkbp9	0.000893576	0.254949395	Cont	Fibro
Slc5a3	4.84E-06	0.254949395	Cont	Fibro
Xrcc1	0.115902658	0.254837164	Cont	Bone
Cnn3	0.141397643	0.254723807	Cont	Bone
Hebp1	0.033616072	0.254322959	Cont	Bone
Ifi30	0.020150454	0.2542978	Cont	Bone
Ncstn	0.012987531	0.253908256	Cont	Bone
Malat1	0.026811948	0.253677738	Cont	Fibro
Tvp23b	0.739049174	0.253477591	Cont	Bone
2900097C17Rik	0.168697282	0.253281443	Cont	Bone
Dlg5	1.28E-05	0.252886929	Cont	Fibro
Lncppara	0.103757163	0.252377016	Cont	Bone
Zpr1	0.058235997	0.252292261	Cont	Bone
Tkt	0.041386011	0.252116263	Cont	Bone
Msx1	0.161799959	0.251869187	Cont	Bone
Dpp3	0.424315994	0.251864695	Cont	Bone
Pip4p1	0.295927146	0.251711947	Cont	Bone
Slc12a4	0.454165382	0.25165589	Cont	Bone
Ddah2	0.386787443	0.251336856	Cont	Bone
Bptf	0.031740258	0.251179	Cont	Bone
Mfn2	0.108426449	0.251168648	Cont	Bone
Babam1	0.210221812	0.250926227	Cont	Bone
Fam214b	0.15475415	0.250861358	Cont	Bone
Atp6ap2	8.23E-05	0.250662037	Cont	Fibro
Sptlc2	0.202515652	0.250393844	Cont	Bone
Vcam1	0.287052475	0.2503704	Cont	Bone
Pkd1	0.000585357	0.250362126	Cont	Fibro
Vps72	0.196703726	0.250137982	Cont	Bone
Sdc3	0.850124119	0.250054542	Cont	Bone
Vmp1	0.001067218	0.249878406	Cont	Fibro
Malat1	0.052556859	0.249697362	Cont	Bone
Cdc25b	0.29357794	0.249520371	Cont	Bone
Bmpr1a	0.199683131	0.249158643	Cont	Bone
Rtl8b	0.018556867	0.249089036	Cont	Bone
Bclaf1	0.980910211	0.248928643	Cont	Bone
Vps29	0.509452189	0.248842588	Cont	Bone
Ro60	0.249285195	0.248841813	Cont	Bone
Rxra	0.000380786	0.248797168	Cont	Fibro
Olfml2b	0.177165972	0.248780763	Cont	Bone
Rnaset2a	0.219109125	0.24855493	Cont	Bone
Sertad2	0.507215912	0.248457614	Cont	Bone
Cpxm2	2.05E-06	0.248223532	Cont	Fibro
Dnm1	0.001091547	0.247656903	Cont	Fibro
Loxl2	0.001015039	0.247402586	Cont	Fibro
Itgb5	0.002741868	0.247336211	Cont	Fibro
Eny2	0.430714025	0.247069995	Cont	Bone
Magoh	0.130410322	0.246828223	Cont	Bone
Etl4	0.031058324	0.246668933	Cont	Bone
Fmod	0.025435171	0.246467332	Cont	Fibro
Ypel5	8.17E-06	0.246179186	Cont	Fibro
F5	1.00E-05	0.246112032	Cont	Fibro
Otub2	0.031446692	0.245639128	Cont	Bone
Thap3	0.363197471	0.245636875	Cont	Bone
Arhgef25	0.286189194	0.245630146	Cont	Bone
Fos	0.212309012	0.245611208	Cont	Bone
Csrp2	3.97E-05	0.245500332	Cont	Fibro
Egfl7	0.282186901	0.245479956	Cont	Bone
Usp4	0.000263529	0.245363346	Cont	Fibro
Pxdn	4.05E-05	0.245168374	Cont	Fibro
Gpr137b	0.47592784	0.245123409	Cont	Bone
Vcam1	8.48E-06	0.244532779	Cont	Fibro
Akr1b3	0.429200123	0.244236865	Cont	Bone
Col23a1	1.31E-05	0.244149994	Cont	Fibro
Sh3bgrl3	0.06290555	0.243789483	Cont	Bone
Hcfc1	1.96E-05	0.243690278	Cont	Fibro
Ascc2	2.81E-07	0.243445423	Cont	Fibro
Spag9	0.176505511	0.243000161	Cont	Bone
Pnpla2	0.117091953	0.242857956	Cont	Bone
Krtap4-2	0.000164703	0.242349358	Cont	Fibro
Pdlim7	0.00023568	0.242125355	Cont	Fibro
Mtpn	0.219312481	0.241943273	Cont	Bone
Bax	0.140200486	0.241897615	Cont	Bone
Ajuba	3.99E-05	0.241859396	Cont	Fibro
2900026A02Rik	5.13E-05	0.241859396	Cont	Fibro
Fundc2	0.021302012	0.241827484	Cont	Bone
Ralgds	0.453685584	0.241729295	Cont	Bone
Ap2a1	0.103982107	0.24169551	Cont	Bone
Rab27b	0.02442056	0.241585031	Cont	Bone
Fam129b	0.677394234	0.241574189	Cont	Bone
Gpi1	0.008189843	0.241463107	Cont	Bone
Cd47	0.23199952	0.241419025	Cont	Bone
Yif1a	0.411132167	0.24133926	Cont	Bone
Agrn	0.41646246	0.240812893	Cont	Bone
Galnt10	3.75E-05	0.240755514	Cont	Fibro
Crim1	0.065113073	0.240627552	Cont	Bone
Dnaja2	0.400915007	0.240601747	Cont	Bone
Unc50	0.139600563	0.240593041	Cont	Bone
Bmp1	0.001260969	0.240449825	Cont	Fibro
Pdhb	0.009853163	0.240228021	Cont	Bone
Copa	0.216583982	0.239649951	Cont	Bone
Ube2o	0.141412685	0.239433607	Cont	Bone
Ube2k	0.021599494	0.239106531	Cont	Bone
Ivns1abp	0.141946739	0.238694612	Cont	Bone
Colgalt1	0.063967052	0.23866668	Cont	Bone
Golgb1	0.207076826	0.238246649	Cont	Bone
Vwf	3.51E-05	0.238206131	Cont	Fibro
B4galnt1	1.03E-05	0.237875882	Cont	Fibro
Slc13a5	0.391321445	0.23763871	Cont	Bone
H2-Ab1	1.10E-05	0.237595828	Cont	Fibro
Lad1	0.007720406	0.237003748	Cont	Bone
Ube2r2	0.016867954	0.236886821	Cont	Bone
Ndufa7	0.323370369	0.236426457	Cont	Bone
Ppm1a	0.109428629	0.236335287	Cont	Bone
Rab2a	0.10185328	0.236062146	Cont	Bone
Tpr	0.256194932	0.236014995	Cont	Bone
Neat1	0.461970915	0.236014199	Cont	Bone
Cpsf6	0.05210602	0.235765405	Cont	Bone
Pygo2	0.000523243	0.235719924	Cont	Fibro
Col17a1	0.001024743	0.235644335	Cont	Fibro
Il3ra	4.31E-06	0.235429944	Cont	Fibro
Lpp	0.080848759	0.235360187	Cont	Bone
Cmtm4	0.068280738	0.235124326	Cont	Bone
St3gal3	0.299145935	0.235010136	Cont	Bone
Vamp8	0.18954381	0.234842073	Cont	Bone
Rae1	0.339734681	0.234826316	Cont	Bone
Pianp	6.21E-07	0.234677	Cont	Fibro
Bgn	0.003911553	0.234109052	Cont	Fibro
Abi1	0.028960674	0.234063398	Cont	Bone
Gas5	0.049973561	0.233905826	Cont	Bone
Timm9	0.116097348	0.233798197	Cont	Bone
Col15a1	0.001159665	0.233638889	Cont	Fibro
Mt3	9.93E-06	0.233458441	Cont	Fibro
Tmem214	0.000391658	0.233342939	Cont	Fibro
Kremen1	0.324439952	0.233207256	Cont	Bone
Col6a3	0.61455859	0.232981285	Cont	Bone
Parp3	6.07E-06	0.232753649	Cont	Fibro
Alx4	7.63E-05	0.232581582	Cont	Fibro
Neat1	0.000453589	0.232503377	Cont	Fibro
Rpl22	0.123579359	0.232407154	Cont	Bone
Gng11	0.007713493	0.232366256	Cont	Bone
Exoc7	0.634100287	0.23234186	Cont	Bone
Col5a1	0.002061484	0.232311591	Cont	Fibro
H13	6.87E-05	0.232074929	Cont	Fibro
Trappc3	4.47E-05	0.231932742	Cont	Fibro
Bmp1	0.949538719	0.231867269	Cont	Bone
Fscn1	0.197103226	0.231838216	Cont	Bone
Prrx1	0.000118225	0.231759768	Cont	Fibro
Olfml2a	2.00E-05	0.231544791	Cont	Fibro
Asah1	0.617558044	0.231493777	Cont	Bone
Glo1	0.000793561	0.231156284	Cont	Fibro
Pea15a	0.001391804	0.230926166	Cont	Fibro
Uqcrh	0.299804772	0.230899685	Cont	Bone
Sqstm1	0.922548949	0.230635718	Cont	Bone
Cd93	0.048178089	0.230524776	Cont	Bone
Plxna1	0.208493565	0.230388018	Cont	Bone
Tmem134	0.221377098	0.230387323	Cont	Bone
Thap4	0.000585786	0.230333204	Cont	Bone
Asna1	0.659746623	0.229698422	Cont	Bone
Mgat2	0.110050811	0.229684309	Cont	Bone
Angptl4	1.23E-05	0.229638307	Cont	Fibro
Api5	0.063831328	0.229203886	Cont	Bone
Gusb	0.865549751	0.229007667	Cont	Bone
Csf1r	0.000517303	0.229006128	Cont	Fibro
Use1	0.003955726	0.228939068	Cont	Fibro
Frrs1	0.025821645	0.228728966	Cont	Bone
Erp44	0.30274904	0.228567686	Cont	Bone
Nucb1	0.135752142	0.228550416	Cont	Bone
1110008P14Rik	0.29099311	0.228533207	Cont	Bone
Snx10	0.149943238	0.228501332	Cont	Bone
Vamp3	0.586195819	0.228493108	Cont	Bone
Sned1	0.000444453	0.228477184	Cont	Fibro
Ppp1r18	0.142849183	0.228357604	Cont	Bone
C2cd2	0.055198173	0.228139894	Cont	Bone
Igf1	1.39E-05	0.227904572	Cont	Fibro
Fam193b	0.000196041	0.227904572	Cont	Fibro
Tax1bp3	4.81E-05	0.227533938	Cont	Fibro
Gramd1a	0.311654267	0.227346699	Cont	Bone
Rcn2	0.06658515	0.227271327	Cont	Bone
Pla2g12a	0.002328603	0.227167335	Cont	Bone
Pcna	0.241315746	0.227149924	Cont	Bone
Copz1	0.000518798	0.227125713	Cont	Fibro
Get4	0.426181979	0.227107646	Cont	Bone
Dlx5	0.069049521	0.226292997	Cont	Bone
Tspan11	0.000164007	0.225985912	Cont	Fibro
Shmt2	0.325193515	0.225730399	Cont	Bone
Slc9a3r2	3.90E-05	0.225591216	Cont	Fibro
Ncor2	8.44E-05	0.225532907	Cont	Fibro
Matn2	0.162292515	0.225417093	Cont	Bone
Spryd3	0.246575223	0.224771244	Cont	Bone
Rb1	0.053058704	0.224473494	Cont	Bone
Sptan1	5.37E-05	0.224384429	Cont	Fibro
Lars2	0.010192007	0.224152957	Cont	Bone
Pabpc4	0.09986662	0.224081591	Cont	Bone
Ctsk	0.025206288	0.22374744	Cont	Fibro
Rab21	0.919449107	0.223708855	Cont	Bone
Ikbip	0.100761265	0.223701478	Cont	Bone
Cpt2	0.429217323	0.223685411	Cont	Bone
Nfic	0.000106866	0.223459109	Cont	Fibro
Rpn2	0.000148272	0.223240535	Cont	Fibro
Gm2000	0.498692381	0.222931428	Cont	Bone
Mir205hg	0.004734842	0.222709058	Cont	Fibro
Rhoq	0.013191818	0.222419527	Cont	Bone
Map4k5	0.1652053	0.222397497	Cont	Bone
S100a7a	0.004413877	0.222369758	Cont	Bone
Clcn4	0.000231686	0.222298609	Cont	Fibro
Nr3c1	0.166754776	0.222245596	Cont	Bone
Hipk1	0.470777547	0.222046505	Cont	Bone
Cbr2	0.115618612	0.221989755	Cont	Bone
Rnft1	0.120204154	0.221865397	Cont	Bone
Tapbp	0.00216094	0.221657933	Cont	Fibro
Mfsd14a	0.269205793	0.221637304	Cont	Bone
St6galnac4	0.000114486	0.221590798	Cont	Fibro
Napa	0.000651776	0.221590798	Cont	Fibro
Tns4	0.024218507	0.221225835	Cont	Bone
Tpm1	0.000285154	0.221225258	Cont	Fibro
Snx4	0.251041297	0.221157249	Cont	Bone
Dlx2	0.417362112	0.221090476	Cont	Bone
B2m	0.056560582	0.220852959	Cont	Bone
Ubl3	0.175665966	0.220544542	Cont	Bone
Cthrc1	0.127458986	0.220350147	Cont	Bone
Abca2	0.12541992	0.22003231	Cont	Bone
Pcolce	0.572693259	0.219940185	Cont	Bone
Cmtm7	0.090839833	0.219939171	Cont	Bone
Plat	0.039146556	0.219739965	Cont	Bone
Arhgef15	9.47E-05	0.219718384	Cont	Fibro
Srsf10	0.898447686	0.219658227	Cont	Bone
Mfge8	0.003280226	0.219642526	Cont	Fibro
Ube2h	0.238043159	0.219545177	Cont	Bone
Wdfy3	0.144611887	0.219416332	Cont	Bone
Luc7l3	2.91E-05	0.219221691	Cont	Fibro
F11r	0.001615183	0.219043367	Cont	Fibro
Sema4c	0.140591661	0.219006529	Cont	Bone
Sphk1	0.337203981	0.218955972	Cont	Bone
Plxnb2	0.158977528	0.218535444	Cont	Bone
Eif3h	0.007342076	0.218271768	Cont	Bone
Eif2b2	0.000150223	0.218022826	Cont	Fibro
Ndufs7	0.09388595	0.217984169	Cont	Bone
Fbn1	0.390725297	0.217692909	Cont	Bone
Sfpq	0.978286934	0.217467234	Cont	Bone
Lsp1	0.132672627	0.217452115	Cont	Bone
Ppp1cc	0.41825922	0.217085431	Cont	Bone
Ctsz	0.468030981	0.21703885	Cont	Bone
Fcgrt	0.000869997	0.21695093	Cont	Fibro
Cct7	0.103410864	0.216913016	Cont	Bone
Hsd17b12	0.374130924	0.216896517	Cont	Bone
Tbc1d2b	0.134636797	0.216363895	Cont	Bone
Mmp2	0.029087009	0.216281028	Cont	Bone
Krtap19-5	3.87E-06	0.215799641	Cont	Fibro
Rcbtb2	0.003422192	0.215635589	Cont	Bone
Cfap20	3.24E-05	0.215595893	Cont	Fibro
C2	0.000218421	0.215595893	Cont	Fibro
Crat	1.17E-05	0.215249271	Cont	Fibro
Pik3r2	0.511997212	0.215013152	Cont	Bone
Rpl41	0.099836176	0.214919178	Cont	Bone
Ski	0.602711124	0.214899437	Cont	Bone
Zfp106	0.376750092	0.214709015	Cont	Bone
Igfbp7	0.008220593	0.214641407	Cont	Fibro
Pigq	1.97E-05	0.214591658	Cont	Fibro
Kdelr2	0.897882834	0.21450375	Cont	Bone
Acat1	0.303876146	0.214432782	Cont	Bone
Plekhg3	3.33E-05	0.214367584	Cont	Fibro
Dst	0.001625538	0.214307411	Cont	Fibro
En1	2.61E-05	0.214203053	Cont	Fibro
Basp1	5.62E-05	0.214115678	Cont	Fibro
Gstm2	0.000370802	0.213977614	Cont	Fibro
Bcl2l1	0.429217323	0.213971593	Cont	Bone
Wls	0.000279632	0.213873452	Cont	Fibro
Hoxa11os	0.019729947	0.213389509	Cont	Bone
Pebp1	0.087183216	0.213375629	Cont	Bone
Efemp2	0.002914345	0.213370291	Cont	Fibro
Hprt	0.3700038	0.213293715	Cont	Bone
Lysmd2	0.339364498	0.213254315	Cont	Bone
Slc35b2	0.493617539	0.213105723	Cont	Bone
Pck2	0.425473355	0.213075037	Cont	Bone
Srrm2	0.000133324	0.212907624	Cont	Fibro
Cox17	0.250142185	0.212790402	Cont	Bone
Arhgef2	0.718137445	0.212526329	Cont	Bone
Mtmr6	0.195608539	0.212405958	Cont	Bone
Cop1	0.831827429	0.212310378	Cont	Bone
Gpc4	0.110514773	0.212253919	Cont	Bone
Psma6	0.057366673	0.212248377	Cont	Bone
Slc25a17	0.089696065	0.212178605	Cont	Bone
Msmo1	0.822684834	0.212169067	Cont	Bone
Polr3h	0.369462972	0.212131956	Cont	Bone
Arhgap23	0.000636558	0.211970195	Cont	Fibro
Aspn	0.110251032	0.211375342	Cont	Bone
Ctsb	0.000803993	0.211071567	Cont	Fibro
Mapre3	0.000251795	0.211057869	Cont	Fibro
Snai1	0.28494008	0.210887017	Cont	Bone
Golga7b	0.046959121	0.210776127	Cont	Bone
Anxa3	0.918260917	0.210734502	Cont	Bone
Krt2	0.000193511	0.210593727	Cont	Fibro
Dnmt3a	0.048468241	0.210540511	Cont	Bone
Zcrb1	0.139613603	0.210403521	Cont	Bone
Grik5	0.000974347	0.210105968	Cont	Fibro
Rcn3	0.001334697	0.210067796	Cont	Fibro
Chpf	0.339012897	0.209921152	Cont	Bone
Sf3b1	0.137460559	0.209825547	Cont	Bone
Eng	0.001739042	0.209661201	Cont	Fibro
Socs3	4.38E-05	0.209602238	Cont	Fibro
Rhog	3.52E-05	0.209397243	Cont	Fibro
Rpl38	0.129168983	0.209392453	Cont	Bone
Dym	0.650423026	0.209337474	Cont	Bone
Ctdsp2	0.46357066	0.2092815	Cont	Bone
Smarcc1	0.387680793	0.209185511	Cont	Bone
F2r	0.00027712	0.209111859	Cont	Fibro
Atp6v1g1	0.045832146	0.208927264	Cont	Bone
Btg3	0.285878778	0.208690471	Cont	Bone
Fzd1	0.008383939	0.208655743	Cont	Fibro
Ddost	0.193854565	0.208599309	Cont	Bone
Tmem115	0.713954666	0.208505608	Cont	Bone
Hdac7	3.15E-05	0.208439431	Cont	Fibro
Dkk3	0.661421507	0.208232914	Cont	Bone
Chfr	0.444227373	0.208027528	Cont	Bone
Ehmt2	0.000396643	0.207992326	Cont	Fibro
Sec31a	0.168739644	0.207810027	Cont	Bone
Foxn3	0.000204364	0.207244263	Cont	Fibro
Pik3r3	4.12E-06	0.207196264	Cont	Fibro
Igfbp5	0.001303014	0.207128758	Cont	Fibro
Hoxa9	0.000125771	0.207054705	Cont	Fibro
Rpl36al	0.468772985	0.207038445	Cont	Bone
Nol9	0.10114154	0.206918906	Cont	Bone
Map3k20	0.011700046	0.206782113	Cont	Fibro
Klk14	0.062105126	0.206782113	Cont	Fibro
Ptx3	0.675776614	0.206583658	Cont	Bone
Ano10	6.52E-05	0.206215572	Cont	Fibro
Mustn1	0.000923669	0.206215572	Cont	Fibro
Tmem9	0.069950708	0.206179682	Cont	Bone
Qk	0.263288685	0.206169013	Cont	Bone
Atp8b2	0.003270514	0.206039795	Cont	Fibro
Dpt	0.00031892	0.205934615	Cont	Fibro
Vcl	0.880322286	0.20577158	Cont	Bone
Hoxa11os	2.06E-05	0.205659988	Cont	Fibro
Scara3	0.007745646	0.204961259	Cont	Fibro
Hspb1	0.004804869	0.204923935	Cont	Fibro
Hint1	0.20631695	0.204783394	Cont	Bone
Elovl5	0.458928282	0.204727295	Cont	Bone
Pmepa1	0.006613957	0.204636237	Cont	Fibro
Tsnax	0.344413983	0.204498298	Cont	Bone
Pdcd5	0.838940709	0.204380278	Cont	Bone
Myo9b	0.807900369	0.204257747	Cont	Bone
Tmem50a	0.002010411	0.20366889	Cont	Fibro
Fhl3	0.001245101	0.203473178	Cont	Fibro
Arhgdia	0.000427464	0.203419095	Cont	Fibro
C1qb	0.006848823	0.203419095	Cont	Fibro
Kdsr	0.085670336	0.203405376	Cont	Bone
Cuta	0.00010571	0.202997316	Cont	Fibro
Zfp207	0.042749595	0.202587579	Cont	Bone
Ufc1	0.001718878	0.20257883	Cont	Fibro
Ltbp2	0.69849426	0.202491894	Cont	Bone
Rab18	0.00056109	0.202387955	Cont	Fibro
Selenow	0.000715417	0.202184175	Cont	Fibro
Matr3	0.00012335	0.201861328	Cont	Fibro
Myo6	0.000669018	0.201861328	Cont	Fibro
Slc7a1	0.000489206	0.201769357	Cont	Fibro
Fstl1	0.414664868	0.201681805	Cont	Bone
Nid1	0.000485993	0.201680255	Cont	Fibro
Sf3a3	0.270061324	0.201428075	Cont	Bone
Bap1	0.029676061	0.201310423	Cont	Bone
Eif3k	0.155681684	0.201095809	Cont	Bone
Atp6v0a1	0.000109919	0.200954506	Cont	Fibro
Ccnd2	0.02312074	0.200654578	Cont	Bone
Xxylt1	0.001997303	0.20053129	Cont	Bone
Arl4c	0.024917751	0.200434147	Cont	Fibro
Extl3	0.567948314	0.200138943	Cont	Bone
Zdhhc20	0.097693552	0.200109521	Cont	Bone
Znrf1	0.415136059	0.200006563	Cont	Bone
Cant1	0.000142431	0.199874045	Cont	Fibro
Ifitm1	0.596696256	0.199821559	Cont	Bone
Dpep1	0.002556142	0.199807841	Cont	Fibro
Gpr87	0.025339605	0.19980337	Cont	Bone
Fam193b	0.248790697	0.199733794	Cont	Bone
Fbxl5	0.150787067	0.199569052	Cont	Bone
Zfp871	0.096380173	0.199185086	Cont	Bone
Slc27a1	0.134050343	0.198889479	Cont	Bone
Prdx4	0.262615301	0.198578776	Cont	Bone
Btg3	0.000432227	0.198403461	Cont	Fibro
Snx17	0.004533348	0.198329458	Cont	Fibro
Trim35	0.245326788	0.19807755	Cont	Bone
Itgav	0.003012317	0.19791845	Cont	Fibro
Prkaca	0.75330875	0.197746767	Cont	Bone
Mfap2	0.035872376	0.197744056	Cont	Fibro
Pdcd4	0.147442304	0.19769825	Cont	Bone
Tial1	0.383822394	0.197648811	Cont	Bone
Nrbp1	0.695051082	0.197462275	Cont	Bone
Cdk5rap3	0.719839945	0.197363714	Cont	Bone
Rgs5	0.527867649	0.197279485	Cont	Bone
Eif2b5	0.000635623	0.197196628	Cont	Fibro
Calm3	0.082470462	0.196895989	Cont	Bone
Eef1akmt1	0.031527503	0.196820962	Cont	Bone
Sat1	0.913577315	0.196618354	Cont	Bone
Bmpr2	0.241094273	0.196603958	Cont	Bone
Agfg1	0.167857472	0.196601334	Cont	Bone
Vipas39	0.132678212	0.196536559	Cont	Bone
G3bp2	0.292752656	0.196519164	Cont	Bone
Rps7	0.545736806	0.196204783	Cont	Bone
Steap2	1.83E-06	0.196055706	Cont	Fibro
Sin3b	0.000212378	0.196055706	Cont	Fibro
Tmem160	0.000283558	0.196055706	Cont	Fibro
Usp47	0.000342489	0.196055706	Cont	Fibro
Nisch	0.000408261	0.196055706	Cont	Fibro
Npdc1	0.006316944	0.196055706	Cont	Fibro
Marcks	0.027218417	0.196055706	Cont	Fibro
Ppp6r3	0.250297877	0.195880386	Cont	Bone
Brix1	0.472647577	0.195677956	Cont	Bone
Naa35	0.092038007	0.195557008	Cont	Bone
Aen	0.484841653	0.195489482	Cont	Bone
Fgfr3	0.794694202	0.195369967	Cont	Bone
Mapkapk2	0.870977343	0.195344562	Cont	Bone
Bub3	0.673435368	0.195163639	Cont	Bone
Ap2s1	0.000435956	0.195116146	Cont	Fibro
Pias1	0.175829088	0.195074973	Cont	Bone
Seh1l	0.345138172	0.195033326	Cont	Bone
Kidins220	0.001020942	0.194959017	Cont	Fibro
Smtn	0.000637628	0.194924624	Cont	Fibro
Podnl1	0.000113931	0.194785169	Cont	Fibro
Maged2	0.9402164	0.194725294	Cont	Bone
Lgmn	0.440341229	0.19471302	Cont	Bone
Shfl	5.32E-06	0.194635031	Cont	Fibro
Zfp36l2	0.232412131	0.194623416	Cont	Bone
Ahdc1	0.227615672	0.194320392	Cont	Bone
Psma1	0.523776895	0.194137842	Cont	Bone
Tgm1	0.03942637	0.194064161	Cont	Bone
Mrc1	0.052185579	0.193631683	Cont	Bone
Lrrc32	0.008935244	0.19354885	Cont	Fibro
Champ1	0.074031617	0.193515139	Cont	Bone
Atp13a2	0.000185873	0.193504521	Cont	Fibro
Slc35b1	0.000709525	0.193504521	Cont	Fibro
Acp5	0.990592937	0.193410985	Cont	Fibro
Ing1	0.441217715	0.193379643	Cont	Bone
Cox4i2	0.000236547	0.193310329	Cont	Fibro
Srsf3	0.101268367	0.193281557	Cont	Bone
Lrrc42	0.070360131	0.193267681	Cont	Bone
Egln1	0.189309669	0.193225113	Cont	Bone
Rpl34	0.022119178	0.193219904	Cont	Bone
Tmem123	0.977020966	0.193189736	Cont	Bone
Psmb1	0.002450362	0.193114091	Cont	Bone
Tmem50b	0.162584609	0.193101337	Cont	Bone
Cd248	0.361418794	0.192940226	Cont	Bone
Msx1	0.008320723	0.192853274	Cont	Fibro
Tmem158	0.062955693	0.192836914	Cont	Bone
Gldn	0.005037134	0.192792919	Cont	Fibro
Hmgcs1	0.270709409	0.192679758	Cont	Bone
Pam	0.005599193	0.192361223	Cont	Fibro
Dyrk1a	0.351514302	0.192238578	Cont	Bone
Kmt2e	4.90E-05	0.19221364	Cont	Fibro
Matn2	0.000175104	0.19216179	Cont	Fibro
Slc35c2	4.94E-05	0.192144194	Cont	Fibro
Diablo	0.477618169	0.192133563	Cont	Bone
Col1a2	0.004471479	0.192070571	Cont	Fibro
Fbln2	0.031029101	0.19199749	Cont	Fibro
Ifngr1	0.002982307	0.191939598	Cont	Fibro
Egfl8	0.003952854	0.191919932	Cont	Fibro
Slc44a2	0.016940112	0.191818713	Cont	Fibro
P2rx4	0.46435976	0.191743085	Cont	Bone
Eif4e	0.146629637	0.19122988	Cont	Bone
Canx	0.002544332	0.191173485	Cont	Fibro
Cbx6	0.000107355	0.191089453	Cont	Fibro
Rap2b	0.274047564	0.191088316	Cont	Bone
Ccdc88c	0.151589697	0.191042517	Cont	Bone
Ucp2	0.04357219	0.191021707	Cont	Bone
Acads	0.503713137	0.190520926	Cont	Bone
Syngr2	0.009875177	0.190473268	Cont	Bone
Nus1	0.26290378	0.190468833	Cont	Bone
Tnks1bp1	0.000808727	0.190226627	Cont	Fibro
Elovl5	0.001819167	0.190031918	Cont	Fibro
Eif2s3x	0.399288644	0.189881397	Cont	Bone
Col23a1	0.222508155	0.189741515	Cont	Bone
Timp2	0.00632837	0.189504121	Cont	Fibro
Lyz2	0.769767886	0.189441972	Cont	Bone
Trps1	0.876947605	0.189422	Cont	Bone
Rbm5	4.74E-05	0.189361054	Cont	Fibro
Serpina3n	0.000177573	0.189361054	Cont	Fibro
Igf2	0.000477222	0.18923444	Cont	Fibro
C1s1	0.163595979	0.188923229	Cont	Bone
Myl6	0.000421355	0.188840212	Cont	Fibro
Mospd1	0.022057403	0.188376196	Cont	Bone
Trip6	7.70E-05	0.188337793	Cont	Fibro
Ptpn12	0.166042692	0.188121572	Cont	Bone
Lasp1	0.687560515	0.187919553	Cont	Bone
Mmp2	0.045670959	0.187835199	Cont	Fibro
Eif3l	0.043472421	0.187741718	Cont	Bone
Map1lc3b	0.10424723	0.187718253	Cont	Bone
Cldn12	0.00736766	0.187702793	Cont	Bone
Chac1	0.000212476	0.187699154	Cont	Fibro
Rsrp1	0.614220883	0.187381732	Cont	Bone
Fam114a1	0.611637411	0.187324175	Cont	Bone
Nkd2	0.004090342	0.187262588	Cont	Fibro
Ifi30	0.007675351	0.187262588	Cont	Fibro
Cant1	0.735637368	0.187168259	Cont	Bone
Lims1	0.478237936	0.18704229	Cont	Bone
Anapc7	0.000737815	0.186945288	Cont	Fibro
Brd1	3.93E-05	0.186777893	Cont	Fibro
Lhfp	0.005909814	0.186777893	Cont	Fibro
Psmb2	0.056242491	0.186745624	Cont	Bone
Smyd2	0.141018639	0.186586713	Cont	Bone
Ndufv1	0.002906374	0.186504913	Cont	Fibro
Prrc2c	0.199350642	0.186436989	Cont	Bone
Rc3h1	0.19375581	0.186402223	Cont	Bone
Jmy	0.013188088	0.186348239	Cont	Bone
Aplp2	0.022363005	0.185974475	Cont	Bone
Wwp2	0.002366226	0.185907751	Cont	Fibro
Nat9	0.007244481	0.185601348	Cont	Fibro
Duoxa1	0.000285981	0.18554944	Cont	Fibro
Eif3d	0.206736456	0.185423455	Cont	Bone
Cat	0.000542895	0.185408462	Cont	Fibro
Pfkp	0.015868267	0.185286184	Cont	Fibro
Trim2	0.002779474	0.185047382	Cont	Fibro
Plat	0.005235428	0.185047382	Cont	Fibro
Cox5b	0.042006032	0.184984643	Cont	Bone
Htatsf1	0.427703555	0.184910992	Cont	Bone
Kif13a	0.191420946	0.184807211	Cont	Bone
Iqgap1	0.055562599	0.184702561	Cont	Bone
Cox7a2l	0.014293938	0.184628951	Cont	Bone
Pebp1	0.007566929	0.184560067	Cont	Fibro
Tbc1d20	0.224858329	0.184515602	Cont	Bone
Zc3h15	0.016916729	0.184391613	Cont	Bone
Gclm	0.053797626	0.1843047	Cont	Fibro
Mal	0.003180564	0.184246404	Cont	Fibro
Copb2	0.386683186	0.184188957	Cont	Bone
Firre	0.001279827	0.184027609	Cont	Fibro
Steap2	0.089447677	0.183903795	Cont	Bone
Maged1	0.004743362	0.1836985	Cont	Fibro
Tbc1d17	0.002840947	0.183564762	Cont	Fibro
Ndufb8	0.047377133	0.183380066	Cont	Bone
Cdc42ep5	0.570347159	0.183337771	Cont	Bone
Il1r2	8.56E-05	0.183319718	Cont	Fibro
Klf10	0.000567241	0.18311665	Cont	Fibro
Ddx6	0.305947722	0.183101835	Cont	Bone
Prrc2a	0.083860119	0.183027568	Cont	Bone
Eif2b2	0.45479571	0.182712998	Cont	Bone
4833439L19Rik	0.073864958	0.182502683	Cont	Bone
Naa60	0.002723532	0.182497601	Cont	Fibro
Fam20a	0.000175169	0.182261907	Cont	Fibro
Sbno2	0.000200825	0.182161264	Cont	Fibro
Atrx	0.00140885	0.182017873	Cont	Fibro
Sesn3	0.003690243	0.182017873	Cont	Fibro
Ccnl2	0.003241606	0.181863359	Cont	Fibro
Arhgap45	1.15E-05	0.181841847	Cont	Fibro
Atp6ap1	0.058550562	0.181697052	Cont	Bone
Lamc1	0.001547838	0.181645263	Cont	Fibro
Pqbp1	0.925249268	0.181610267	Cont	Bone
Plb1	0.00616662	0.18150295	Cont	Fibro
Hdac5	0.80863963	0.18149087	Cont	Bone
Rara	0.245141119	0.181148566	Cont	Bone
Fkbp1a	0.001541937	0.181122559	Cont	Fibro
Arl2	0.000274163	0.18068048	Cont	Fibro
Snrpb	0.434865314	0.180672323	Cont	Bone
Aip	0.881865603	0.180535312	Cont	Bone
Serhl	1.37E-05	0.180402442	Cont	Fibro
Gm49336	0.138568807	0.180154703	Cont	Bone
Zfas1	0.051616565	0.180092643	Cont	Bone
Mesd	0.001062022	0.179908284	Cont	Fibro
Smco4	0.104723913	0.179830283	Cont	Bone
Lama2	0.000114735	0.179815065	Cont	Fibro
C2	0.00734437	0.179627629	Cont	Bone
Hmg20b	0.000684349	0.179625362	Cont	Fibro
Srxn1	0.184692534	0.179615814	Cont	Bone
Wdr89	0.378133759	0.179555595	Cont	Bone
Rab2a	0.000590215	0.179181888	Cont	Fibro
Setd5	0.511150438	0.17909994	Cont	Bone
Reep3	0.003772572	0.178497335	Cont	Fibro
Samd4b	0.199585543	0.17832769	Cont	Bone
Med23	0.228707607	0.178325745	Cont	Bone
Cd59a	0.094929846	0.178205781	Cont	Bone
Itga3	0.573718859	0.178158734	Cont	Bone
Apoe	0.157881159	0.178028161	Cont	Fibro
Gaa	0.086215384	0.177990481	Cont	Bone
Tpm4	0.048219164	0.17795629	Cont	Fibro
Itpkb	0.002210788	0.177643669	Cont	Fibro
Rarres2	0.063570994	0.177559362	Cont	Fibro
Tgfb3	0.004204061	0.177278499	Cont	Fibro
Bicdl2	0.096032791	0.177135087	Cont	Bone
Ctsl	0.063164834	0.177091351	Cont	Bone
Mlec	0.003007596	0.176946883	Cont	Fibro
Stmn2	0.003369026	0.176946883	Cont	Fibro
Mtss2	0.346407462	0.17686658	Cont	Bone
Topors	0.213757594	0.176807063	Cont	Bone
Col18a1	0.013273055	0.176787372	Cont	Fibro
Hist1h1c	0.514954546	0.176698943	Cont	Bone
Yap1	0.001659171	0.176603343	Cont	Fibro
Stab1	0.742904104	0.176591906	Cont	Bone
Tnn	0.01048274	0.176413194	Cont	Fibro
Ttyh3	0.012411482	0.176403674	Cont	Bone
Egln3	0.002582491	0.176009764	Cont	Fibro
Mcfd2	0.580916473	0.175898657	Cont	Bone
Ctsb	0.788088656	0.175631577	Cont	Bone
Sf3b2	0.434160144	0.175546179	Cont	Bone
Lama4	0.00421649	0.175429056	Cont	Fibro
Smpd3	0.586128357	0.17541169	Cont	Bone
Trappc10	0.036695238	0.175408538	Cont	Bone
Sdcbp	0.236244609	0.175318322	Cont	Bone
Kctd17	0.004914251	0.175202391	Cont	Fibro
Laptm4a	0.004438334	0.175194649	Cont	Fibro
Erp29	0.217944406	0.175114196	Cont	Bone
Neurl4	0.000223683	0.175096087	Cont	Fibro
Fam20a	0.184151233	0.175018877	Cont	Bone
Capn2	0.26338609	0.174922126	Cont	Bone
Fabp4	0.002218007	0.17483922	Cont	Fibro
Lmo7	0.159713472	0.174834073	Cont	Bone
Tmem123	0.00673683	0.174736985	Cont	Fibro
Cstb	0.166419023	0.174638731	Cont	Bone
Srp9	0.692741423	0.174509512	Cont	Bone
Tacc2	0.001323761	0.174204985	Cont	Fibro
Zfhx4	0.017541201	0.174204985	Cont	Fibro
Osmr	0.083141096	0.174061409	Cont	Bone
Arglu1	0.002786481	0.173868088	Cont	Fibro
Colec12	0.014575812	0.173868088	Cont	Fibro
Mob4	0.001264356	0.173649293	Cont	Fibro
Ccn5	0.045813799	0.17341951	Cont	Fibro
Scd2	0.054458402	0.173276528	Cont	Bone
Sf1	0.028364632	0.173268305	Cont	Bone
Syde1	4.62E-05	0.173155304	Cont	Fibro
Zfp598	0.08713208	0.172753856	Cont	Bone
Arl4a	0.129522112	0.172533624	Cont	Bone
Gatad1	0.088221157	0.172453474	Cont	Bone
Fam98c	0.001131585	0.17242596	Cont	Fibro
Frg1	0.383689632	0.172369916	Cont	Bone
Ngdn	0.217190471	0.172184171	Cont	Bone
Ehd3	0.168748849	0.172144161	Cont	Bone
Sec62	0.329790897	0.172138911	Cont	Bone
Ostm1	3.17E-05	0.172092463	Cont	Fibro
Cfdp1	0.025031096	0.171908391	Cont	Bone
2410002F23Rik	0.00266445	0.171893655	Cont	Fibro
Ndufa10	0.003659172	0.171730284	Cont	Fibro
Dab2	0.007811921	0.171730284	Cont	Fibro
Isoc1	0.667462588	0.171601119	Cont	Bone
Elp2	0.000527284	0.17146004	Cont	Fibro
Rnf126	0.095120882	0.171172295	Cont	Bone
Vipr2	0.000427986	0.171061327	Cont	Fibro
Tomm70a	0.464986153	0.171059069	Cont	Bone
Il4ra	0.002712104	0.171010577	Cont	Fibro
Gm37797	0.034364197	0.170850366	Cont	Fibro
Crk	0.058404575	0.170597349	Cont	Bone
Lrp1	0.439258148	0.170551908	Cont	Bone
Sqstm1	0.004100762	0.170415885	Cont	Fibro
Afdn	0.014568733	0.170369062	Cont	Fibro
Grn	0.060457146	0.170357355	Cont	Bone
Ppdpf	0.478866242	0.170336871	Cont	Bone
Taok2	0.535672869	0.170082942	Cont	Bone
Col9a2	0.000128398	0.170060498	Cont	Fibro
Ythdf3	0.000746675	0.170060498	Cont	Fibro
Ncor1	0.077903815	0.169970797	Cont	Bone
Gm10076	0.042270345	0.169634509	Cont	Bone
Slc7a5	0.220611354	0.169510362	Cont	Bone
Ltbp1	0.128612432	0.169455271	Cont	Bone
Dut	0.022134528	0.169453066	Cont	Bone
Il10rb	0.102324511	0.169246759	Cont	Bone
Ss18	0.002152795	0.169136581	Cont	Fibro
2310057N15Rik	6.01E-05	0.169088659	Cont	Fibro
Mon2	0.000770924	0.169088659	Cont	Fibro
Hspa14	0.048413354	0.169059262	Cont	Bone
Lst1	0.000576774	0.169035492	Cont	Fibro
Ddrgk1	0.000984273	0.168716998	Cont	Fibro
Uqcr10	0.218490655	0.16870377	Cont	Bone
Vwa1	0.00025888	0.168649549	Cont	Fibro
Lrrc45	0.002068343	0.168649549	Cont	Fibro
Itm2c	0.010704868	0.168605728	Cont	Fibro
Polr2c	0.55675062	0.168565753	Cont	Bone
11-Sep	0.001486866	0.168399363	Cont	Fibro
Eid1	0.268272856	0.168337307	Cont	Bone
Mocs2	0.015566832	0.168322655	Cont	Bone
Fcer1g	0.008893554	0.168237762	Cont	Fibro
Adipor2	0.000806	0.168144568	Cont	Fibro
Pja1	0.002929944	0.168144568	Cont	Fibro
Pfdn6	0.989261495	0.167816522	Cont	Bone
Fuca1	0.167326508	0.167807509	Cont	Bone
Cd99l2	0.059867938	0.167683253	Cont	Bone
Npr2	0.001293686	0.167620627	Cont	Fibro
Cope	0.506219512	0.167561863	Cont	Bone
Rasa1	0.428447809	0.167489182	Cont	Bone
Eri3	0.000286594	0.167381397	Cont	Fibro
Map4k3	0.005560762	0.16736303	Cont	Fibro
Ogn	0.003625971	0.167278057	Cont	Fibro
Fkbp9	0.872093124	0.167248003	Cont	Bone
Retreg3	0.000980255	0.167227053	Cont	Fibro
Naglu	0.002046036	0.167227053	Cont	Fibro
Tspan3	0.149658398	0.167176885	Cont	Bone
Hpgd	0.038113185	0.167069328	Cont	Bone
Tnpo2	0.003277288	0.167007174	Cont	Fibro
Tbc1d10a	0.137733267	0.16688804	Cont	Bone
Idh2	0.835540335	0.166864849	Cont	Bone
Dvl3	0.339529792	0.166723735	Cont	Bone
Fzd6	0.173926953	0.166451766	Cont	Bone
Stard9	9.04E-07	0.166308363	Cont	Fibro
Ccdc80	0.412953344	0.166173593	Cont	Bone
Usp7	0.002041999	0.165998472	Cont	Fibro
Psmc2	0.001880543	0.165773139	Cont	Fibro
Cwh43	0.051089224	0.165773139	Cont	Fibro
Nudt9	0.058858488	0.16576402	Cont	Bone
Gna11	0.001299791	0.165682057	Cont	Fibro
Kansl2	0.000329733	0.165467386	Cont	Fibro
Cox7a2l	0.019754733	0.165432477	Cont	Fibro
Polr2h	0.006345213	0.165363327	Cont	Bone
Sdr16c6	0.000151737	0.165312183	Cont	Fibro
Uso1	0.402063282	0.165277922	Cont	Bone
S100a13	0.006480075	0.165249659	Cont	Fibro
Fam107b	0.025423747	0.165006301	Cont	Bone
Unc45a	0.014337432	0.164836975	Cont	Fibro
Limk2	0.007599568	0.164804772	Cont	Fibro
Snhg12	0.436461762	0.164679044	Cont	Bone
Col27a1	0.000602495	0.164623198	Cont	Fibro
Ppil4	0.499191095	0.164385941	Cont	Bone
Lamb2	0.016522161	0.164346846	Cont	Fibro
Plxdc2	0.819558594	0.164092762	Cont	Bone
Mtch2	0.003264289	0.164086597	Cont	Fibro
Mrpl36	0.001378178	0.164065592	Cont	Fibro
Ankrd13b	0.000160831	0.164040899	Cont	Fibro
Surf4	0.005654365	0.163975735	Cont	Fibro
Rpl26	0.030175393	0.163918747	Cont	Fibro
Ncor1	0.002987461	0.163801507	Cont	Fibro
Inhbb	0.001078765	0.163755214	Cont	Fibro
2410002F23Rik	0.55581641	0.16373377	Cont	Bone
Tmem250-ps	0.001858092	0.163553066	Cont	Fibro
Sh3glb2	0.001300202	0.163487844	Cont	Fibro
Crtc3	0.000650094	0.163410943	Cont	Fibro
Tmem167	0.353654277	0.163315626	Cont	Bone
Napg	0.797399211	0.163191493	Cont	Bone
Jtb	0.122247027	0.163098225	Cont	Bone
Sun2	0.083630193	0.163062858	Cont	Bone
Supt20	0.007696065	0.162888842	Cont	Fibro
Tgfb1	0.007551552	0.162617514	Cont	Fibro
Atp9a	0.004499257	0.162570284	Cont	Fibro
Lims1	0.00375249	0.162430735	Cont	Fibro
Tln1	0.014661084	0.162324849	Cont	Fibro
Tek	0.000142263	0.162267393	Cont	Fibro
Phf23	0.003366104	0.162222111	Cont	Fibro
Inhba	0.056368716	0.162222111	Cont	Fibro
Auts2	0.232414862	0.161913816	Cont	Bone
Tuba4a	0.483131921	0.161898228	Cont	Bone
Galt	0.000199344	0.161839991	Cont	Fibro
Extl3	0.001713175	0.161839991	Cont	Fibro
Os9	0.002152243	0.161839991	Cont	Fibro
Hnrnpul1	0.456297179	0.161802642	Cont	Bone
Pappa2	0.000514948	0.161622209	Cont	Fibro
Plaur	0.125256829	0.161403625	Cont	Bone
Tacstd2	0.014434987	0.161321874	Cont	Fibro
Nomo1	0.001750612	0.161228118	Cont	Fibro
Man1a2	0.002475023	0.161228118	Cont	Fibro
Sh3pxd2a	0.001554848	0.161113009	Cont	Fibro
Spcs3	0.461629404	0.161094372	Cont	Bone
Cul9	0.000124526	0.160951905	Cont	Fibro
Cmc1	0.034691368	0.16088823	Cont	Bone
Thoc7	0.035927534	0.1608391	Cont	Bone
Lamb1	0.053008749	0.160827218	Cont	Fibro
Gripap1	0.006412728	0.160766956	Cont	Fibro
Lipa	0.197550566	0.160697093	Cont	Bone
Pmpca	0.001114549	0.160593961	Cont	Fibro
Tubgcp3	9.74E-05	0.160254985	Cont	Fibro
Slc25a36	0.00028725	0.160090209	Cont	Fibro
Nek7	0.000419392	0.160090209	Cont	Fibro
Fam53a	0.200056366	0.159922501	Cont	Bone
Npc2	0.393830828	0.159666353	Cont	Bone
Atp6v1a	0.00044006	0.159656945	Cont	Fibro
Ppp4r2	0.14366971	0.159630604	Cont	Bone
Mcrip1	0.017194884	0.159624436	Cont	Fibro
Foxp1	0.001382114	0.159410109	Cont	Fibro
Bicc1	0.005558627	0.159410109	Cont	Fibro
Il6st	0.001031196	0.159328772	Cont	Fibro
Cdk2ap1	0.599191369	0.159319148	Cont	Bone
Dpysl2	0.007259986	0.159190412	Cont	Fibro
Rnpep	0.033746691	0.159156765	Cont	Bone
Mcl1	0.07927879	0.159079964	Cont	Bone
Cx3cl1	0.071725549	0.159025205	Cont	Bone
Large1	0.06753125	0.159021096	Cont	Bone
Atp6v1a	0.755035197	0.159020312	Cont	Bone
Eri3	0.118480086	0.158842934	Cont	Bone
Sulf1	0.391469146	0.158614857	Cont	Bone
Ssbp3	0.000761698	0.158610477	Cont	Fibro
Map1b	0.000451405	0.158544911	Cont	Fibro
Dgcr8	0.001184251	0.158544911	Cont	Fibro
Ednra	0.001185864	0.158441414	Cont	Fibro
Zmat3	0.430783327	0.158338408	Cont	Bone
Axl	0.495682333	0.158321437	Cont	Bone
Ecrg4	0.004630667	0.158279055	Cont	Fibro
Mest	0.00387825	0.158253673	Cont	Fibro
Srsf6	0.054164453	0.158087856	Cont	Fibro
Ppp1r9b	0.001491082	0.157940334	Cont	Fibro
Lama5	0.008123138	0.157940334	Cont	Fibro
Cacul1	0.510799259	0.15784718	Cont	Bone
Plxnd1	0.913523098	0.157846779	Cont	Bone
S1pr2	0.600299687	0.157843858	Cont	Bone
Atp5g1	0.006783337	0.157747236	Cont	Fibro
Vps33a	0.000987233	0.157727587	Cont	Fibro
Rsrc2	0.000831469	0.157581558	Cont	Fibro
Szrd1	0.043687758	0.157518512	Cont	Bone
2310079G19Rik	0.014865799	0.157515244	Cont	Fibro
Mef2c	0.241529592	0.157291124	Cont	Bone
Myo1e	0.702245238	0.157271671	Cont	Bone
Nudt16l1	0.001002602	0.156885109	Cont	Fibro
Tnrc6a	0.00343422	0.156885109	Cont	Fibro
Fndc3b	0.007013874	0.156755764	Cont	Fibro
Ptpn1	0.094465302	0.156587336	Cont	Bone
Aftph	0.315713051	0.156416014	Cont	Bone
Serf1	0.439352126	0.156373226	Cont	Bone
Cldn12	2.95E-05	0.156244528	Cont	Fibro
Cercam	0.113129891	0.15622071	Cont	Bone
Daam2	0.001105892	0.156215442	Cont	Fibro
Gja4	0.001112086	0.156215442	Cont	Fibro
Rc3h2	0.00865918	0.156139241	Cont	Fibro
Slc25a5	0.154521648	0.156122629	Cont	Bone
Marcksl1	0.008475882	0.156116961	Cont	Fibro
Cd302	0.030805751	0.156023354	Cont	Fibro
Cept1	0.436686136	0.155999533	Cont	Bone
Picalm	0.007913997	0.155992536	Cont	Fibro
Tmed10	0.818706472	0.155899598	Cont	Bone
Tmem128	0.130650167	0.15583702	Cont	Bone
Kdm1a	0.037344769	0.15571478	Cont	Bone
Cables2	0.000758738	0.155413722	Cont	Fibro
Tmem204	0.000794018	0.155413722	Cont	Fibro
Arfgap1	0.009616708	0.155413722	Cont	Fibro
Fis1	0.030917353	0.155413722	Cont	Fibro
Bad	0.253568694	0.15499021	Cont	Bone
Enah	0.40915187	0.154962399	Cont	Bone
Dkk3	0.036675197	0.154940939	Cont	Fibro
Pitpnb	0.860875189	0.1548744	Cont	Bone
Rpl32	0.148662645	0.154864499	Cont	Bone
Rhot1	0.054852407	0.154825461	Cont	Bone
Mtmr10	0.397044589	0.154784925	Cont	Bone
Sort1	0.077337066	0.154756033	Cont	Bone
Ppil2	0.001874282	0.154728844	Cont	Fibro
Tenm2	0.184446859	0.15469583	Cont	Bone
Gpc4	0.004384787	0.154685272	Cont	Fibro
Acap2	0.3962658	0.154638418	Cont	Bone
C1qc	0.314496523	0.154634084	Cont	Bone
Sncg	0.015787143	0.154608422	Cont	Fibro
Lox	0.02728985	0.154476602	Cont	Fibro
Ecm2	0.161320139	0.154471255	Cont	Bone
Psmb4	0.175753101	0.154462254	Cont	Bone
D230025D16Rik	0.028867283	0.154305353	Cont	Bone
Sppl3	0.064455212	0.15428502	Cont	Bone
Frmd6	0.008623026	0.154204421	Cont	Fibro
Eif3a	0.006866315	0.15410039	Cont	Fibro
Fzd1	0.036460563	0.154094027	Cont	Bone
Eif1b	0.001121946	0.15393023	Cont	Fibro
Rin1	0.001804367	0.15393023	Cont	Fibro
Osmr	0.00301303	0.15393023	Cont	Fibro
Peg13	0.000154016	0.153827471	Cont	Fibro
Rubcn	0.000747355	0.153827471	Cont	Fibro
Speg	2.73E-05	0.153770561	Cont	Fibro
Lama2	0.05034782	0.153724489	Cont	Bone
Krtap4-16	0.008437243	0.153572375	Cont	Fibro
Emid1	0.262082285	0.153565452	Cont	Bone
Parl	0.162267497	0.153375871	Cont	Bone
Ube2v1	0.185139979	0.153333921	Cont	Bone
Taok2	0.014323548	0.153219508	Cont	Fibro
Tm9sf3	0.027913236	0.153219508	Cont	Fibro
Prps2	0.062955577	0.153065231	Cont	Bone
Parva	0.003019495	0.153049616	Cont	Fibro
Fndc3b	0.146437318	0.153001706	Cont	Bone
Gm28875	0.706346409	0.152704157	Cont	Bone
Ube2n	0.237133933	0.152654073	Cont	Bone
Acvrl1	0.001091859	0.152616445	Cont	Fibro
Atp5g3	0.718711278	0.152583072	Cont	Bone
Tpm2	0.006445647	0.152528331	Cont	Fibro
Lrpap1	0.17974386	0.152473867	Cont	Bone
Slc44a1	0.234384729	0.152462623	Cont	Bone
Ankrd50	0.002792779	0.152334329	Cont	Fibro
Cdh11	0.643248147	0.152288221	Cont	Bone
Trip12	0.564438966	0.15225807	Cont	Bone
Trmt2a	0.515894592	0.152234059	Cont	Bone
Arhgef18	0.000718392	0.152227204	Cont	Fibro
2300009A05Rik	0.002050945	0.152227204	Cont	Fibro
Chmp2a	0.408888806	0.152192571	Cont	Bone
Dnajc10	0.659122636	0.152136457	Cont	Bone
Tulp4	0.003539221	0.152064068	Cont	Fibro
Rc3h2	0.024687904	0.15204811	Cont	Bone
Ccni	0.002609496	0.152031082	Cont	Fibro
Smoc2	0.083965284	0.151933153	Cont	Fibro
Inpp5a	0.008535087	0.151855902	Cont	Fibro
Cpd	0.001824505	0.151741806	Cont	Fibro
Tmem165	0.026915288	0.151741806	Cont	Fibro
Rab11fip5	0.007017463	0.151661587	Cont	Fibro
Adck5	0.226527458	0.151640901	Cont	Bone
Brip1os	0.01265446	0.151620148	Cont	Fibro
Kif26a	0.004009481	0.151556246	Cont	Fibro
Vamp3	0.008190254	0.151556246	Cont	Fibro
Arpc2	0.200225763	0.151537491	Cont	Bone
Elp5	0.604965929	0.151528658	Cont	Bone
Map1lc3a	0.031410811	0.151509267	Cont	Fibro
Sema3g	0.009928219	0.151350934	Cont	Fibro
Sox4	0.001922022	0.151068251	Cont	Fibro
Mrpl41	0.876231682	0.150994892	Cont	Bone
Chl1	0.003093047	0.150926331	Cont	Fibro
Tgfb3	0.336336331	0.150918555	Cont	Bone
Ndufa4l2	0.00468403	0.150866932	Cont	Fibro
Fes	0.256194737	0.150639939	Cont	Bone
Ptx3	0.016008775	0.150498231	Cont	Fibro
Ywhae	0.043452964	0.150461183	Cont	Bone
Ndufc1	0.234884316	0.150362444	Cont	Bone
Mtmr4	0.453433341	0.15020465	Cont	Bone
Duoxa1	0.331226792	0.150190141	OAA	Bone
Ogt	0.002491601	0.150102367	Cont	Fibro
Zer1	0.010090835	0.150080277	Cont	Fibro
Ube2e1	0.393081473	-0.150023823	OAA	Bone
Ptprs	0.084158798	-0.150096332	OAA	Fibro
Sec13	0.03767401	-0.150234203	OAA	Fibro
Acer1	0.040857702	-0.150307083	OAA	Fibro
Ahnak	0.071340706	-0.150307083	OAA	Fibro
Rpl13	0.309388984	-0.150701607	OAA	Bone
Exosc5	0.804516346	-0.150830938	OAA	Bone
Tomm22	0.878523262	-0.150964338	OAA	Bone
Eif4a1	0.604856039	-0.151111431	OAA	Bone
Col13a1	0.014045852	-0.151191704	OAA	Fibro
Ptbp1	0.665707783	-0.151447769	OAA	Bone
Uqcrc1	0.043808968	-0.151625439	OAA	Bone
Nudt21	0.662379061	-0.151709166	OAA	Bone
Tns2	0.537486682	-0.15192702	OAA	Bone
Lmf2	0.946507363	-0.151939161	OAA	Bone
Cltb	0.433643809	-0.152083626	OAA	Bone
Anxa8	0.494463586	-0.152204505	OAA	Fibro
Sema3f	0.785341225	-0.152209297	OAA	Bone
Cox5a	0.106191833	-0.152225986	OAA	Fibro
Ccdc3	0.32002816	-0.152516387	OAA	Bone
Cenpb	0.97268708	-0.153045754	OAA	Bone
Nme2	0.451395435	-0.153150651	OAA	Bone
Actn4	0.204830239	-0.1532196	OAA	Bone
Vdac1	0.248656152	-0.153658653	OAA	Fibro
Rps15	0.002806504	-0.153783527	OAA	Fibro
Stub1	0.854918122	-0.1539043	OAA	Bone
Ywhae	0.04379327	-0.15410068	OAA	Fibro
Ddx21	0.822985547	-0.154240555	OAA	Bone
Rpl3	0.693272919	-0.154396503	OAA	Bone
Rpl36	0.011480077	-0.154414625	OAA	Fibro
Fmnl3	0.481509187	-0.154536862	OAA	Bone
Hmgb2	0.760951949	-0.154559856	OAA	Bone
Pten	0.921516832	-0.154932372	OAA	Bone
Tm9sf4	0.654268676	-0.155076147	OAA	Bone
Mrpl51	0.953878067	-0.15512075	OAA	Bone
Tubb2a	0.057996524	-0.155205883	OAA	Fibro
Spint2	0.255878708	-0.155205883	OAA	Fibro
Rplp0	0.01268711	-0.155638331	OAA	Fibro
Eif4ebp1	0.176505511	-0.155662816	OAA	Bone
Cmtm4	0.018449043	-0.155682925	OAA	Fibro
Ppa1	0.887178139	-0.155716299	OAA	Bone
Slco2a1	0.779339652	-0.155826548	OAA	Bone
Ttll12	0.373063615	-0.155885845	OAA	Bone
Nudt3	0.763505838	-0.155947706	OAA	Bone
Acan	0.002845518	-0.156029888	OAA	Fibro
Cox6b1	0.032086749	-0.156440327	OAA	Fibro
Fads2	0.362250618	-0.157026308	OAA	Bone
Nrp2	0.540547404	-0.157057181	OAA	Bone
Rpl4	0.216742265	-0.157224139	OAA	Bone
Exoc5	0.558641724	-0.157272816	OAA	Bone
Sppl2b	0.428183904	-0.157354616	OAA	Bone
Ssbp3	0.463762705	-0.157386636	OAA	Bone
Ewsr1	0.678092861	-0.157474777	OAA	Bone
H2-Eb1	0.813460154	-0.157484546	OAA	Bone
Flnb	0.484841653	-0.157662234	OAA	Bone
Nfatc1	0.907225425	-0.157720613	OAA	Bone
Ctbp1	0.888190013	-0.157838708	OAA	Bone
Psmd12	0.67333235	-0.157902537	OAA	Bone
Pcyox1	0.392536317	-0.158012491	OAA	Bone
Srgn	0.029057895	-0.158126588	OAA	Fibro
Tmpo	0.914372864	-0.158185118	OAA	Bone
Morf4l2	0.034596783	-0.15834747	OAA	Fibro
Glyr1	0.211819275	-0.158684587	OAA	Bone
Eif3f	0.479421373	-0.158709832	OAA	Bone
Rtf2	0.746676277	-0.15875114	OAA	Bone
Kmt5a	0.29534696	-0.158820195	OAA	Bone
Chchd3	0.878917229	-0.158903703	OAA	Bone
Ncl	0.069725644	-0.159068892	OAA	Fibro
Mrpl37	0.113682818	-0.159080118	OAA	Bone
Tardbp	0.781753731	-0.159152393	OAA	Bone
Kctd17	0.122325099	-0.159159334	OAA	Bone
mt-Nd4	0.089184158	-0.159418809	OAA	Bone
Med28	0.33786492	-0.159620479	OAA	Bone
Kifap3	0.549276306	-0.159620805	OAA	Bone
Fopnl	0.814037554	-0.159664411	OAA	Bone
Mrps18c	0.369687035	-0.159807704	OAA	Bone
Tm2d2	0.85818139	-0.159824959	OAA	Bone
Gls	0.875557847	-0.159952266	OAA	Bone
Got2	0.903032297	-0.159994716	OAA	Bone
Hoxa9	0.677485138	-0.160005441	OAA	Bone
Net1	0.204320792	-0.160088104	OAA	Fibro
Mia3	0.991917051	-0.160165323	OAA	Bone
Son	0.844403195	-0.160271605	OAA	Bone
H3f3b	0.072006402	-0.160392181	OAA	Fibro
S100a13	0.765690225	-0.160486842	OAA	Bone
Ly6g6c	0.578229849	-0.160563834	OAA	Bone
Gabarapl2	0.019351346	-0.16097619	OAA	Fibro
Rab4b	0.484907129	-0.161034302	OAA	Bone
Creb3	0.747833217	-0.161158384	OAA	Bone
Ptn	0.209685705	-0.161648618	OAA	Fibro
Dsp	0.553038664	-0.161657104	OAA	Fibro
Eno1	0.131766714	-0.161683124	OAA	Fibro
Creb3l2	0.25946202	-0.16183474	OAA	Bone
Rarg	0.258192598	-0.161868538	OAA	Bone
Ralb	0.541601568	-0.1622908	OAA	Bone
Mafb	0.074366196	-0.162501311	OAA	Fibro
Zswim8	0.387608442	-0.162538871	OAA	Bone
Gsto1	0.791638432	-0.162549403	OAA	Bone
Pfkl	0.970726243	-0.162844307	OAA	Bone
2610001J05Rik	0.409297289	-0.162874054	OAA	Bone
Srprb	0.005603177	-0.162947758	OAA	Fibro
Mllt1	0.532516944	-0.163111275	OAA	Bone
Ndufa5	0.983424571	-0.163291281	OAA	Bone
Slc25a28	0.924029608	-0.163359603	OAA	Bone
Arrdc3	0.130474006	-0.163434715	OAA	Bone
Gsto1	0.076682567	-0.163533054	OAA	Fibro
Anxa11	0.705134745	-0.163683235	OAA	Bone
Sp7	0.0889719	-0.163745128	OAA	Fibro
Rabgef1	0.93168761	-0.163865217	OAA	Bone
Dvl1	0.432220607	-0.163886702	OAA	Bone
Kifc3	0.537486682	-0.164387423	OAA	Bone
Prrx2	0.940241137	-0.164455213	OAA	Bone
Uba52	0.141061404	-0.164506031	OAA	Bone
2310011J03Rik	0.947134027	-0.164998154	OAA	Bone
Eif5	0.962894372	-0.165112805	OAA	Bone
Txndc5	0.469849124	-0.165118341	OAA	Bone
Endou	0.240992805	-0.165331778	OAA	Bone
Cds1	0.383660118	-0.165364362	OAA	Bone
Timp1	0.023659717	-0.165418517	OAA	Fibro
Med1	0.543654255	-0.165504317	OAA	Bone
Snhg20	0.653816713	-0.165855242	OAA	Bone
Cd44	0.026779232	-0.165988706	OAA	Fibro
Cct5	0.488701492	-0.166027785	OAA	Bone
Kazald1	0.002783191	-0.166154105	OAA	Fibro
Mrpl14	0.789903431	-0.166251318	OAA	Bone
Lce1c	0.007009375	-0.166269621	OAA	Fibro
Mtss1	0.378774332	-0.166342237	OAA	Bone
Rnh1	0.10508814	-0.166644165	OAA	Fibro
Scamp3	0.611317169	-0.166676317	OAA	Bone
Pdgfra	0.434764348	-0.166777386	OAA	Bone
Clic1	0.127437461	-0.166842594	OAA	Fibro
Gabarap	0.397591935	-0.167186842	OAA	Bone
Abhd12	0.661503798	-0.167271535	OAA	Bone
Krtap4-8	0.272280726	-0.167505576	OAA	Fibro
Atp6v0a1	0.349787829	-0.167807697	OAA	Bone
Dnajc15	0.556750487	-0.167839793	OAA	Bone
Clec14a	0.600757089	-0.167905186	OAA	Bone
Ubald1	0.103880427	-0.167938217	OAA	Bone
Mob2	0.73638662	-0.167959028	OAA	Bone
Cyp51	0.062244132	-0.168266889	OAA	Bone
Zfp771	0.373623368	-0.168364736	OAA	Bone
Jag2	0.696782665	-0.168406575	OAA	Bone
Tex264	0.493334382	-0.168642054	OAA	Bone
Nol12	0.194459509	-0.168645118	OAA	Bone
Ptma	0.076352895	-0.168762438	OAA	Fibro
Psmd8	0.151995828	-0.168858314	OAA	Fibro
Serpinb5	0.740905516	-0.168861058	OAA	Bone
G6pc3	0.148919747	-0.169070471	OAA	Bone
Hopx	0.529216755	-0.169357993	OAA	Bone
Kpna4	0.632913866	-0.169440806	OAA	Bone
Atp8b2	0.909770562	-0.169597343	OAA	Bone
Islr	0.772422205	-0.169597753	OAA	Bone
Cdh1	0.85943909	-0.16974304	OAA	Bone
Atp5o	0.502055894	-0.170396291	OAA	Bone
Ybx3	0.014628554	-0.170430048	OAA	Fibro
Dnajc5	0.623714318	-0.170667733	OAA	Bone
Perp	0.364636257	-0.170784311	OAA	Fibro
Rbx1	0.389664658	-0.170785127	OAA	Bone
Bin1	0.786171772	-0.17088911	OAA	Bone
Twsg1	0.584022608	-0.171101145	OAA	Bone
Sec61g	0.994203997	-0.171138247	OAA	Bone
Mtx1	0.529330311	-0.171213621	OAA	Bone
Ier2	0.063692165	-0.171261848	OAA	Fibro
Uqcr11	0.019314744	-0.171588107	OAA	Fibro
Ftl1	0.021868552	-0.171724008	OAA	Fibro
Ndufs4	0.83699944	-0.171755623	OAA	Bone
Srrm2	0.9239821	-0.171803783	OAA	Bone
Atl3	0.444210116	-0.171930394	OAA	Bone
H3f3a	0.075588132	-0.171948259	OAA	Fibro
Sdc1	0.278468268	-0.171986464	OAA	Bone
Degs1	0.206848114	-0.172187483	OAA	Bone
Fis1	0.646745002	-0.172226421	OAA	Bone
Chst12	0.369262289	-0.172241586	OAA	Bone
Laptm5	0.916206247	-0.172341737	OAA	Bone
Tmod3	0.498617344	-0.172379782	OAA	Bone
Alox12b	0.078060675	-0.172439207	OAA	Fibro
Tdg	0.454427547	-0.172766375	OAA	Bone
Apoc1	0.006273328	-0.172773364	OAA	Fibro
Ly6a	0.281561045	-0.172880775	OAA	Fibro
Antxr2	0.529330438	-0.173011778	OAA	Bone
Rpl23a	0.337988532	-0.173174375	OAA	Bone
Rpl18	0.179083125	-0.173305017	OAA	Bone
Atp6v0e	0.092858084	-0.173359176	OAA	Fibro
Ilrun	0.460652254	-0.173386174	OAA	Bone
2410006H16Rik	0.291144705	-0.173705114	OAA	Bone
Rac1	0.813861968	-0.173818084	OAA	Bone
Chmp4b	0.680187801	-0.173867014	OAA	Bone
Hint1	0.045948553	-0.173893904	OAA	Fibro
Fgfr2	0.055191526	-0.173893904	OAA	Fibro
Cyhr1	0.806882995	-0.173948658	OAA	Bone
Czib	0.991746729	-0.17395814	OAA	Bone
Hnrnpk	0.222753343	-0.174207757	OAA	Bone
Pth1r	0.468204579	-0.17435994	OAA	Bone
Clta	0.927565728	-0.174478449	OAA	Bone
Gm11808	0.119942249	-0.174692517	OAA	Fibro
Pcsk6	0.008604144	-0.175354861	OAA	Fibro
Rora	0.679981616	-0.175366138	OAA	Bone
Prdx1	0.129579902	-0.176014345	OAA	Fibro
Atxn10	0.664281081	-0.176030269	OAA	Bone
Eif3k	0.02400955	-0.176100422	OAA	Fibro
Lce1g	0.002808665	-0.176126314	OAA	Fibro
Hnrnpk	0.048693626	-0.176232146	OAA	Fibro
Btbd7	0.401267455	-0.176313122	OAA	Bone
Atf4	0.143499089	-0.176444679	OAA	Fibro
Cnbp	0.038931726	-0.17663928	OAA	Fibro
Tent5b	0.70874832	-0.176652969	OAA	Bone
Tubb4b	0.150675964	-0.176670988	OAA	Fibro
Acer1	0.529216755	-0.176702084	OAA	Bone
St3gal4	0.936600569	-0.176713223	OAA	Bone
H2-K1	0.899455371	-0.176896392	OAA	Fibro
Ntrk2	0.005111677	-0.176927166	OAA	Fibro
Snhg9	0.3256509	-0.177087994	OAA	Bone
Reep5	0.036457378	-0.177161617	OAA	Fibro
Ezr	0.086626462	-0.177339147	OAA	Fibro
Oga	0.588523747	-0.177553585	OAA	Bone
Ppp2r5a	0.347416622	-0.178078478	OAA	Bone
Papss1	0.346543505	-0.178179292	OAA	Bone
Prss23	0.955243776	-0.178344955	OAA	Bone
Gm16286	0.577152005	-0.17850716	OAA	Bone
Rpsa	0.027417136	-0.178730882	OAA	Bone
Cysrt1	0.00775344	-0.178769525	OAA	Fibro
Atp5a1	0.01554423	-0.178904354	OAA	Fibro
Pycard	0.046254026	-0.179029668	OAA	Fibro
Mrpl52	0.066121401	-0.179043048	OAA	Fibro
Zfp652	0.628080584	-0.179229932	OAA	Bone
Megf9	0.707000263	-0.17928703	OAA	Bone
Plin3	0.13559786	-0.179517738	OAA	Bone
Rnase4	0.709079699	-0.179740629	OAA	Bone
Mon2	0.917645794	-0.179962098	OAA	Bone
Fosb	0.003164846	-0.179987662	OAA	Fibro
Mrfap1	0.771334199	-0.180069013	OAA	Bone
Ly6e	0.697297024	-0.180070395	OAA	Bone
Car2	0.882359723	-0.180249988	OAA	Bone
Jpt1	0.128322994	-0.180507645	OAA	Fibro
H3f3b	0.349064198	-0.180637462	OAA	Bone
Sec24b	0.734857406	-0.180799096	OAA	Bone
Pla2g4f	0.104144678	-0.180882615	OAA	Bone
Atf4	0.968248522	-0.181014618	OAA	Bone
Smc1a	0.862435669	-0.181114854	OAA	Bone
Fam207a	0.277834603	-0.181132385	OAA	Bone
Akap8l	0.069871195	-0.181453635	OAA	Bone
Mybbp1a	0.846459908	-0.181504632	OAA	Bone
Impdh1	0.895299927	-0.181596414	OAA	Bone
Rpl18a	0.003779642	-0.181991505	OAA	Fibro
Sh3d19	0.574476363	-0.182031542	OAA	Bone
Pold4	0.718098538	-0.182263984	OAA	Bone
Npdc1	0.756807358	-0.182339828	OAA	Bone
Gba	0.368439793	-0.182622445	OAA	Bone
Kdm2a	0.694213284	-0.182662928	OAA	Bone
Myo10	0.525710375	-0.182843372	OAA	Bone
Aars	0.961216468	-0.182854403	OAA	Bone
Rps19	0.003053799	-0.18306488	OAA	Fibro
Mgll	0.675827519	-0.183131261	OAA	Bone
Vcan	0.449950598	-0.183181441	OAA	Bone
Csrp1	0.870758405	-0.183429863	OAA	Bone
Psmd4	0.606790767	-0.183454868	OAA	Bone
Ifitm2	0.129821574	-0.183543901	OAA	Bone
Hnrnpc	0.312594617	-0.184056222	OAA	Bone
Krt35	0.218785437	-0.184111333	OAA	Fibro
Ube2c	0.003149094	-0.184254415	OAA	Fibro
Rab22a	0.846724373	-0.18464613	OAA	Bone
Mogs	0.854652867	-0.18479979	OAA	Bone
Islr	0.097890822	-0.184856009	OAA	Fibro
Ppt2	0.32750121	-0.184857097	OAA	Bone
Sod3	0.740438921	-0.184894753	OAA	Bone
Sec16a	0.226241526	-0.184916194	OAA	Bone
Rpl17	0.330605195	-0.18522124	OAA	Bone
Phf5a	0.352676133	-0.185262501	OAA	Bone
Rps23	0.562074149	-0.185423698	OAA	Bone
Sbno1	0.444913199	-0.185447854	OAA	Bone
Cwc22	0.000231959	-0.185484881	OAA	Fibro
Mpnd	0.109849324	-0.185486022	OAA	Bone
Ube2j1	0.335920746	-0.185626546	OAA	Bone
Fubp3	0.369444533	-0.186190679	OAA	Bone
5031439G07Rik	0.835573014	-0.186473877	OAA	Bone
Shisa2	0.05192091	-0.186525939	OAA	Bone
Grcc10	0.088175058	-0.186699834	OAA	Fibro
Cldnd1	0.883843598	-0.186849167	OAA	Bone
Tagln	0.496266549	-0.187071763	OAA	Bone
H2afx	0.589480904	-0.187161442	OAA	Bone
Saraf	0.152988498	-0.187167342	OAA	Bone
Gm8797	0.009374088	-0.18717462	OAA	Fibro
Bcl9l	0.450380845	-0.187197102	OAA	Bone
Satb2	0.004831444	-0.187272933	OAA	Fibro
Rhbdf1	0.259085994	-0.18727698	OAA	Bone
Akr1b8	0.918260917	-0.187282345	OAA	Bone
Ganab	0.393394611	-0.187481166	OAA	Bone
Cdca8	0.12732865	-0.187687364	OAA	Bone
Pygo2	0.65551625	-0.1877842	OAA	Bone
Arl2bp	0.63331469	-0.187852721	OAA	Bone
Clip1	0.615418474	-0.188102691	OAA	Bone
Sulf2	0.423591479	-0.188130349	OAA	Bone
Slit3	0.362491494	-0.18815351	OAA	Bone
Fau	0.000492749	-0.188156667	OAA	Fibro
Hras	0.010953057	-0.188284996	OAA	Fibro
Fkbp1a	0.780575277	-0.188285131	OAA	Bone
Safb2	0.514430793	-0.188624123	OAA	Bone
Stx7	0.951426607	-0.188739788	OAA	Bone
mt-Co3	0.002360417	-0.188751862	OAA	Fibro
Ei24	0.46497078	-0.18897177	OAA	Bone
Itgav	0.78679403	-0.189128998	OAA	Bone
Rpl14	0.006277931	-0.189133275	OAA	Fibro
Higd1a	0.017344359	-0.189423602	OAA	Fibro
mt-Co3	0.003522376	-0.189611179	OAA	Bone
Rps12	0.00480745	-0.189623614	OAA	Fibro
Vldlr	0.895152747	-0.189706526	OAA	Bone
Cbfb	0.528120999	-0.18975443	OAA	Bone
U2af1	0.437814792	-0.190106096	OAA	Bone
Rnf20	0.256850454	-0.190239511	OAA	Bone
Atg4b	0.449146285	-0.19048668	OAA	Bone
Impdh2	0.420162981	-0.190647053	OAA	Bone
H2afj	0.030790024	-0.190967417	OAA	Fibro
Pdia6	0.815383478	-0.191088319	OAA	Bone
Atp5l	0.29074067	-0.191137555	OAA	Bone
Rps24	0.003079496	-0.19114119	OAA	Fibro
Ewsr1	0.059140043	-0.19114119	OAA	Fibro
Mbd6	0.602376344	-0.19116946	OAA	Bone
mt-Cytb	0.013019809	-0.191177134	OAA	Bone
Mfsd5	0.579926682	-0.191218464	OAA	Bone
Rpl6	0.001269929	-0.191253678	OAA	Fibro
Pafah1b2	0.283772655	-0.191331411	OAA	Bone
Cotl1	0.888575676	-0.19148631	OAA	Bone
Hp1bp3	0.990234586	-0.191504719	OAA	Bone
Tmem30a	0.802941144	-0.191809882	OAA	Bone
St6galnac4	0.396891222	-0.191993652	OAA	Bone
Polr2j	0.714014491	-0.19225024	OAA	Bone
Nabp2	0.562463818	-0.192303646	OAA	Bone
Ehd4	0.868623872	-0.192426995	OAA	Bone
Imp3	0.70116354	-0.192647667	OAA	Bone
Rpl7	0.005914292	-0.192827181	OAA	Fibro
Rpl11	0.139509285	-0.19285894	OAA	Bone
Nfkbia	0.024087286	-0.192908282	OAA	Fibro
Naca	0.008711385	-0.193458911	OAA	Fibro
Serpinf1	0.83112309	-0.19377123	OAA	Fibro
Ergic3	0.421596702	-0.193795501	OAA	Bone
Gtf2f1	0.704247107	-0.194112976	OAA	Bone
Atad1	0.430841904	-0.194130162	OAA	Bone
Myl6	0.048673114	-0.194168535	OAA	Bone
Plekha5	0.981195182	-0.194169992	OAA	Bone
Emp3	0.169076277	-0.19440377	OAA	Fibro
Snrpg	0.841004813	-0.194482604	OAA	Bone
Pum1	0.730781907	-0.194507869	OAA	Bone
Serbp1	0.179956456	-0.195098178	OAA	Bone
Dusp1	0.011402517	-0.19520441	OAA	Fibro
Gapdh	0.08838516	-0.195221265	OAA	Fibro
Pmm2	0.272252396	-0.1957416	OAA	Bone
S100a9	0.035560752	-0.19589818	OAA	Fibro
Clcf1	0.018508861	-0.196107327	OAA	Fibro
Adam12	0.00073565	-0.196489433	OAA	Fibro
Rps11	0.007258459	-0.196489433	OAA	Fibro
2310046K23Rik	0.80381227	-0.196634921	OAA	Bone
Rps15a	0.001315415	-0.196696248	OAA	Fibro
Filip1l	0.633228832	-0.196716151	OAA	Bone
Psma6	0.0290237	-0.197177423	OAA	Fibro
Nupr1	0.909150538	-0.197694688	OAA	Bone
Rps6	0.010930683	-0.19777448	OAA	Fibro
Rpl13	0.001233224	-0.197945248	OAA	Fibro
Rps8	0.000143438	-0.197992095	OAA	Fibro
Hnrnpa3	0.039168038	-0.198223233	OAA	Fibro
[truncated: 1,357 more rows]
